# Supplementary material for: Genetic influences on creativity: an exploration of convergent and divergent thinking
Source: PeerJ. 2018 Jul 30;6:e5403. doi: 10.7717/peerj.5403 (PMC6071619; doi:10.7717/peerj.5403)
Supplement: Supplemental Information 1 [file peerj-06-5403-s001.xls]

## Sheet: gene
Sample Name	rs10251794	rs1042778	rs1079597	rs12601685	rs16921695	rs17070145	rs1799913	rs1800497	rs2576037	rs35855737	rs362584	rs42352	rs4680	rs5993883	rs6265	rs644148	rs6832769	rs912765	DRD4
1632001	TA	GG	CT	CC	GT	TT	GG	GG	CC	TT	GA	TA	GA	GG	CT	GG	AA	CT	24
1632002	TA	GG	CC	CC	TT	TT	GT	GG	CT	TT	GA	AA	GG	GT	CC	GG	GA	CT	44
1632003	TA	GG	CC	CC	TT	TT	GG	GG	CT	TT	GA	TT	GA	GT	CT	GG	AA	CT	24
1632004	TT	GG	CC	CC	GT	TT	GG	GG	CT	TT	GA	AA	AA	TT	CT	GG	AA	CT	46
1632005	TT	GG	CT	CC	GT	TT	GG	GA	CC	TT	GG	TA	GA	GG	TT	GG	GA	TT	44
1632006	TA	GG	CT	CG	TT	CT	GT	GA	CT	TT	GG	TA	GA	GT	CT	GG	AA	CT	44
1632007	TA	GG	CT	CC	TT	CT	GG	GA	CT	TT	GA	AA	GA	GT	CC	GG	AA	CT	24
1632008	TT	GG	CC	CG	GT	TT	GT	GG	CC	TT	GG	TA	AA	TT	CT	GT	GA	CC	44
1632009	TA	TG	CT	CC	TT	TT	GG	GA	CT	TT	GA	AA	GG	GG	TT	GG	AA	CC	44
1632010	TT	GG	TT	CC	TT	CT	TT	GA	CT	TT	AA	TT	GG	TT	CT	GG	GA	CC	44
1632011	TT	GG	CT	CG	TT	TT	GG	GA	TT	TT	GA	TA	GG	GT	TT	GG	AA	CT	44
1632012	TA	TG	CT	CC	TT	CT	GG	GA	TT	TT	GG	AA	GG	GG	CT	GG	AA	CT	44
1632013	TT	GG	CT	CC	GT	TT	TT	GA	CT	TT	GG	TT	GG	GG	CT	GT	GG	CC	44
1632014	TT	GG	CT	CG	GT	CT	TT	GA	CC	TT	GA	AA	GG	GG	TT	GG	AA	CT	44
1632015	TT	GG	CT	CC	TT	TT	GG	GA	CT	TT	GG	AA	GG	TG	CC	GG	AA	TT	44
1632016	TA	GG	CC	CC	TT	TT	GT	GG	CT	TT	GG	TA	GG	TT	CT	GT	GA	CT	24
1632017	TA	GG	CT	CC	TT	TT	GG	GA	CC	TT	GG	TA	GA	GT	CT	GT	GA	CC	44
1632018	TA	GG	CT	CC	TT	TT	TT	GG	CC	TT	GG	AA	GG	TT	CC	GG	GA	CC	44
1632019	TA	GG	CT	CC	TT	TT	GG	GA	CT	TT	GG	TA	GG	TT	CC	GG	GA	CC	24
1632020	TA	GG	CT	CC	TT	TT	GT	GA	CC	TT	GG	TA	AA	TT	CT	GG	AA	CC	22
1632021	TA	GG	CC	CC	TT	TT	TT	GG	TT	TT	GA	TA	GA	GG	CT	GG	AA	CC	44
1632022	TT	GG	TT	CC	TT	CT	GG	AA	TT	TT	GG	TA	GG	TT	CC	GG	AA	CC	44
1632023	TA	TG	CT	CC	TT	TT	GG	GA	CC	TT	GA	TT	GG	GG	TT	GG	GA	CC	44
1632024	TA	GG	CT	CG	TT	TT	TT	GA	CT	TT	GA	TA	GG	GG	CT	GG	GG	CC	24
1632025	TT	GG	CC	CC	GT	TT	GG	GG	CT	TT	GG	AA	GG	TT	CC	GT	AA	CT	34
1632026	TT	GG	CT	CC	TT	CC	GT	GA	CT	TT	GA	TT	GG	GT	CC	GT	GA	CT	44
1632027	TA	GG	TT	CC	TT	TT	GT	AA	CT	TT	GG	TA	GG	TT	TT	GT	AA	CC	44
1632029	TT	GG	TT	CC	TT	TT	GG	AA	TT	TT	GG	AA	AA	GT	CT	GG	AA	TT	22
1632030	TT	GG	CT	CC	GT	TT	GG	GA	TT	TT	GA	AA	GG	GT	CC	GT	GA	CT	45
1632031	TT	GG	CC	CC	GT	TT	GT	GG	CT	TT	GG	AA	GG	GG	CT	GG	GA	CC	46
1632032	TT	GG	CC	CG	TT	TT	GT	GG	CT	TT	GG	AA	GG	GT	CT	GG	AA	CC	24
1632033	TT	GG	CT	CC	TT	CT	GT	GA	CT	TT	GG	TA	GG	TT	CT	GG	AA	CT	44
1632034	TT	GG	CT	CC	TT	TT	GT	GA	CC	TT	GA	TA	GA	GT	CC	GT	GG	TT	44
1632035	TT	TG	CC	CC	TT	CT	GG	GG	CT	TT	GG	TA	GG	GT	CT	GG	AA	CT	44
1632036	TA	GG	TT	CG	GT	TT	GT	GA	CT	TT	GA	TT	GA	GT	TT	GG	GA	CC	44
1632037	TT	GG	CC	CC	GT	TT	GT	GG	TT	TT	AA	TT	GG	GT	TT	GG	GA	CC	44
1632038	TT	GG	CT	CC	GT	TT	GT	GA	TT	TT	GG	TT	GA	TT	TT	GG	GA	CC	44
1632039	TA	GG	CT	CC	TT	CT	TT	GA	CT	TT	GG	AA	GG	TT	CC	GG	GA	CC	44
1632040	TA	TG	CC	GG	GT	TT	GT	GG	TT	TT	GG	AA	GG	GT	CT	GG	AA	CC	44
1632041	TT	GG	CT	CC	TT	TT	TT	GG	CT	TT	GA	TA	GG	GT	TT	GG	AA	CT	44
1632042	TT	GG	CT	CC	TT	TT	TT	GA	CT	TT	GG	TA	GG	TT	CC	GT	AA	CT	44
1632043	TT	GG	CT	CC	GT	CT	GT	GA	CT	TT	GA	AA	GA	GT	CT	GG	GA	TT	24
1632044	TT	TG	TT	CC	TT	CC	TT	AA	TT	TT	GA	AA	GA	GG	CT	GG	GA	CC	24
1632045	TA	TG	CC	CC	TT	TT	GT	GG	CC	TT	GA	TA	GG	TT	CT	GG	GA	CT	24
1632046	TT	GG	CT	CC	TT	TT	GT	GA	CT	TT	GG	AA	AA	GT	CT	GG	AA	CC	44
1632047	TT	GG	CC	CC	TT	TT	GT	GG	CC	TT	GA	TT	GG	GT	CC	GT	AA	CC	44
1632048	AA	GG	TT	CG	TT	CT	GT	AA	CT	TT	GA	TA	GG	GG	CT	GT	AA	CT	44
1632050	TT	GG	CC	CC	GT	CC	TT	GG	CT	TT	GG	TA	GG	GT	CC	GG	GA	CC	44
1632051	TT	GG	CC	CC	TT	TT	GG	GG	CT	TT	GG	TA	GG	TT	TT	GT	AA	CC	24
1632052	TT	GG	CT	CC	TT	TT	GT	GA	CC	TT	GG	TA	GG	GT	CT	GG	AA	CT	24
1632053	TA	GG	TT	CC	GT	TT	GT	AA	CC	TT	GG	AA	GG	GT	CC	GG	GG	CC	22
1632054	TT	GG	CC	CC	GG	TT	TT	GG	CT	TT	GG	AA	GA	GG	TT	GT	GG	CT	34
1632055	TA	GG	CC	CC	TT	TT	GG	GG	CT	TT	GA	TA	GA	GT	TT	GT	GA	CT	44
1632056	TA	GG	CT	CC	TT	TT	GT	GA	CT	TT	GG	TA	GA	GG	CC	GT	GG	CT	24
1632057	TA	GG	CT	CC	TT	CT	GG	GA	CT	TT	GG	TT	GG	GT	TT	GG	AA	CT	24
1632058	TA	GG	CT	CG	GT	TT	GT	GA	CT	TT	GG	TT	GG	GT	CT	GT	GA	CC	44
1632059	TA	TG	CT	CC	TT	TT	GT	GA	TT	TT	GG	TA	GG	TT	CT	GT	GA	CC	44
1632060	TA	TG	CT	CC	GT	CT	GT	GA	TT	TT	GG	TT	GG	TT	TT	GG	GG	CT	22
1632061	TA	GG	TT	CG	TT	TT	TT	AA	CT	TT	GA	AA	GG	TG	CT	GT	AA	CT	45
1632062	TT	GG	CC	CC	TT	CT	GT	GG	CT	TT	GG	AA	AA	TT	TT	TT	AA	TT	47
1632063	TA	GG	CC	CC	GT	CT	TT	GG	CT	TT	GA	AA	GG	TG	TT	GG	GG	CT	24
1632064	TA	GG	CC	CC	TT	TT	GG	GG	CT	TT	GG	TT	GG	TG	CC	GT	GA	CC	44
1632065	TT	TG	CT	CG	GT	TT	GT	GA	CC	TT	GG	TA	GG	GT	TT	GG	GG	TT	24
1632066	TT	GG	CT	CC	TT	TT	GT	GG	CC	TT	GA	TA	AA	TT	CC	GG	AA	CC	44
1632067	TA	GG	CT	CC	GT	CT	TT	GA	CT	TT	GA	TT	GG	GG	CT	GG	GA	CC	44
1632068	AA	GG	CC	CC	GT	CT	GT	GG	TT	TT	AA	TA	GA	TT	CT	GG	AA	CC	44
1632069	TT	GG	CC	CC	GT	TT	GG	GG	CT	TT	GG	TT	GA	TG	CC	GT	AA	CT	44
1632070	TT	GG	CT	CC	TT	TT	GG	GA	TT	TT	GG	TT	GG	GT	CT	GG	GA	TT	24
1632071	TT	GG	CT	CC	TT	CT	TT	GA	CC	TT	GG	AA	GG	GG	CT	GG	AA	TT	45
1632072	TT	GG	CT	CC	GT	CT	TT	GA	CT	TT	GG	TT	GG	TT	CT	GG	AA	TT	44
1632073	TA	GG	TT	CC	GT	TT	GG	AA	TT	TT	GA	AA	GG	GT	CC	GG	AA	CC	24
1632074	TT	GG	CT	CC	GT	TT	GG	GA	TT	TT	GA	TA	AA	TT	CC	GG	AA	CC	24
1632075	TA	GG	CT	CG	TT	TT	GT	GA	TT	TT	GA	TA	GG	TT	CT	GG	AA	CC	44
1632076	TT	GG	CC	CC	GT	CT	TT	GG	CT	TT	GA	TA	GG	GT	CT	GT	AA	CT	44
1632077	TA	GG	CC	CC	TT	CT	GT	GG	CC	TT	GA	TT	GA	GT	CT	GG	GA	CC	24
1632078	AA	GG	CC	CC	TT	CT	GT	GG	CT	TT	GG	AA	GG	TT	TT	GT	GA	CT	44
1632079	TT	TG	CT	CG	TT	TT	GT	GA	TT	TT	GG	AA	GA	GT	TT	GG	AA	CC	34
1632080	TA	GG	CC	CC	TT	TT	GG	GG	CT	TT	GG	TA	GG	GT	CT	GT	AA	CT	44
1632081	TT	GG	CC	CC	TT	TT	GT	GG	CT	TT	GG	AA	GG	TG	TT	GT	GA	CC	24
1632082	TT	GG	TT	CC	GG	TT	TT	AA	CC	TT	GA	TA	GA	GT	CC	GG	GA	CC	44
1632083	TT	GG	CT	CC	TT	CT	GT	GA	CT	TT	GG	AA	GG	GT	TT	GG	GA	TT	44
1632084	TA	GG	CT	CC	TT	CT	GT	GA	CC	TT	GG	AA	GA	GT	CC	GG	AA	CC	44
1632085	TT	TG	CT	CG	GT	CT	GG	GA	CC	TT	GG	AA	GG	GT	CT	GT	AA	CC	24
1632086	TT	GG	CT	CC	TT	CT	GT	GA	CT	TT	GA	AA	GG	GT	CT	GG	GG	TT	44
1632087	TT	GG	CT	CC	TT	TT	GG	GA	TT	TT	GA	AA	GA	TG	CC	GG	GA	CT	24
1632088	TA	GG	CC	CC	TT	CC	TT	GG	CT	TT	GA	AA	GG	GT	CC	GT	AA	CC	34
1632089	TT	GG	TT	CC	TT	TT	GG	AA	CT	TT	GA	TA	GG	TT	CT	GG	AA	CC	44
1632090	TT	GG	CT	CG	TT	TT	GG	GA	CC	TT	GG	TA	GG	TT	CC	GG	GA	CC	44
1632092	TT	GG	CC	CC	TT	TT	GT	GG	CT	TT	GG	TA	GG	GG	CT	GG	AA	CC	24
1632093	TA	GG	CT	CG	GT	CT	TT	GA	CC	TT	GA	TA	GA	TG	TT	GG	AA	CC	24
1632095	TA	GG	CT	CC	TT	TT	GT	GA	CC	TT	GA	AA	AA	TT	CT	GT	AA	CT	47
1632098	TT	GG	CC	CG	TT	TT	GG	GG	CT	TT	GG	TT	GA	TT	CT	GG	GA	CT	24
1632099	TA	TT	TT	CC	TT	CT	GT	AA	CT	TT	GG	AA	GA	GT	CT	GG	AA	CT	44
1632101	AA	GG	CT	CC	GT	TT	TT	GA	CT	TT	GG	TA	GA	TT	TT	GG	GA	CT	44
1632102	AA	GG	CC	CC	TT	CT	TT	GG	TT	TT	GG	TT	GG	GG	CT	GT	AA	CC	44
1632103	TT	TG	CT	CC	TT	TT	TT	GA	CT	TT	GA	TT	GG	GG	TT	GG	GA	CC	44
1632104	TA	GG	CT	CC	GT	CT	GG	GA	CT	TT	GG	AA	GA	TG	TT	GT	GG	CC	46
1632105	TT	GG	CT	CC	GT	CT	GT	GA	TT	TT	GA	TT	GG	GT	CC	GT	GG	CT	44
1632106	TT	GG	CT	CG	GT	TT	GT	GA	CT	TT	GG	AA	GG	TT	CT	GG	GA	CC	24
1632107	TA	GG	TT	CC	TT	TT	GG	AA	TT	TT	GA	AA	GA	GT	TT	GG	AA	TT	44
1632114	TA	GG	CT	CC	TT	TT	GT	GA	TT	TT	GG	AA	GG	GT	CT	GG	GA	CC	24
1632115	TT	GG	TT	CC	GT	TT	GT	GA	CT	TT	GG	AA	GG	GG	CT	GG	AA	CC	44
1632116	TT	GG	CT	CC	TT	CT	GT	GA	TT	TT	GG	AA	GG	TG	CC	GT	GA	CT	24
1632117	TA	GG	CT	CC	GT	TT	GG	GA	TT	TT	GA	TA	GA	GT	CC	GG	GA	CT	24
1632118	TT	TG	CC	CG	GT	CT	GT	GG	TT	TT	GG	TA	GA	GT	CT	GG	AA	CT	24
1632119	TA	GG	CC	CG	TT	TT	GT	GG	CT	TT	GG	TA	GA	GT	CC	GG	GA	CT	22
1632120	AA	GG	CC	CC	TT	TT	GT	GG	TT	TT	GG	TT	GG	TT	CC	GG	GG	CC	44
1632121	TT	GG	CT	CC	TT	TT	TT	GA	TT	TT	GA	TA	GG	GT	CT	GT	AA	CC	44
1632122	TT	GG	CT	CC	TT	CT	GG	GA	CT	TT	GA	TA	GA	TT	CC	GG	GA	TT	24
1632123	TA	GG	CC	CC	GT	CT	GT	GG	TT	TT	GG	TA	GG	TT	CT	GG	GA	CC	22
1632124	TT	GG	TT	CC	GT	TT	GG	AA	TT	TT	GG	TA	GA	GT	CC	GT	AA	CC	34
1632125	TT	TG	CT	CC	TT	CT	GG	GA	CC	TT	GA	AA	GA	TT	TT	GG	AA	CT	44
1632126	TT	GG	CT	CC	GT	TT	GG	GA	CT	TT	GG	TT	AA	GT	CC	GG	GA	CT	44
1632127	TT	GG	CC	CC	TT	CT	GG	GG	CC	TT	GG	TT	GG	GT	CT	GG	GA	CT	24
1632128	TT	GG	CC	CC	GT	TT	TT	GG	TT	TT	GA	TA	GA	TG	CT	GG	GA	CT	44
1632130	TA	GG	TT	CG	TT	CT	GT	GA	TT	TT	GA	AA	GG	TT	CT	GT	AA	CC	24
1632131	TT	GG	TT	CC	GT	TT	GT	AA	TT	TT	GG	TA	GA	TT	CC	GT	GA	CT	44
1632132	TT	GG	CC	CC	GT	CT	GT	GG	CT	TT	GA	AA	GG	TG	TT	GT	GA	CC	44
1632133	TA	GG	CC	CC	TT	CT	TT	GG	CT	TT	GG	TA	GA	TT	CT	GG	GG	CT	22
1632134	TT	GG	TT	GG	TT	CT	GG	AA	CT	TT	GA	TT	GA	TT	CC	GG	AA	CT	44
1632135	TA	TG	CC	CG	TT	CC	GT	GG	CC	TT	GA	TT	GG	TT	TT	GG	AA	CC	24
1632136	TT	TG	CC	CC	TT	TT	TT	GG	CT	TT	GG	TA	GA	TT	CC	GG	GA	CC	24
1632137	TT	GG	CC	CG	TT	CT	GT	GG	CC	TT	GG	TA	GG	TG	CT	GT	GA	CT	44
1632138	TT	TG	CT	CC	GT	TT	GT	GA	CT	TT	GG	AA	GG	GG	CT	GT	AA	TT	24
1632139	TT	TG	CC	CC	GT	TT	GT	GG	TT	TT	GG	TT	GA	GG	CC	GG	AA	CC	24
1632145	TA	GG	CT	CG	GT	TT	GT	GA	CT	TT	GG	AA	GG	TT	CC	GG	AA	CC	24
1632156	TT	GG	CT	CC	TT	CT	TT	GA	TT	TT	GA	TA	GG	GT	CT	GG	GA	CT	44
1632157	TT	GG	CC	CG	TT	CC	GG	GG	CT	TT	GG	TT	GG	GT	CT	GG	AA	CC	44
1632159	TT	TG	TT	CC	TT	CC	GT	AA	TT	TT	GG	TT	GA	GT	CT	GG	GA	CT	24
1632161	TA	GG	CC	CC	GT	TT	GT	GG	CT	TT	GA	AA	GG	GT	CT	GG	AA	CT	44
1632162	TT	TG	CC	CC	TT	TT	TT	GG	CT	TT	GG	TA	GG	GG	CT	GT	GA	CC	44
1632163	AA	TG	CT	CC	TT	CT	TT	GA	CC	TT	GG	TA	GA	GT	CT	GG	AA	CT	47
1632164	TA	GG	CT	CC	GT	TT	TT	GA	CC	TT	GA	TA	GG	GG	CT	GG	GG	CT	44
1632165	TT	GG	CC	CC	TT	CT	GT	GG	CC	TT	GG	TT	GG	GT	CT	GG	AA	CT	44
1632166	TT	GG	CT	CG	GT	CT	GT	GA	TT	TT	GA	TA	GA	TT	CC	GG	GA	CT	24
1632167	TT	GG	CC	CC	GG	CT	GG	GG	CC	TT	GG	TT	GA	TT	TT	GG	GA	CT	44
1632168	TT	TG	TT	CC	TT	TT	TT	AA	CT	TT	GG	TT	GG	TT	CC	GG	GA	CT	24
1632169	TT	GG	CC	CG	GT	CT	TT	GG	TT	TT	GG	TA	GG	GT	CT	GG	GA	CC	44
1632170	TA	GG	TT	CC	TT	TT	TT	AA	TT	TT	GG	TA	GG	GG	CT	GG	GA	CC	24
1632171	TT	GG	CT	CC	TT	CT	GT	GA	CC	TT	GA	TA	GA	GT	CT	GG	AA	CT	45
1632173	TT	TG	CC	CC	TT	TT	GG	GG	CT	TT	GG	TT	GA	TT	CT	GG	GG	CC	24
1632174	AA	GG	CT	CC	TT	CT	GT	GA	CT	TT	GG	TA	GG	GG	CT	GG	AA	CT	44
1632175	TT	GG	CC	CG	TT	TT	GG	GG	CT	TT	AA	TT	GG	TG	CC	GG	GA	CT	24
1632176	TA	GG	CT	CC	TT	TT	GG	GA	CT	TT	GG	TA	GA	GT	CT	GT	GA	CC	24
1632177	TT	GG	CC	CC	TT	TT	TT	GG	TT	TT	GA	AA	GA	GT	CT	GT	AA	CT	44
1632179	TT	GG	CC	CC	GT	TT	GG	GG	TT	TT	GA	TA	GA	TT	TT	GG	GA	CT	24
1632180	TT	GG	CT	CC	TT	CT	GG	GA	CT	TT	GA	TA	GG	TT	TT	GG	GA	CT	44
1632181	TT	TG	CT	CC	TT	TT	GT	GA	CT	TT	GG	TA	GA	GT	CT	GG	GA	CT	44
1632182	TT	GG	CT	CC	TT	TT	GT	GA	CT	TT	GG	AA	GG	TG	CT	GG	GA	CT	44
1632184	TT	GG	CT	CC	TT	CT	GT	GA	TT	TT	GA	TT	GG	GG	CT	GT	AA	CC	48
1632185	TA	TG	CC	CC	TT	CT	GT	GG	CC	TT	GA	TA	GA	TT	CT	GG	AA	CT	46
1632186	TA	TG	CC	CC	TT	TT	TT	GG	CT	TT	GG	TT	AA	TT	CT	GT	AA	TT	24
1632187	TA	GG	CC	CG	TT	CT	GG	GG	CT	TT	GG	TT	GG	GT	TT	GG	AA	TT	24
1632188	TT	GG	CT	CC	GT	CT	GT	GA	CT	TT	GG	TA	GA	TT	TT	GG	GA	CT	44
1632189	TA	GG	CT	CC	GT	TT	GT	GA	TT	TT	GA	TA	GG	GG	CT	GG	GA	CT	24
1632190	TT	GG	CC	CC	GT	TT	GT	GG	TT	TT	GA	TA	GG	TT	TT	GG	AA	CC	44
1632191	TT	GG	CC	CC	TT	TT	GG	GG	CT	TT	GG	AA	GG	GG	TT	GG	GA	CT	24
1632192	TT	GG	TT	CC	GT	TT	GG	AA	TT	TT	GG	TA	GA	GT	CC	GG	AA	CC	24
1632193	TT	GG	TT	CC	GT	CC	GT	AA	TT	TT	GA	AA	GA	TT	CT	GG	GA	CT	44
1632199	TA	GG	CT	CG	TT	TT	GG	GA	CT	TT	GA	AA	GG	GT	CT	GG	AA	CC	44
1632200	TT	TG	CT	CC	TT	TT	TT	GA	CT	TT	GA	AA	GG	GT	CC	GG	AA	CC	24
1632210	TT	GG	CT	CC	TT	TT	GT	GA	CT	TT	GA	TT	GA	TG	CT	GG	GG	TT	24
1633801	TA	TG	CC	CC	TT	TT	GG	GG	CC	TT	GG	TA	GG	GT	CC	GT	GA	TT	24
1633802	TT	GG	CC	CC	TT	TT	GT	GG	CT	TT	GG	TA	GG	TT	TT	GG	GA	CC	44
1633803	TA	GG	TT	CC	TT	TT	GT	AA	CC	TT	GG	AA	AA	GT	TT	GG	GA	CC	44
1633804	TT	GG	CT	CC	TT	TT	TT	GA	CC	TT	GA	AA	AA	GT	CT	GG	GA	CT	45
1633805	TT	GG	CT	CC	TT	TT	GG	GA	CT	TT	GA	AA	GG	GT	CC	GT	AA	CC	44
1633806	AA	GG	TT	CC	TT	TT	GT	GA	CC	TT	GA	TT	GA	TT	CT	GT	AA	CT	24
1633807	TT	GG	TT	CC	TT	CT	GT	AA	TT	TT	GG	TA	GG	TT	CT	GG	GA	CT	44
1633808	TT	GG	CT	CC	TT	TT	GT	GA	CC	TT	GA	AA	GA	TT	CC	GG	GA	TT	44
1633809	TT	GG	CC	CC	GT	TT	GG	GG	CT	TT	GA	TA	GG	GT	CT	GG	AA	CT	44
1633810	TT	GG	CT	CC	TT	TT	TT	GA	CC	TT	GG	AA	GG	TT	CT	GG	GA	TT	44
1633811	TT	GG	CC	CC	TT	CT	GT	GG	CC	TT	AA	AA	GG	GG	CC	GG	GG	TT	44
1633812	TT	GG	CT	CG	GT	CC	GT	GA	CC	TT	GA	TT	GG	TT	CT	GG	AA	CC	44
1633813	TT	GG	TT	CC	TT	CT	GT	AA	CT	TT	GG	TT	GG	TT	CT	GG	AA	CC	24
1633814	TT	GG	CT	CC	TT	CT	GG	GA	TT	TT	GG	TT	GA	TT	CT	GG	GG	CT	44
1633815	TT	GG	CC	CC	TT	TT	GT	GG	CT	TT	GG	TA	GG	GT	CT	GG	GA	CC	24
1633816	TT	GG	CC	CC	TT	CT	GT	GG	CT	TT	GA	TA	GG	GT	CT	GT	AA	CC	46
1633817	TT	GG	CC	CC	TT	TT	GT	GG	CT	TT	GA	AA	GA	TT	TT	GG	GA	CT	24
1633818	TT	GG	CC	CC	TT	TT	GG	GG	CC	TT	GG	AA	GG	GT	CC	GT	AA	CC	44
1633819	TT	GG	CC	CG	TT	TT	GT	GG	TT	TT	GA	TT	GG	TT	CT	GG	AA	CC	44
1633820	TT	GG	CT	CC	GT	CT	GT	GA	CC	TT	AA	TT	GG	GG	TT	GG	GA	CC	44
1633821	TT	TG	CT	CC	TT	TT	GG	GA	CT	TT	GG	AA	GA	TT	TT	GG	AA	CT	44
1633822	TT	GG	CC	CC	GT	TT	GG	GG	TT	TT	AA	TT	GA	GT	CT	GG	GA	CT	44
1633823	TT	TG	CT	GG	TT	CT	GT	GA	CC	TT	GG	AA	GG	GG	CT	GG	GA	CT	44
1633824	TA	GG	CC	CC	GT	CT	GT	GG	CT	TT	GA	TA	GG	GT	CT	GT	GG	CC	24
1633825	TT	GG	CT	CC	TT	CT	TT	GA	CT	TT	GG	AA	GA	GT	CT	GG	AA	TT	44
1633826	TA	GG	CT	CC	TT	TT	TT	GA	CT	TT	GG	TT	AA	GT	TT	GG	AA	CT	24
1633827	TT	GG	CC	CC	TT	CT	GG	GG	TT	TT	GG	TA	GG	GT	TT	GG	AA	CC	24
1633828	TA	GG	CT	CG	TT	TT	TT	GA	CC	TT	GG	AA	GA	TT	CC	GT	GA	CC	34
1633829	TA	GG	CT	CC	GT	CT	GT	GA	CT	TT	GG	TA	GG	GG	TT	GG	AA	CC	24
1633830	TT	GG	CT	CC	GT	CT	GT	GA	CT	TT	GA	TA	GG	GT	CC	GG	AA	TT	24
1633831	AA	GG	CC	CC	TT	TT	GT	GG	CC	TT	GA	AA	GG	GG	TT	GT	GA	CC	44
1633832	TT	GG	CT	CC	GT	TT	GT	GA	CC	TT	GA	TA	GG	GT	CT	GG	GA	CC	44
1633833	TA	GG	CT	CC	GT	TT	GT	GA	CT	TT	GG	TA	GG	GT	CT	GG	AA	CC	44
1633834	TA	TG	CT	CC	TT	CT	GT	GA	CT	TT	GG	AA	GG	TT	TT	GT	AA	CC	44
1633835	TT	GG	CT	CC	GT	CT	GT	GA	CT	TT	GG	TT	GG	GG	TT	GG	GA	TT	24
1633836	TA	GG	TT	CG	TT	TT	GG	AA	CC	TT	GA	TA	GG	TG	CT	GG	AA	CT	44
1633837	TT	GG	CC	CC	GT	TT	GT	GG	CT	TT	GG	TT	GG	GT	CT	GG	GA	CC	45
1633838	TT	GG	CT	CC	GT	CT	GG	GA	CT	TT	GG	TA	GG	TT	CT	GG	GA	CC	44
1633839	TA	GG	CC	CC	TT	TT	GG	GG	CC	TT	GG	TA	GA	GT	TT	GG	AA	CC	44
1633840	TT	GG	CT	CC	GT	TT	TT	GA	CT	TT	GA	AA	GG	GT	CT	GG	GG	CT	24
1633841	TT	GG	TT	CC	TT	TT	GG	AA	TT	TT	GG	AA	GG	GT	CT	GG	AA	CT	44
1633842	TT	GG	CC	CC	TT	CT	GT	GG	TT	TT	GG	AA	GG	GT	TT	GT	GA	CC	44
1633843	AA	GG	CT	CG	TT	TT	GT	GA	CT	TT	GG	TA	GA	TT	CC	GT	GA	CT	44
1633844	TA	TG	TT	CC	TT	CT	GG	AA	CC	TT	GA	AA	GG	GT	CC	GG	GG	CT	44
1633845	TA	GG	CT	CC	GT	CT	TT	GA	TT	TT	GG	TT	GA	TT	CT	GG	AA	CC	44
1633846	TA	GG	TT	CC	GG	TT	TT	AA	CT	TT	GA	TT	GA	GT	CC	GG	GA	CC	44
1633847	TT	GG	TT	CC	TT	TT	GT	GA	CT	TT	GG	TA	GG	GG	CC	GG	AA	CT	44
1633848	TT	GG	CC	CG	TT	CT	TT	GG	TT	TT	GA	TA	GG	GT	TT	GG	GA	CT	24
1633849	TT	TG	TT	CC	TT	TT	TT	AA	CT	TT	GG	TA	GG	GT	CT	GG	AA	CC	44
1633850	TT	GG	CC	CC	GT	TT	GT	GG	CT	TT	GG	TT	GG	GT	CT	GG	GA	CT	55
1633851	TA	GG	CC	CC	TT	CT	GT	GG	CT	TT	GG	TA	GA	TT	CT	GT	GA	CT	23
1633852	TT	GG	CT	CC	GT	TT	GG	GG	CC	TT	GG	TT	GG	GG	CT	GG	GA	CT	44
1633853	TT	GG	TT	CC	TT	TT	GT	AA	CT	TT	GG	AA	GG	GG	TT	GG	AA	CT	44
1633854	TA	TG	CT	CG	TT	TT	TT	GA	TT	TT	GG	TA	GG	GG	CT	GG	AA	TT	44
1633855	TA	GG	CT	CG	TT	CT	GG	GA	TT	TT	GG	TA	GA	GT	CT	GG	AA	TT	44
1633856	TT	GG	CC	CC	TT	CT	TT	GG	TT	TT	GG	TA	GA	GT	CC	GG	GA	CT	24
1633857	TA	GG	CT	CC	TT	TT	GT	GA	TT	TT	GG	AA	GG	GG	CT	GG	AA	CC	24
1633858	TT	GG	CC	CC	TT	TT	TT	GG	CT	TT	GG	TA	GG	GG	CT	GG	AA	CT	44
1633859	TT	TG	CC	CC	GG	TT	GG	GG	TT	TT	GA	TA	GG	GT	TT	GG	GA	CC	44
1633860	TA	GG	CC	CC	TT	TT	TT	GG	CC	TT	GG	TA	GG	GT	CC	GG	AA	CC	24
1633861	TT	GG	CT	CC	TT	TT	GT	GA	CC	TT	GG	TT	GG	GT	CT	GG	GA	CT	27
1633862	TA	GG	CT	CC	TT	CT	GT	GA	CT	TT	GA	TA	AA	TT	CC	GT	GA	CC	44
1633863	TT	GG	CT	CC	GT	TT	GT	GA	TT	TT	GG	TA	GA	GT	CT	GT	GA	TT	24
1633864	TT	TG	CT	CC	TT	TT	GG	GA	TT	TT	GA	TT	GG	GG	CT	GG	GA	CC	44
1633865	TA	GG	TT	CC	TT	TT	GT	AA	CC	TT	GG	TA	GG	GT	CT	GG	AA	CC	24
1633866	TA	GG	CC	CG	TT	CT	GT	GG	CT	TT	GA	TT	GA	TT	TT	GT	GA	CT	44
1633867	TT	GG	CT	CC	TT	CT	GG	GA	CC	TT	GG	TT	GG	TT	CT	GG	AA	CT	44
1633868	TT	GG	TT	CC	TT	TT	GT	GA	CT	TT	GA	TA	GG	GT	CC	GG	AA	TT	24
1633869	AA	TG	TT	CC	TT	CC	GT	AA	CT	TT	GA	AA	GG	GG	CT	GT	AA	CT	44
1633870	TT	TG	CT	CC	TT	CC	TT	GA	CT	TT	GA	AA	GA	TT	TT	GG	GA	CC	44
1633871	TT	GG	CT	CC	TT	TT	GT	GA	CT	TT	GG	TT	GG	TT	CC	GG	AA	CT	44
1633872	TT	TT	CC	CC	TT	CT	TT	GG	CT	TT	GG	TT	GA	TT	CT	GG	AA	CT	24
1633873	TA	TG	CC	CC	GT	CC	GT	GG	CT	TT	GG	TA	GA	TT	CC	GT	AA	CT	44
1633874	TT	GG	CC	CC	TT	TT	GT	GG	CT	TT	GG	TA	GA	GT	CT	GG	AA	CC	44
1633875	TA	GG	CT	CC	TT	TT	TT	GA	TT	TT	GG	TA	GA	GT	CC	GG	AA	CT	44
1633876	TT	GG	TT	CG	TT	CT	GG	AA	CC	TT	GG	TT	GA	TT	CT	GT	GA	CC	44
1633877	TT	GG	CC	CC	TT	CT	TT	GG	TT	TT	GA	TA	GG	TG	CT	GG	AA	CT	24
1633878	TT	GG	TT	CC	TT	CT	GT	AA	TT	TT	GG	TA	GA	GT	TT	GG	AA	CT	24
1633879	TA	GG	CT	CC	TT	TT	GG	GA	CT	TT	GG	AA	GG	GG	TT	GG	AA	TT	22
1633880	TA	GG	CT	CC	TT	TT	GG	GA	CC	TT	GA	TA	GA	GT	TT	GG	AA	CT	26
1633881	TT	GG	CT	CC	GT	TT	GG	GA	TT	TT	GG	TA	GA	TT	CC	GT	AA	CC	44
1633882	TT	GG	CC	CC	GT	TT	GT	GG	TT	TT	GG	TT	GA	GT	CT	GT	AA	CT	24
1633883	TT	GG	CC	CC	TT	TT	GT	GG	CT	TT	GG	TA	GG	TT	CC	GG	AA	CC	24
1633884	TA	GG	CT	CC	TT	TT	GT	GA	CC	TT	GG	AA	GA	GT	CT	GG	GA	TT	45
1633885	TT	GG	CC	CC	TT	TT	GT	GG	CC	TT	GG	TA	GG	GG	TT	GT	AA	CC	44
1633886	TA	TG	CT	CC	TT	CT	TT	GA	CC	TT	GA	AA	GG	GT	CT	GT	AA	CC	24
1633887	TT	GG	TT	CC	TT	CC	GG	GA	CT	TT	AA	TT	GA	GT	TT	GG	GA	CC	44
1633888	TT	GG	CC	CC	TT	TT	GT	GG	TT	TT	GG	TA	GA	GT	TT	GG	AA	CC	44
1633889	TT	GG	CT	CC	TT	CT	GT	GA	TT	TT	GA	TT	GG	TT	CT	GG	GG	CC	45
1633890	TT	GG	CT	CC	GT	TT	GT	GA	CC	TT	GG	TT	GG	GT	CT	GG	GA	CT	44
1633891	TA	GG	TT	CC	GT	TT	GG	AA	CC	TT	GA	TA	GA	GT	CT	GG	AA	TT	44
1633892	TA	GG	CC	CC	GT	TT	TT	GG	CT	TT	GG	TA	GG	GT	TT	GG	GA	CT	44
1633893	TT	GG	CT	CC	GG	TT	GT	GA	CC	TT	GA	TA	GA	GT	CC	GT	AA	CT	24
1633894	TA	GG	CT	CC	TT	TT	TT	GA	CC	TT	GG	AA	GA	TG	TT	GG	GA	CC	24
1633895	AA	GG	CT	CC	TT	CC	TT	GA	CC	TT	GA	TA	GA	GT	TT	GG	AA	CC	24
1633896	TT	GG	CT	CG	TT	CT	GG	GG	CT	TT	GG	AA	GG	TT	CT	GG	AA	CC	44
1633897	TT	GG	CT	CC	GG	CT	GT	GG	CT	TT	GG	TA	GA	GT	TT	GT	AA	CT	24
1633898	TT	TG	CT	CC	TT	TT	GG	GA	CT	TT	AA	TA	GG	GT	CT	GG	AA	CT	44
1633899	TT	GG	CC	CC	TT	CC	GT	GG	CC	TT	GG	AA	GA	TT	CT	GG	GG	TT	24
1633900	TT	GG	CT	CG	TT	CT	GT	GA	TT	TT	GG	AA	GG	GT	TT	GG	GA	CT	26
1633901	TT	GG	TT	CC	TT	TT	GT	AA	CT	TT	GG	TA	GG	GT	CC	GG	GG	TT	44
1633902	TT	GG	CC	CC	TT	CT	GT	GG	TT	TT	GA	TT	GA	GT	CC	GG	AA	CC	44
1633903	TA	GG	CC	CG	GT	TT	GT	GG	CT	TT	GA	TA	GG	GG	CT	TT	GA	CT	44
1633904	TA	GG	CT	CG	TT	TT	GG	GA	CC	TT	GG	TA	GG	GT	CT	GG	GA	TT	24
1633905	TT	GG	CC	CG	GT	TT	TT	GG	TT	TT	GA	AA	GG	GG	CT	GG	GA	CT	44
1633906	TT	GG	CT	CC	GT	TT	GT	GA	CT	TT	GG	AA	GA	TT	CC	GG	AA	CT	44
1633907	TT	GG	CC	CC	GT	TT	GG	GG	CT	TT	GG	TA	GG	TT	TT	GG	AA	CC	24
1633908	TT	GG	CC	CC	TT	CT	TT	GG	CT	TT	GG	TA	GA	TT	CT	GT	GA	CC	24
1633909	TT	GG	CC	CC	TT	CT	GT	GG	CT	TT	GG	TA	GG	GT	CT	GG	GG	CC	44
1633910	TT	GG	TT	CC	TT	CT	GT	AA	CT	TT	GA	TA	GA	GT	CT	GT	AA	TT	24
1633911	TA	TG	CT	CC	TT	TT	TT	GA	TT	TT	GA	TT	GA	TT	CT	GG	GA	CT	44
1633912	TT	GG	TT	CC	TT	CC	GT	AA	CT	TT	GG	TA	GG	GG	CT	GG	GA	CT	44
1633913	TT	GG	CT	CC	TT	TT	TT	GA	TT	TT	GG	TT	GA	GG	CT	GG	GG	CT	24
1633914	TA	GG	CT	CC	TT	CT	TT	GA	CT	TT	GA	TA	GA	GG	CT	GG	AA	CT	44
1633915	TT	GG	CT	CG	TT	TT	GT	GA	CT	TT	GA	TT	GG	GT	TT	GG	GA	CC	44
1633916	TA	GG	CT	CC	TT	TT	GT	GA	CT	TT	GA	TT	GA	GT	CT	GG	GA	CC	25
1633917	TT	GG	CT	CC	GT	TT	TT	GA	TT	TT	GG	AA	GG	GT	CT	GT	AA	TT	44
1633918	TT	GG	CT	CC	GT	CT	GT	GA	CT	TT	GA	TA	GG	GT	CT	GG	AA	CC	44
1633919	TT	GG	CT	CC	GT	CC	GG	GA	CT	TT	GG	TA	GG	GT	CC	GG	GA	CC	24
1633920	TT	GG	CT	CC	TT	TT	GG	GA	CT	TT	GG	TT	GA	GT	CC	GG	AA	TT	24
1633921	TT	GG	TT	CC	TT	TT	GT	AA	TT	TT	GG	TA	GG	GG	CT	GG	GA	CC	24
1633922	TT	GG	CC	CC	TT	CT	GT	GG	TT	TT	GG	TA	GA	TT	CT	GG	GG	CC	44
1633923	TT	GG	CC	CC	TT	TT	GG	GG	CT	TT	GG	TA	GA	GT	CT	GT	GA	CT	44
1633924	TT	GG	CT	CC	TT	CT	GG	GA	TT	TT	AA	TT	GA	TT	TT	GG	GA	CT	34
1633925	TT	GG	CT	CC	TT	CT	GT	GA	TT	TT	GG	TA	GA	GT	CC	GG	AA	CT	44
1633926	TT	GG	CC	CC	GT	TT	GG	GG	TT	TT	GG	AA	AA	TT	CT	GT	AA	CT	44
1633927	TA	GG	CC	CG	TT	TT	GT	GG	CT	TT	GA	AA	GG	TT	TT	GG	AA	CC	44
1633928	TA	GG	TT	CC	TT	TT	GG	AA	CT	TT	GG	TT	GA	TG	TT	GT	AA	TT	44
1633929	TT	GG	TT	CC	GT	TT	GG	AA	TT	TT	GG	TA	GG	TG	CT	GG	GA	CC	22
1633930	TA	GG	CC	CC	TT	TT	GG	GG	CC	TT	GA	TA	GA	TT	CC	GG	AA	TT	24
1633931	TT	GG	CC	CC	TT	TT	TT	GG	CT	TT	GA	TT	GG	GG	TT	GT	AA	CC	22
1633932	TT	GG	TT	CG	TT	TT	TT	AA	CT	TT	GG	TT	GG	GT	TT	GT	AA	CT	34
1633933	TT	GG	CT	CC	GT	TT	GG	GA	TT	TT	GG	TA	GG	GG	CT	GG	AA	CC	44
1633934	TA	GG	CT	CC	TT	TT	GT	GA	CT	TT	GA	TA	GG	GG	CT	GT	GA	CT	22
1633935	TT	TG	CT	CG	TT	TT	TT	GA	CT	TT	GG	TA	GG	GG	CC	GG	GA	CT	44
1633936	TT	TG	CT	CG	GT	CT	GT	GG	CT	TT	GG	TT	GG	GG	CT	GG	AA	CC	44
1633937	TA	GG	CT	CG	TT	TT	GG	GA	CC	TT	GA	TA	GA	TT	CC	GG	GA	CC	44
1633938	TA	GG	CT	CC	TT	CT	GT	GA	TT	TT	GG	TA	GG	GT	TT	GG	AA	CT	44
1633939	TT	TG	CC	CC	TT	TT	GG	GG	CT	TT	GG	TA	GG	GG	CT	GG	GA	TT	34
1633940	TA	GG	CT	CC	TT	CT	TT	GA	CT	TT	GG	TA	AA	GT	CT	GG	GA	CC	24
1633941	TT	TG	TT	CG	GT	CT	GG	AA	CT	TT	AA	TA	GG	GG	CT	GG	AA	TT	22
1633942	TT	GG	TT	CC	TT	TT	TT	AA	CT	TT	GG	AA	GG	TT	TT	GT	GA	CT	24
1633944	TT	GG	TT	CC	TT	TT	GT	AA	TT	TT	GA	TA	GA	GT	TT	GG	GA	CT	44
1633945	TT	GG	CT	CC	TT	TT	TT	GA	CT	TT	GA	AA	GG	GT	CT	GG	GA	CC	22
1633946	TT	GG	CT	CC	TT	CT	GT	GA	TT	TT	GG	AA	AA	TT	CT	GG	GA	CC	23
1633947	TT	GG	CC	CC	TT	TT	GT	GG	TT	TT	GA	AA	GG	TT	CT	GT	AA	CC	44
1633948	TT	TG	CC	CC	TT	CT	GG	GG	TT	TT	GG	AA	GG	GG	CT	GG	AA	CC	44
1633949	TA	GG	CC	CC	GT	CT	GG	GG	CT	TT	GG	AA	GG	TT	CT	GG	GA	CT	44
1633950	TA	GG	CC	CC	TT	CT	TT	GG	CT	TT	GA	AA	GA	GT	CC	GG	AA	CT	44
1633951	TT	GG	TT	CC	TT	TT	GT	AA	TT	TT	GG	TA	GA	GT	CT	GT	GA	CT	45
1633952	TT	GG	CC	CC	TT	TT	TT	GG	CC	TT	GG	TA	GG	GT	CT	GG	GA	CC	44
1633953	TT	GG	CC	CC	TT	CT	GT	GG	CT	TT	GG	TT	GG	GT	CT	GT	GA	CT	24
1633954	TA	GG	CT	CC	TT	TT	GT	GA	TT	TT	GG	TA	GG	GG	CC	GG	AA	CC	24
1633955	TT	GG	TT	CC	TT	CT	GG	AA	CT	TT	GG	TT	GG	TG	CT	GG	GA	CT	24
1633956	TT	GG	CT	CC	TT	TT	TT	GA	CT	TT	GG	TA	AA	TT	TT	GT	AA	CT	44
1633957	TT	TG	CC	CC	GT	CT	TT	GG	CC	TT	GA	TA	GA	TG	TT	GG	GA	CT	44
1633958	TA	GG	CT	CC	TT	CT	GG	GA	CT	TT	GA	TA	GA	GT	CT	GG	AA	CT	44
1633959	AA	GG	CC	CC	TT	TT	GG	GG	CC	TT	GG	TA	GG	GT	TT	GG	GA	CC	24
1633960	TT	GG	TT	CC	TT	TT	TT	AA	TT	TT	GG	AA	AA	TT	CC	GG	GA	CC	44

## Sheet: paper-and-pencil
ID	UUT_original_newspaper	UUT_flexibility_newspaper	UUT_fluency_newspaper	UUT_original_bottle	UUT_flexibility_bottle	UUT_fluency_bottle	RAT
1632001	6	5	10	10	6	11	10
1632002	3	3	8	5	5	9	13
1632003	7	4	13	4	8	10	10
1632004	5	4	11	13	7	17	8
1632005	4	5	10	4	5	9	11
1632006	7	5	14	8	7	14	11
1632007	11	5	19	9	7	16	12
1632008	9	5	10	13	7	9	2
1632009	14	5	19	8	8	13	13
1632010	9	4	12	9	6	13	11
1632011	13	5	17	9	10	15	12
1632012	7	6	11	8	6	11	8
1632013	5	3	10	8	6	13	11
1632014	2	4	6	4	6	7	11
1632015	13	5	16	14	6	17	8
1632016	3	3	5	5	5	6	8
1632017	4	3	5	3	3	6	9
1632018	3	4	7	5	4	6	11
1632019	4	3	6	4	5	8	10
1632020	7	6	14	13	10	20	13
1632021	6	3	11	13	9	18	13
1632022	6	3	8	7	6	10	14
1632023	1	3	7	5	7	7	11
1632024	4	4	11	9	9	14	13
1632025	8	4	13	10	7	14	11
1632026	7	4	16	13	7	15	14
1632027	5	5	10	11	5	14	10
1632029	9	4	11	7	7	11	10
1632030	9	5	17	13	9	21	13
1632031	8	5	11	3	8	10	8
1632032	6	3	12	6	6	10	11
1632033	4	4	9	5	5	8	11
1632034	3	3	10	3	7	10	13
1632035	4	3	9	8	6	11	12
1632036	9	4	15	5	5	8	14
1632037	3	4	8	6	7	12	12
1632038	4	5	12	9	7	13	12
1632039	3	3	8	6	8	11	13
1632040	7	5	11	12	9	17	10
1632041	5	2	7	5	5	9	12
1632042	9	4	14	14	3	16	8
1632043	0	2	4	3	4	4	12
1632044	1	4	8	3	6	9	14
1632045	1	4	9	5	7	12	13
1632046	4	4	13	4	6	10	13
1632048	3	3	6	7	7	8	13
1632050	2	4	6	5	6	9	7
1632051	3	3	8	8	6	10	12
1632052	4	4	9	7	4	11	14
1632053	7	4	10	6	3	7	12
1632054	7	3	10	9	8	13	12
1632055	12	6	17	18	8	23	9
1632056	3	5	8	6	6	10	9
1632057	4	3	6	4	5	10	7
1632058	3	5	9	12	5	15	8
1632059	4	3	8	4	4	6	11
1632060	7	6	13	9	8	11	8
1632061	10	4	14	8	6	12	11
1632062	22	5	25	10	8	15	5
1632063	9	3	11	6	5	10	11
1632064	7	4	11	6	5	13	10
1632065	8	5	16	13	10	16	10
1632066	8	6	12	8	8	14	12
1632067	2	4	7	3	5	6	12
1632068	15	6	20	19	9	24	9
1632069	11	5	16	8	7	11	11
1632070	7	5	13	8	8	13	15
1632071	7	5	10	11	6	13	13
1632072	10	4	16	8	5	12	15
1632073	3	5	9	6	6	12	12
1632074	14	3	17	11	4	13	10
1632075	8	4	11	14	1	14	10
1632076	7	4	8	5	7	10	8
1632077	6	5	12	9	8	15	9
1632078	7	6	11	9	6	15	6
1632079	8	4	11	9	6	15	3
1632080	2	3	5	6	5	9	12
1632081	5	3	9	6	8	12	13
1632082	2	3	6	3	5	8	11
1632083	9	4	15	11	7	16	9
1632084	7	6	11	8	8	12	12
1632085	2	5	7	4	6	8	10
1632086	3	4	10	3	6	10	11
1632087	5	4	11	10	7	13	9
1632088	3	5	11	6	6	14	10
1632089	3	4	7	4	7	7	12
1632090	5	5	12	3	7	10	13
1632092	10	4	16	15	9	21	6
1632093	0	2	3	4	4	5	11
1632095	5	6	9	4	7	9	13
1632098	3	4	9	4	6	6	8
1632099	2	5	6	6	5	8	11
1632101	3	5	9	3	6	8	10
1632102	12	5	16	12	7	16	12
1632103	6	5	10	4	9	11	12
1632104	9	5	13	8	8	13	10
1632105	6	3	9	12	7	14	12
1632106	4	5	7	3	3	6	4
1632107	8	5	13	13	6	18	11
1632114	6	4	11	4	6	8	10
1632115	13	4	18	14	7	18	10
1632116	1	5	9	5	6	9	9
1632117	2	5	9	9	8	18	13
1632118	7	4	13	8	7	14	12
1632119	2	3	6	7	7	9	14
1632120	4	5	8	5	7	12	7
1632121	2	4	6	3	7	9	11
1632122	4	5	10	8	7	12	8
1632123	4	2	7	5	5	7	11
1632124	10	5	15	7	6	13	11
1632125	8	3	10	7	8	12	8
1632126	5	4	10	8	5	11	8
1632127	5	3	8	7	8	10	13
1632128	13	5	16	7	5	10	12
1632130	14	3	20	13	8	17	11
1632131	3	4	9	2	6	7	8
1632132	6	4	10	5	5	9	11
1632133	8	6	14	8	5	11	10
1632134	5	4	8	8	5	8	11
1632135	3	4	9	9	7	13	6
1632137	5	5	12	6	7	13	10
1632138	2	3	5	5	6	9	13
1632139	8	3	11	3	5	6	8
1632145	3	4	7	5	7	9	11
1632156	2	3	6	4	5	6	11
1632157	13	6	22	9	7	12	8
1632159	8	5	14	13	9	17	12
1632161	3	4	7	2	6	7	10
1632162	7	4	10	7	7	12	12
1632163	1	2	2	2	4	3	11
1632164	6	6	13	14	8	18	8
1632165	6	3	14	6	6	11	5
1632166	7	4	14	14	6	16	11
1632167	4	5	9	8	7	13	8
1632168	2	4	8	9	8	12	8
1632169	5	3	9	9	7	11	8
1632170	2	4	9	9	8	13	7
1632171	6	5	10	3	5	7	13
1632173	12	5	18	10	8	15	3
1632175	7	5	12	13	9	17	8
1632176	0	4	4	1	5	7	9
1632177	5	3	7	6	7	11	11
1632179	8	4	12	6	6	10	10
1632180	2	2	7	5	6	8	9
1632181	7	4	13	18	9	20	10
1632182	1	4	6	4	7	10	9
1632184	9	6	15	13	8	18	10
1632185	3	4	9	6	7	11	11
1632186	10	4	18	8	8	15	7
1632187	8	3	9	11	8	15	10
1632188	5	4	6	5	6	8	4
1632189	4	3	9	9	6	12	9
1632190	6	6	10	7	7	10	8
1632191	3	4	9	6	8	11	11
1632192	4	5	13	6	8	13	9
1632193	8	5	12	9	7	14	7
1632199	3	2	7	6	5	9	11
1632200	2	4	6	7	9	10	14
1632210	7	3	11	7	7	13	13
1633801	3	3	6	2	5	6	9
1633802	5	4	10	4	5	7	9
1633803	3	3	7	7	5	8	10
1633804	2	4	7	6	4	8	9
1633805	3	4	7	3	6	9	9
1633806	9	5	15	4	8	12	8
1633807	6	3	12	5	5	11	11
1633808	2	2	5	4	6	8	10
1633809	3	4	6	5	5	9	12
1633810	3	5	10	4	8	12	10
1633811	9	5	13	7	5	9	10
1633812	4	5	10	6	6	10	11
1633813	4	5	9	9	9	17	7
1633814	8	3	9	9	7	13	4
1633815	5	4	13	7	8	14	10
1633816	0	3	6	2	5	8	12
1633817	0	4	8	2	4	5	11
1633818	0	4	7	3	5	9	5
1633819	8	4	12	6	7	13	5
1633820	4	4	8	6	5	9	3
1633821	1	3	4	4	5	7	10
1633822	3	4	8	9	4	12	9
1633823	3	3	5	2	6	8	8
1633824	9	6	14	8	7	12	9
1633825	4	2	7	4	6	11	8
1633826	9	4	15	8	8	14	3
1633827	3	5	9	3	6	10	8
1633828	2	4	9	5	7	8	7
1633829	3	2	7	4	5	8	11
1633830	4	5	11	2	6	8	9
1633831	4	4	9	6	6	12	9
1633832	3	4	4	6	7	9	11
1633833	2	4	8	3	5	7	10
1633834	3	4	7	2	7	9	10
1633835	0	3	4	1	4	5	10
1633836	1	4	6	6	6	9	11
1633837	3	5	10	4	8	9	10
1633838	3	5	10	9	8	14	2
1633839	3	4	8	4	5	8	7
1633840	5	4	10	6	5	9	6
1633841	1	2	2	4	2	6	8
1633842	5	3	8	5	7	9	10
1633843	0	2	5	4	4	8	6
1633844	7	4	13	11	7	16	10
1633845	6	3	13	11	8	17	10
1633846	3	3	8	6	6	15	9
1633847	7	2	13	19	6	21	8
1633848	1	2	6	5	6	7	8
1633849	3	4	9	5	5	9	11
1633850	2	3	6	2	7	9	13
1633851	7	4	11	7	6	12	4
1633852	8	5	12	7	6	12	9
1633853	8	6	12	7	6	13	12
1633854	1	3	6	8	8	13	7
1633855	7	3	10	6	6	9	10
1633856	5	5	10	10	7	14	11
1633857	2	4	9	5	6	10	13
1633858	3	3	8	7	6	10	4
1633859	10	5	17	10	4	11	9
1633860	1	3	3	4	5	6	5
1633861	5	4	8	5	8	12	10
1633862	3	2	4	3	3	5	12
1633863	1	3	5	2	6	8	7
1633864	5	4	9	4	6	9	10
1633865	7	3	13	8	7	16	9
1633866	6	4	10	9	6	13	11
1633867	3	2	5	5	5	11	6
1633868	9	4	16	11	6	18	8
1633869	5	6	11	8	6	16	14
1633870	4	3	5	5	5	6	13
1633871	7	4	14	12	7	15	10
1633872	6	2	10	8	8	14	3
1633873	7	4	10	6	7	11	11
1633874	2	4	6	3	5	7	5
1633875	6	3	10	6	5	8	8
1633876	6	3	10	6	7	13	7
1633877	3	2	7	1	4	5	10
1633878	3	4	10	5	5	9	9
1633879	2	4	8	5	9	11	9
1633880	5	4	13	8	8	12	9
1633881	1	3	5	4	5	7	3
1633882	7	3	11	10	7	14	10
1633883	6	3	12	9	6	15	12
1633884	3	5	6	3	8	8	8
1633885	2	5	9	8	6	13	8
1633886	3	4	9	5	7	10	10
1633887	3	3	6	8	7	13	6
1633888	6	4	10	7	6	9	8
1633889	4	5	11	5	8	14	9
1633890	2	4	6	4	6	9	11
1633891	6	4	13	9	6	15	11
1633892	2	3	7	4	6	7	11
1633893	2	3	5	2	5	8	12
1633894	5	4	8	6	4	7	8
1633895	5	5	11	7	7	12	8
1633896	6	6	9	6	9	12	8
1633897	6	5	10	9	7	13	5
1633898	3	5	10	8	7	15	9
1633899	0	3	5	4	4	5	10
1633900	4	4	8	4	6	9	10
1633901	5	5	12	5	6	10	10
1633902	1	5	9	11	6	14	10
1633903	5	3	8	4	8	11	7
1633904	2	4	9	5	5	11	9
1633905	1	3	4	3	6	7	10
1633906	0	3	3	1	3	3	10
1633907	0	2	3	6	2	6	8
1633908	2	4	6	4	8	10	6
1633909	1	3	5	5	6	8	12
1633910	5	6	15	8	6	13	5
1633911	11	5	15	7	8	13	8
1633912	6	4	11	4	6	11	12
1633913	5	4	8	3	6	8	11
1633914	3	5	9	5	7	9	9
1633915	3	4	8	2	5	7	9
1633916	8	5	13	11	9	18	8
1633917	4	4	10	7	6	11	6
1633918	3	3	8	7	6	12	12
1633919	1	2	2	1	2	2	6
1633920	5	3	10	7	5	10	11
1633921	4	3	7	8	4	10	8
1633922	3	4	10	7	4	10	8
1633923	8	6	12	3	5	8	8
1633924	2	3	4	4	5	7	11
1633925	8	4	13	11	8	17	7
1633926	7	3	13	12	7	18	14
1633927	2	4	8	5	6	10	7
1633928	6	5	8	3	7	8	10
1633929	12	4	18	15	7	22	9
1633930	11	4	15	8	5	11	12
1633931	1	3	6	5	3	7	9
1633932	5	4	10	9	8	14	11
1633933	7	5	20	11	7	20	10
1633934	10	6	15	9	8	18	5
1633935	5	4	9	12	7	13	6
1633936	4	4	9	7	4	10	7
1633937	3	5	8	3	5	6	7
1633938	2	2	6	5	7	10	10
1633939	3	4	9	8	8	14	7
1633940	0	3	7	3	5	6	13
1633941	4	3	6	5	5	6	0
1633942	6	3	10	6	7	10	11
1633944	4	4	11	8	7	13	12
1633945	5	4	7	7	5	7	9
1633946	4	4	9	7	7	14	8
1633947	2	3	5	5	4	5	5
1633948	1	5	7	5	4	8	7
1633949	1	3	5	3	7	8	4
1633950	2	4	7	2	4	5	9
1633951	4	3	8	6	5	7	12
1633952	4	4	9	4	7	12	10
1633953	4	4	8	4	8	9	11
1633954	2	4	10	9	6	12	11
1633955	5	4	9	3	6	6	8
1633956	2	3	8	5	7	8	11
1633957	3	3	6	4	4	5	6
1633958	1	4	6	3	5	6	3
1633959	4	3	5	1	3	5	7
1633960	5	4	7	4	5	7	6

## Sheet: web-based scale
Sub. Num.	time(s)	intelligence	openness	agreeableness	Conscientiousness	neuroticism	extraversion	CAQ score	Attention check item (For this item, please make sure you choose "strongly disagree" )	Gender(1 = male; 2 = female)	Age	Place of birth	Handedness	Enter the current university through (1 = without examination; 2 = college entrance exam; 3 = independent recruitment bonus points)	Subject before collage(1=Art; 2= Science)	Annual household income (in 10 thousand yuan)	Father‘s education level (1 = primary school; 2 = junior high school; 3 = high school; 4 = bachelor degree; 5 = master degree; 6 = doctorial degree)	Mother‘s education level(1 = primary school; 2 = junior high school; 3 = high school; 4 = bachelor degree; 5 = master degree; 6 = doctorial degree)	Social Economic Status (score 1-9 for low to high SES)	History of mental illness(1 = No; 2 = Yes)
1632077	1539	25	43	33	46	41	39	6	5	1	18	Hubei	R	3	2	80	4	4	9	2
1632080	921	28	38	40	47	35	43	6	1	1	23	Zhejiang	R	3	2	25	3	3	5	1
1632102	2559	28	44	42	53	36	48	13	1	2	19	Jilin	R	3	2	10	4	4	6	1
1632021	813	32	39	43	38	31	44	7	1	1	20	Jiangxi	R	2	2	20	4	4	5	1
1632179	1721	29	44	49	48	34	40	21	1	2	19	Neimenggu		2	2	28	6	4	8	1
1632176	1752	16	27	45	40	36	41	4	1	1	20	Hebei	R	1	2	10	3	4	5	1
1632133	2564	32	53	43	43	28	27	8	1	2	19	Neimenggu	R	3	2	4.5	2	1	3	1
1632127	3225	34	45	44	38	46	31	5	1	2	20	Hebei	R	3	2	10	4	4	4	1
1632101	2382	29	41	42	49	43	45	7	1	2	20	Guangdong	R	2	2	48	4	4	7	1
1632180	2565	29	39	47	47	27	44	2	1	1	20	Jilin	R	3	2	10	4	4	5	1
1632159	2739	32	42	38	46	37	40	6	1	1	18	Jiangsu	R	3	2	10	4	4	7	1
1632059	2636	28	41	35	43	40	30	3	1	1	21	Jiangxi	R	3	2	10	2	1	3	1
1632103	2480	25	37	35	45	32	34	3	1	1	22	Henan	R	1	2	5	4	4	7	1
1632083	1720	30	36	31	43	51	34	12	1	1	20	Shanxi	R	2	2	2	3	2	3	1
1632106	2184	22	39	40	43	43	40	5	1	1	19	Xinjiang	R	2	2	20	3	2	5	1
1632181	1612	23	43	45	38	33	40	6	1	1	19	Shanxi	Ambidexterity	3	2	80	4	5	7	1
1632022	1300	22	31	41	54	34	39	8	1	1	19	Heilongjiang	R	3	2	20	6	4	8	1
1632188	932	17	40	42	35	37	38	10	1	2	19	Taiwan		1	2	15	6	5	6	1
1632026	1691	31	40	39	44	56	25	4	2	1	19	Fujian	R	2	2	12	2	1	4	1
1632003	2571	31	36	40	37	33	46	4	1	2	19	Beijing	R	2	2	20	6	4	6	1
1632067	2883	31	32	42	44	26	31	1	1	1	19	Guangdong	R	1	2	10	4	4	4	1
1632011	1538	34	47	40	26	31	45	6	1	1	19	Fujian	R	2	2	40	5	5	7	1
1632035	2169	29	39	32	39	46	29	4	1	2	22	Gansu	R	3	2	20	4	4	4	1
1632010	2261	35	42	36	38	42	34	6	1	1	19	Sichuan	R	3	2	30	5	4	7	1
1632156	1771	29	28	44	43	37	39	3	1	1	19	Ningxia	R	3	2	6	4	3	5	1
1632020	1781	34	47	39	52	32	40	11	1	2	19	Jiangsu	L	2	2	25	4	3	4	1
1632121	2805	25	39	40	39	43	38	4	1	1	19	Shanghai	R	3	2	100	5	4	7	1
1632034	2077	28	39	31	41	39	38	1	1	2	20	Jilin	R	3	2	18	4	4	6	1
1632044	2070	33	41	43	37	31	39	0	1	1	20	Chongqing	R	2	2	10	3	3	5	1
1632075	15503	28	37	39	42	32	43	7	1	2	20	Jiangsu	R	3	2	15	3	3	4	1
1632031	2052	30	35	35	33	31	32	6	1	1	20	Zhejiang	R	1	2	20	4	4	7	1
1632007	2463	33	41	41	50	36	39	10	1	1	19	Zhejiang	R	3	2	50	3	2	5	1
1632051	1752	31	41	40	34	53	25	5	2	2	21	Guangdong		2	2	10	4	4	5	2
1632074	2287	32	51	48	50	36	48	7	1	2	19	Anhui	R	2	1	5	2	2	5	1
1632012	2483	32	38	41	41	31	45	3	1	1	18	Neimenggu	R	3	2	20	4	5	6	1
1632157	2624	32	41	36	36	44	31	7	1	1	18	Chongqing	R	3	1	40	4	4	5	1
1632006	2057	30	44	40	41	46	37	3	1	1	19	Shanghai	R	3	2	50	4	5	6	1
1632060	2428	33	47	42	43	20	41	4	1	1	20	Guizhou	R	3	2	15	5	4	7	1
1632122	2060	31	42	40	42	47	36	11	1	1	18	Shanghai	R	3	2	12	4	4	5	1
1632005	1901	28	41	39	40	45	45	4	1	2	18	Anhui	R	2	2	4	2	2	4	1
1632071	1782	20	38	42	41	34	36	2	1	2	18	Shanxi	R	2	1	9	4	4	5	1
1632048	2315	35	37	39	45	39	29	3	1	1	19	Heilongjiang	R	3	2	8	4	3	5	1
1632191	1445	21	40	43	42	34	39	8	1	2	18	Tianjin	R	2	2	12	3	3	5	1
1632092	1915	28	49	38	57	37	35	6	1	1	19	Beijing	R	3	2	20	6	4	7	1
1632116	3634	23	43	38	46	48	39	2	1	1	21	Sichuan		3	2	20	4	4	5	1
1632001	2393	33	35	44	27	42	41	3	1	1	19	Henan	R	3	2	25	5	3	6	1
1632057	2245	25	49	49	39	32	29	8	1	1	19	Anhui	R	1	2	6	3	3	5	1
1632120	2421	27	38	43	48	34	37	5	1	1	21	Neimenggu	R	2	2	3	1	1	5	1
1632013	2541	34	45	37	36	36	37	5	1	1	20	Qinghai	R	3	2	15	4	3	5	1
1632082	1780	20	41	35	32	37	34	6	1	1	21	Shanxi	R	2	2	15	4	4	6	1
1632033	2402	28	37	41	42	30	39	6	1	1	21	Beijing	R	2	2	100	5	4	7	1
1632061	2471	26	42	37	45	35	32	2	1	1	19	Hebei	R	1	2	40	1	2	4	1
1632023	2064	24	37	41	34	46	35	2	1	1	18	Jiangxi	R	2	2	20	2	3	3	1
1632132	36527	35	42	39	43	30	37	4	1	1	21	Anhui	R	3	2	10	4	3	5	1
1632018	2787	34	44	43	35	32	33	6	2	1	18	Hubei	R	3	2	10	5	4	4	1
1632138	2435	31	39	43	43	40	33	11	1	1	20	Guangdong	R	2	2	7	4	4	5	1
1632042	2617	28	34	40	38	42	39	3	1	1	20	Anhui	R	2	2	5	2	2	4	1
1632185	2457	26	38	48	41	36	43	5	1	1	21	Guizhou	R	3	2	60	4	3	8	1
1632072	2481	34	47	36	47	41	47	7	2	2	19	Heilongjiang	R	3	2	12	4	3	5	1
1632069	1900	30	45	41	43	32	46	8	1	2	21	Zhejiang	R	3	1	40	4	4	5	1
1632095	2867	31	40	48	34	34	47	5	1	2	20	Beijing	R	3	2	80	4	4	5	1
1632137	2737	29	39	40	42	32	44	4	1	2	18	Sichuan	R	2	1	5	2	1	3	1
1632087	2000	32	53	50	31	24	50	6	1	1	20	Shanghai	R	3	2	10	4	3	5	1
1632118	2595	30	43	45	43	41	42	10	1	2	20	Shanxi	R	3	2	10	6	4	7	1
1632184	2443	35	41	35	44	50	25	7	1	1	19	Hubei	R	2	2	15	2	2	5	1
1632162	1263	14	41	43	43	32	34	3	1	1	20	Henan	R	2	2	0.8	2	2	3	1
1632117	1762	26	48	34	36	47	37	9	1	2	19	Shanxi	R	2	2	8	4	4	3	1
1632167	1411	23	43	45	51	33	42	9	1	2	19	Beijing	R	2	2	60	4	5	7	1
1632128	2452	30	41	35	37	44	34	3	1	1	21	Hebei	R	2	2	15	3	3	5	1
1632014	2312	32	42	50	35	27	41	9	1	2	21	Jilin	R	3	2	24	3	2	6	1
1632036	2313	28	41	35	41	37	34	2	1	1	18	Liaoning	R	3	2	2	4	4	7	1
1632190	2246	25	53	42	47	31	34	7	1	1	18	Guangdong	R	3	2	100	4	4	7	1
1632043	2434	27	37	41	36	27	32	2	1	1	20	Chongqing	R	3	2	10	4	4	5	1
1632064	1105	8	37	43	44	34	46	5	1	1	21	Hainan	R	3	2	5	4	3	5	1
1632004	2063	30	39	42	54	37	42	7	1	2	18	Taiwan	R	1	2	54	5	5	6	1
1632177	2084	35	36	39	38	42	22	2	1	1	21	Liaoning	R	3	2	10	4	3	7	1
1632008	2590	22	42	42	39	35	39	2	5	1	19	Yunnan		2	2	7	3	3	5	1
1632084	2398	27	42	43	45	35	37	7	1	1	19	Hubei	R	2	2	10	4	4	4	1
1632086	1808	31	40	41	40	38	46	5	1	2	21	Shanxi	R	2	2	8	3	1	3	1
1632062	1588	23	43	33	44	44	37	8	2	1	17	Shanxi	Ambidexterity	2	2	7	3	3	5	1
1632009	1658	31	40	28	40	54	17	7	1	2	19	Anhui	R	3	2	3	2	2	3	1
1632131	2575	26	42	47	45	27	44	3	1	1	21	Sichuan	R	3	2	12	4	4	7	1
1632164	1147	21	39	42	47	39	40	1	1	2	20	Shandong	R	2	1		4	4	5	1
1632073	2359	31	38	39	32	44	38	5	1	2	21	Sichuan	R	2	2	15	4	4	6	1
1632058	2613	25	37	40	39	34	35	6	1	1	21	Beijing	R	1	2	40	3	4	5	1
1632115	2509	25	46	35	38	35	36	4	1	2	20	Hebei	R	2	2	15	2	4	6	1
1632027	2388	29	40	35	45	43	44	7	1	1	20	Shandong	R	2	2	2	1	2	3	2
1632123	1984	25	37	44	41	36	32	4	5	1	21	Hubei	R	3	2	3	1	1	2	1
1632017	2355	35	42	47	52	24	39	6	1	1	21	Jiangsu	R	3	2	30	5	4	8	1
1632193	3581	31	51	35	38	30	37	8	1	1	21	Beijing	R	3	2	30	4	4	6	1
1632161	2713	28	37	43	38	36	40	2	1	2	20	Zhejiang	R	2	2	8	4	4	5	1
1632126	4352	29	43	48	41	30	39	8	1	2	18	Jiangxi	R	2	2	16	4	3	7	1
1632056	1921	25	48	51	52	34	44	11	1	2	19	Jilin	R	2	3	12	4	4	6	1
1632032	1831	31	42	47	44	31	38	6	1	1	21	Sichuan	R	2	2	50	4	3	7	1
1632068	1748	27	36	34	50	41	40	10	1	1	19	Henan	R	1	2	12	6	4	5	1
1632029	1660	25	42	33	37	46	34	6	1	1	20	Zhejiang	R	3	2	10	4	3	3	1
1632192	2352	25	41	46	40	36	42	5	1	2	18	Shanghai	R	2	2	19	4	4	6	1
1632025	1935	30	44	47	53	40	46	9	1	2	19	Shanxi	R	2	2	30	6	6	6	1
1632163	279	3	42	31	35	36	32	9	4	2	20	Liaoning	R	3	2	10	4	4	6	1
1632052	2199	27	43	40	24	34	33	2	1	2	19	Guangdong	R	2	2		4	4	3	1
1632165	2614	20	39	40	42	39	45	8	1	2	22	Malaysia	R	1	2	12	6	4	5	1
1632054	1446	32	38	36	37	44	35	1	1	1	20	Heilongjiang	R	2	2	20	4	4	5	1
1632055	1990	33	45	36	42	25	38	6	2	1	18	Zhejiang	R	2	2	15	2	2	7	1
1632168	2838	24	35	40	35	49	33	3	1	1	23	Malaysia	R	2	2		3	3	5	2
1632037	2350	34	44	34	39	40	32	3	1	2	19	Beijing	R	3	2	30	5	5	6	1
1632024	1824	29	35	34	45	39	44	3	1	2	21	Shanghai	R	3	1	25	4	4	6	1
1632015	1967	27	42	42	43	31	48	9	1	2	18	Beijing	R	2	2		4	6	8	1
1632173	1287	30	49	40	45	36	45	6	1	1	22	Hubei	R	1	3	20	4	4	8	1
1632166	2303	25	42	38	48	45	37	9	1	2	19	Hebei		2	2	12	3	3	6	1
1632169	2475	26	45	40	54	38	26	10	2	2	20	Hubei	L	3	2	30	4	2	5	1
1632107	2332	29	45	41	46	40	33	2	1	2	18	Beijing	R	3	2	36	5	4	7	1
1632171	2394	25	44	46	51	28	43	4	1	1	21	Shanghai	R	3	2	25	5	4	7	1
1632200	3350	34	42	46	35	33	40	2	1	1	20	Shandong	R	2	2	10	4	4	4	1
1632114	2636	23	35	39	41	37	40	4	1	1	23	Yunnan	R	2	2	50	3	4	6	1
1632135	2578	30	34	38	39	45	36	4	1	1	19	Beijing	R	2	2	10	4	4	6	1
1632019	2268	34	38	36	47	44	28	1	1	2	19	Fujian		2	2	10	2	2	5	1
1632053	21372	27	38	39	38	30	37	0	1	1	18	Shanghai	R	3	2	30	5	4	7	1
1632038	1753	19	40	41	32	42	31	10	1	2	18	Hainan	R	2	2	50	4	4	6	1
1632182	2269	31	37	42	41	28	41	1	2	2	20	Sichuan	R	2	2	30	3	2	5	1
1632104	2158	18	54	38	31	41	34	6	1	2	20	Chongqing	R	2	1	30	3	2	5	1
1632078	2574	29	36	42	40	26	26	2	1	1	20	Sichuan	R	1	2	10	4	2	3	1
1632170	1897	32	39	42	37	42	29	4	1	2	20	Zhejiang	R	2	2	35	4	4	5	1
1632099	2387	25	39	43	44	34	39	3	1	1	19	Henan	R	2	2	2	3	3	2	1
1632039	2418	32	47	38	39	36	35	10	1	1	20	Liaoning	R	3	2	8	4	3	5	1
1632050	4104	31	36	39	34	30	42	6	1	1	21	Liaoning	R	1	2	40	4	4	6	1
1632090	1601	29	42	39	44	43	41	8	1	1	18	Jiangsu	R	2	2	10~15	4	4	4	1
1632105	2409	32	44	40	45	34	39	5	1	1	20	Heilongjiang哈尔滨	R	3	2	20	3	4	4	1
1632085	2456	26	39	34	33	41	41	9	1	1	18	Anhui	R	3	2	40	4	5	9	1
1632046	2451	23	37	43	39	36	41	2	1	1	19	Hubei	R	2	2	8	4	6	5	1
1632130	2842	33	43	47	48	27	45	10	1	2	21	Fujian	R	3	2	10	4	4	4	1
1632175	1648	14	34	37	42	40	37	6	1	1	21	Beijing	R	1	2	60	5	3	6	1
1632030	1846	24	44	38	40	46	34	7	1	2	19	Beijing	R	3	2	50	5	5	6	1
1632124	2257	33	42	37	48	39	41	4	1	1	20	Guangxi	R	2	2	2-3	2	2	3	1
1632186	2157	33	49	45	41	44	41	7	2	2	20	Qinghai	R	2	2	10	4	4	6	1
1632088	2555	32	42	43	47	36	40	9	1	1	22	Beijing	R	1	2	50	4	4	9	1
1632070	2316	31	53	32	49	26	33	22	1	2	20	Jiangsu	R	1	2	18	4	4	3	1
1632045	1871	31	37	46	36	34	42	9	1	1	19	Tianjin	R	3	2	10	5	6	6	1
1632040	2447	33	45	35	37	44	31	7	1	1	19	Hunan	R	3	2	40	4	4	7	2
1632187	2416	26	40	43	41	40	35	7	1	1	19	Qinghai	L	3	2	15	6	5	7	1
1632081	1610	30	44	49	36	43	31	3	1	1	21	Fujian	R	2	2	12	2	2	5	1
1632079	2500	33	43	34	25	54	29	7	1	1	21	Hebei	R	1	2	30	4	5	5	2
1632089	2735	30	40	43	38	32	40	2	1	1	19	Henan	R	3	2	20	4	4	5	1
1632199	1822	25	39	35	37	46	35	5	1	1	19	Tianjin	R	3	2	10	5	4	7	1
1632066	2355	34	41	44	41	33	33	3	1	1	20	Hubei	R	2	2	2	2	1	3	1
1632139	2385	32	44	37	38	38	38	6	2	1	21	Hubei	R	3	2	4	3	3	3	1
1632189	2062	28	35	46	32	51	34	4	1	2	21	Fujian	R	1	2	60	4	4	4	1
1632016	7240	17	42	42	45	37	41	5	1	2	22	Tianjin	R	3	1	50	4	3	5	1
1632134	2954	32	41	51	44	26	48	10	1	2	19	Guangdong	R	3	2	20	4	5	7	1
1632145	1378	26	33	44	40	30	45	6	1	1	19	Jilin	R	3	2	30	5	5	9	1
1632093	2073	26	51	48	41	39	37	3	1	2	21	Shanxi	R	2	3	6	4	4	5	2
1632065	1720	35	43	38	38	47	34	5	1	1	19	Hunan	R	1	2	15	4	6	4	1
1632076	1864	26	44	48	39	40	46	2	1	2	18	Brasil	R	1	2		4	4	8	1
1632041	2478	26	37	42	37	44	38	7	1	2	20	Hunan	R	3	2	30	3	3	6	1
1632119	1638	26	42	47	39	36	44	10	1	2	22	Chongqing	R	2	2	10	3	3	7	1
1632002	3908	29	46	47	55	19	54	4	1	1	20	Liaoning	R	2	2	10	3	4	5	1
1632063	2106	30	45	46	39	45	43	9	1	2	19	Heilongjiang	R	2	2	30	5	5	5	1
1632098	2897	22	35	34	29	47	34	5	1	1	22	Shandong	R	3	2	15	5	3	3	1
1633939	1741	9	30	35	41	44	45	12	1	2	18	Shandong	R	2	1	15	5	4	6	1
1633874	1673	21	33	41	45	30	34	18	3	1	19	Shandong	L	2	2	0.6	2	4	5	1
1633836	1412	11	47	36	38	46	37	5	1	2	19	Shandong	R	2	1	5	3	3	4	1
1633897	2288	21	49	44	45	31	41	5	1	2	21	Heilongjiang	R	2	2	10	4	4	4	1
1633937	2447	24	35	46	42	36	36	0	1	1	21	Yunnan	R	3	2	1	1	2	2	1
1633818	2571	23	35	39	43	38	48	9	1	2	19	Shandong	R	2	1	3	1	2	3	1
1633801	2456	22	25	43	39	43	37	2	1	2	21	Hebei	R	2	2		3	3	7	1
1633805	2494	23	44	42	33	47	29	3	1	2	22	Jiangsu	R	2	2		3	2	4	1
1633944	1327	9	36	42	39	40	41	1	1	2	19	Yunnan	R	2	2	14	1	2	3	1
1633850	2605	23	42	36	46	44	39	7	1	2	19	Hebei	R	2	2	8	4	4	5	1
1633824	2790	22	49	42	38	30	36	3	1	1	24	Yunnan	R	2	2		2	1	4	1
1633919	2597	21	44	40	39	46	37	4	1	1	22	Guangxi	R	2	2	7	3	3	7	1
1633828	1677	22	47	45	26	39	42	4	1	1	20	Beijing	R	2	2	40	4	4	3	1
1633905	1651	21	38	44	44	38	47	9	1	1	21	Neimenggu	R	2	2	10	2	2	6	1
1633827	2349	25	42	40	40	37	35	8	1	2	21	Hunan	R	2	2	6	3	3	5	1
1633803	2346	27	36	45	46	39	42	4	2	2	22	Hebei	R	2	2	1.5	2	2	4	1
1633806	920	18	35	42	40	29	46	5	1	2	18	Tianjin	R	2	2	45	6	4	6	1
1633858	1986	18	36	47	45	27	48	15	1	2	21	Jiangsu	R	2	2	25	4	4	5	1
1633804	2868	28	42	39	41	39	35	10	1	2	19	Heilongjiang	R	2	2	4	3	3	4	1
1633846	1922	16	38	45	46	41	36	3	1	2	21	Yunnan	R	2	2	15	4	4	4	1
1633900	2176	21	42	36	42	34	37	4	2	2	22	Hunan	R	2	2	2	3	2	4	1
1633802	2786	25	32	40	58	39	37	5	1	2	20	Heilongjiang	R	2	2	12	3	3	7	2
1633842	2364	25	45	45	24	38	34	2	5	1	21	Tianjin	L	2	2	12	4	3	6	1
1633847	2351	21	44	35	42	19	43	5	1	1	22	Taiwan	R	1	2	50	4	3	6	1
1633849	1803	20	42	46	43	37	42	4	1	1	19	Guizhou	R	2	2	12	5	4	5	1
1633888	2485	28	44	30	39	37	37	2	1	1	21	Hunan	R	2	2	3	2	1	3	1
1633914	2074	22	32	44	42	28	29	11	1	1	21	Shandong	R	2	2	5	2	2	3	1
1633837	2318	22	36	38	45	46	40	6	1	1	23	Anhui	R	2	2	5	2	1	5	1
1633896	2253	25	44	41	41	34	41	5	1	1	21	Hubei	R	2	2	8	3	3	3	1
1633854	2899	28	41	41	54	39	36	8	1	2	20	Guangxi	R	2	2	8	4	4	5	1
1633906	2556	26	36	39	38	35	32	0	1	1	20	Anhui	R	2	2	6	3	1	3	1
1633934	2101	27	51	41	42	23	53	11	1	1	21	Tianjin	R	2	2	30	4	4	4	1
1633942	2641	27	39	38	40	41	29	2	1	2	18	Xinjiang	R	2	2	9	4	4	1	1
1633951	2980	29	45	34	44	45	24	5	1	1	18	Jilin	R	2	2	5	2	3	5	1
1633881	2304	32	33	45	40	29	37	2	1	1	21	Jiangxi	R	2	2	2	2	2	3	1
1633946	1908	27	42	31	45	29	39	10	1	1	22	Hubei	R	2	2	15	3	3	6	1
1633930	2070	24	47	33	41	45	38	9	1	2	19	Anhui	R	2	2	10	5	5	6	1
1633890	2807	23	37	42	48	21	44	2	1	1	21	Neimenggu	R	2	2	10	3	4	3	1
1633826	2867	22	44	39	30	52	25	5	1	1	20	Henan	R	2	1	6.3	3	3	3	1
1633913	1769	23	40	41	34	40	34	3	2	1	23	Jiangsu	R	2	2	6	2	1	3	1
1633898	1508	14	25	44	53	45	42	9	1	2	18	Gansu	R	2	2	12	4	4	5	1
1633880	2717	28	42	36	41	41	40	10	1	2	18	Jiangsu	R	2	2	15	4	4	6	1
1633925	1344	21	35	45	47	41	36	2	1	2	23	Zhejiang	R	2	2	20	2	2	6	1
1633884	1987	24	40	40	43	37	43	9	1	1	17	Hebei	R	2	2	5	2	2	6	1
1633832	1945	31	48	47	48	47	30	15	1	2	21	Hunan	R	2	2	30	4	4	7	2
1633903	1707	18	37	39	36	33	37	7	4	2	19	Shandong	R	2	1	20	2	2	5	1
1633923	4408	26	42	41	44	38	34	2	1	1	22	Henan	R	2	1	9	2	2	4	1
1633866	882	5	41	49	52	28	39	4	1	2	19	Yunnan	R	2	2	15	4	3	7	1
1633954	2538	24	42	37	50	38	41	11	1	1	20	Henan	R	2	2	8	4	4	5	1
1633844	1229	20	31	35	40	36	40	2	1	1	21	Shandong	R	2	2	6	3	3	2	1
1633811	2111	27	45	32	35	41	38	4	1	2	20	Liaoning	R	2	2	10	4	4	6	1
1633868	2683	25	40	45	53	23	40	8	1	2	21	Guangdong	R	2	2	20	4	5	6	1
1633856	1987	26	46	48	40	36	33	7	1	2	22	Beijing	R	2	2	3	3	3	4	1
1633845	2478	26	47	51	40	36	38	13	1	2	19	Anhui	L	2	2	8	4	4	6	1
1633928	2351	6	39	32	42	44	41	9	1	1	20	Yunnan	R	2	2	2.7	3	2	3	1
1633916	1718	25	40	49	47	24	50	2	1	2	21	Jilin	R	2	2	10	4	4	5	1
1633952	1781	26	39	35	37	33	31	5	1	2	19	Jilin	R	2	2	6	4	3	6	1
1633902	2619	22	40	41	43	30	38	3	1	2	21	Hebei	R	2	2	2	2	2	3	1
1633839	2469	29	35	48	37	38	43	9	1	2	19	Anhui	R	2	2	5	4	3	6	1
1633819	2171	17	36	34	42	32	38	12	1	1	20	Henan	R	2	2	6	2	2	3	1
1633852	1935	28	38	35	35	40	34	10	1	2	21	Shanxi	R	2	2	12	4	3	5	1
1633950	2430	29	43	38	41	32	44	4	1	1	20	Hebei	R	2	2	8	4	4	6	1
1633932	2259	25	43	45	41	31	39	4	1	2	22	Jiangsu	R	2	2	15	3	3	5	1
1633911	2360	24	40	42	36	37	38	6	1	1	20	Henan	R	2	2	12	3	3	5	1
1633875	2577	32	38	30	41	32	43	3	1	2	20	Zhejiang	R	2	2	20	3	3	7	1
1633953	2154	18	41	45	46	32	45	4	1	2	20	Shandong	R	2	1	4	2	2	4	1
1633894	2417	32	44	51	39	45	37	4	1	1	20	Anhui	R	2	2	*	2	1	6	1
1633899	2803	24	43	46	47	26	43	9	1	1	21	Yunnan	R	2	2	15	4	4	5	1
1633917	2476	28	34	40	36	39	29	11	1	2	22	Zhejiang	R	2	2	6	3	4	4	1
1633815	1617	31	41	39	28	39	32	6	1	2	20	Shandong	R	2	2	6	2	3	4	1
1633869	2069	32	41	38	40	41	41	15	1	1	22	Heilongjiang	R	2	2	25	4	4	5	1
1633935	1754	22	46	41	44	37	40	6	1	1	19	Hebei	R	2	2	10	3	2	4	1
1633821	1830	19	39	40	45	33	42	6	1	1	19	Hebei	R	2	2	5	3	3	5	1
1633909	2265	15	36	36	36	36	36	0	3	1	19	Sichuan	R	2	2	1	3	2	4	1
1633931	2332	28	45	38	38	35	41	6	1	2	19	Chongqing	R	2	2	7.2	3	2	6	1
1633838	2257	26	38	48	45	23	40	3	1	2	21	Yunnan	R	2	2	2	3	3	3	1
1633830	1499	22	34	40	47	40	34	9	1	2	19	Hunan	R	2	2	3	4	2	5	1
1633895	1563	24	40	43	50	42	39	5	1	1	20	Beijing	R	2	2	15	4	5	6	1
1633889	2421	28	40	36	32	36	40	5	1	1	21	Sichuan	R	2	2	10	3	3	3	1
1633904	2307	23	33	52	48	33	42	5	1	2	21	Shanxi	R	2	2	1.92	3	2	5	1
1633820	1712	17	42	44	41	22	43	9	1	1	22	Neimenggu	R	2	2	15	4	4	5	1
1633947	2036	25	40	34	40	45	38	2	1	2	19	Hebei	R	3	2	3	2	2	3	1
1633949	2622	19	33	32	42	37	40	10	3	1	20	Gansu	R	2	2	0.5	1	1	1	1
1633912	3402	26	36	49	55	20	46	5	1	2	21	Hebei	R	2	2	8	3	1	5	1
1633817	2166	25	32	41	41	43	42	2	1	2	20	Guangxi	R	2	2	3	4	4	4	1
1633955	1791	24	45	40	44	32	50	2	1	1	18	Chongqing	R	2	2	3	3	2	3	1
1633910	2397	30	41	36	43	43	33	5	1	2	21	Beijing	R	2	2	6	4	5	3	1
1633957	1782	27	43	48	42	29	46	3	2	1	22	Yunnan	L	2	2	3.6	3	4	5	1
1633871	2268	31	54	40	37	43	38	10	1	2	20	Xinjiang	R	2	2	7	5	4	6	1
1633941	2860	27	36	41	36	44	26	3	1	1	21	Henan	R	2	2	10	3	3	4	1
1633933	2594	26	38	38	45	41	38	4	1	2	21	Hebei	R	2	2	30	2	2	2	1
1633853	2149	27	44	49	38	35	44	6	5	1	22	Henan	R	2	2	6	4	3	6	1
1633829	2369	32	37	45	47	47	33	7	1	1	22	Beijing	R	2	2	20	4	4	6	1
1633870	2559	23	41	42	46	38	45	9	1	2	19	Shanxi	R	2	2	20	3	3	4	1
1633814	2256	17	41	41	36	47	31	3	1	2	22	Guizhou	R	2	2	36	3	2	3	2
1633822	2445	32	45	40	52	30	36	10	1	2	20	Hubei	R	2	2	15	3	3	6	1
1633922	2899	30	39	45	44	47	48	7	1	2	22	Heilongjiang	R	2	2	8	3	4	6	1
1633810	2200	32	38	45	32	25	34	5	1	2	18	Zhejiang	R	2	2	12	4	4	7	1
1633887	2515	21	41	50	53	23	50	6	1	2	18	Shandong	L	2	1	3	2	2	6	1
1633891	2583	25	43	50	50	40	44	6	1	2	21	Jilin	R	2	2	18	3	3	4	1
1633834	2556	27	39	41	38	35	30	1	1	1	19	Hebei	R	3	2	5	2	2	3	1
1633908	3160	25	34	31	45	42	38	4	1	2	21	Hebei	R	2	2	12	4	4	4	1
1633873	2325	20	44	36	43	52	32	4	1	1	20	Xinjiang	R	2	2	15	3	3	6	1
1633872	2545	30	47	40	28	45	36	6	1	2	19	Jilin省	R	2	2	13.8	4	4	5	1
1633816	2443	26	39	43	42	38	37	7	1	1	21	Shandong	R	2	2	5	2	2	3	1
1633840	2576	30	40	39	42	43	38	7	1	2	21	Hebei	R	2	2	3	3	2	3	1
1633812	2969	23	47	44	59	29	46	11	1	2	19	Shandong	R	2	1	6	3	3	6	1
1633831	2534	27	41	45	52	24	48	11	1	2	21	Shanxi	R	2	2	6	4	3	3	1
1633882	2321	30	43	40	45	27	38	5	1	2	20	Hubei	R	2	2	10	4	3	6	1
1633861	1683	22	35	38	40	42	37	10	1	1	21	Guizhou	R	2	2	10	4	3	4	1
1633809	1670	19	34	44	36	35	35	4	1	2	21	Beijing市	R	2	2	20	3	3	4	1
1633813	1759	22	33	35	37	42	33	2	1	2	21	Sichuan	R	2	2	1	2	2	3	1
1633825	2141	20	41	44	50	32	42	7	1	2	21	Gansu	R	2	2	15	4	3	6	1
1633862	2563	27	38	50	44	40	45	4	1	2	19	Shanxi	R	2	2	12	3	3	4	1
1633808	2601	26	36	42	42	34	39	5	1	2	20	Hunan	R	2	2	1.2	2	1	3	1
1633843	2255	23	35	44	36	48	30	2	1	2	22	Neimenggu	R	2	2	10	3	5	4	1
1633848	2307	20	35	45	47	34	45	3	1	2	21	Hebei	R	2	2	4	4	2	5	1
1633958	2720	25	41	46	48	26	44	9	1	2	19	Shandong	R	2	1	20	4	4	7	1
1633915	2182	32	35	43	42	36	48	0	1	2	21	Heilongjiang	R	2	2	15	4	4	5	1
1633867	2370	27	42	44	40	47	42	3	1	2	20	Chongqing	R	2	2	50	2	3	6	1
1633924	1276	16	32	46	44	26	45	9	1	2	20	Jiangsu	R	2	2	20	4	4	7	1
1633907	2136	22	33	40	37	47	35	2	1	1	22	Guizhou	R	2	2	2	1	1	3	1
1633857	2503	30	48	40	40	32	35	6	1	2	19	Shanxi	R	2	2	20	3	3	5	1
1633936	2385	27	40	41	43	36	37	6	1	2	22	Tianjin	R	2	2	20	4	3	7	1
1633956	4248	26	33	48	47	31	40	2	1	2	22	Heilongjiang	R	2	2	10	4	4	6	1
1633901	2538	31	44	48	42	36	35	5	5	2	21	Xinjiang	R	2	2		4	3	5	1
1633877	2197	24	49	42	32	42	43	6	1	1	22	Heilongjiang	R	2	2	6	4	4	3	1
1633959	2157	20	38	39	40	39	35	1	2	2	21	Guangxi	R	2	2	12	4	4	4	1
1633920	2577	31	37	36	35	48	28	4	1	2	21	Shandong	R	2	2	14	4	5	4	1
1633851	2109	20	36	42	40	37	42	12	1	2	21	Chongqing	R	2	1	100	4	4	7	1
1633864	2382	34	42	35	45	39	39	6	1	1	20	Gansu	R	2	2	18	3	3	6	1
1633929	2295	22	53	39	44	31	46	7	1	2	20	Hunan	R	2	1	15	2	3	5	1
1633885	2188	32	33	47	39	34	39	0	1	2	21	Hebei	R	2	2	7	1	2	3	1
1633960	962	9	36	40	34	36	34	8	1	1	21	Gansu	R	2	2	5	3	1	2	1
1633918	2111	19	32	46	32	28	39	5	1	2	19	Sichuan	R	2	2	10	3	4	3	1
1633940	2307	29	33	40	43	36	44	3	1	2	21	Henan	R	2	2	4	3	2	5	1
1633893	1951	24	41	40	47	33	42	5	1	2	20	Tianjin	R	2	2	50	3	2	7	1
1633948	1423	18	34	33	39	40	40	6	1	1	21	Liaoning	R	2	2	10	4	4	5	1
1633938	1681	27	42	36	43	39	40	4	1	2	20	Zhejiang	R	2	2	100	2	4	8	1
1633892	2219	24	42	44	46	32	44	9	1	2	20	Jiangsu	R	2	2	20	2	2	5	1
1633921	2376	24	41	40	38	34	44	5	1	2	21	Tianjin	R	2	2	13	2	2	5	1
1633859	2639	28	40	36	29	45	37	4	1	2	18	Shanxi	R	2	2	70	5	4	8	1
1633833	2379	23	40	45	44	32	42	3	1	2	22	Xinjiang	R	2	2	15	4	4	5	1
1633835	1134	7	37	36	41	44	43	6	1	1	18	Jiangxi	R	2	2	25	4	3	6	1
1633883	1873	17	43	47	51	31	47	14	1	1	19	Zhejiang	R	2	1	20	3	3	7	1
1633945	2531	20	40	40	51	34	45	5	1	1	22	Sichuan	R	2	2	5	2	1	4	1
1633927	2199	29	40	37	37	46	34	2	1	2	21	Sichuan	R	2	2	6	3	3	3	1
1633879	1422	28	42	43	45	37	42	6	1	1	21	Sichuan	R	2	2	20	2	3	6	1
1633855	1371	22	48	36	35	45	36	8	1	2	19	Hainan	R	2	2	10	4	4	6	1
1633886	1856	29	36	44	36	32	38	2	1	2	21	Gansu	R	2	2	2.4	4	2	5	1
1633863	719	26	33	35	44	42	42	10	1	1	20	Jiangsu	R	2	2	15	2	2	6	1
1633865	413	33	44	36	46	22	53	13	1	1	20	Tianjin	R	2	2	500	5	5	7	1
1633841	1575	8	29	39	40	37	36	7	3	1	19	Gansu	R	2	2	1	1	1	1	1
1633926	2859	28	44	43	59	23	52	12	1	1	20	Hunan	R	2	2	80	4	4	7	1
1633860	1239	14	32	34	37	34	32	21	3	1	20	Jilin	R	2	2		4	4	5	1
1633876	2776	24	37	39	46	43	41	12	1	2	23	Guangxi	R	2	2	30	4	3	5	1

## Sheet: final data
ID	intelligence	crea_behavor	openness	agreeableness	Conscientiousness	neuroticism	extraversion	gender_1m2f	age	original_news	flexibility_news	fluency_news	original_bott	flexibility_bott	fluency_bott	RATsum	rs10251794	rs1042778	rs1079597	rs12601685	rs16921695	rs17070145	rs1799913	rs1800497	rs2576037	rs35855737	rs362584	rs42352	rs4680	rs5993883	rs6265	rs644148	rs6832769	rs912765	DRD4	DIV_FLU	DIV_FLE	DIV_ORI	DIV	zRATsum	Zintelligence	Zage	Zcrea_behavor	rs10251794_m	rs1042778_m	rs1079597_m	rs12601685_m	rs16921695_m	rs17070145_m
1632080	28	6	38	40	47	35	43	0	23	2	3	5	6	5	9	12	TA'	GG'	CC'	CC'	TT'	TT'	GG'	GG'	CT'	TT'	GG'	TA'	GG'	GT'	CT'	GT'	AA'	CT'	44	-1.90882	-1.85431	-1.17952	-4.94265	0.949611	0.339788	2.30042	0.0316263	1	0	1	0	0	0
1632102	28	13	44	42	53	36	48	1	19	12	5	16	12	7	16	12	AA'	GG'	CC'	CC'	TT'	CT'	TT'	GG'	TT'	TT'	GG'	TT'	GG'	GG'	CT'	GT'	AA'	CC'	44	3.01983	1.45074	3.80231	8.27288	0.949611	0.339788	-0.817866	2.07407	1	0	1	0	0	1
1632021	32	7	39	43	38	31	44	0	20	6	3	11	13	9	18	13	TA'	GG'	CC'	CC'	TT'	TT'	TT'	GG'	TT'	TT'	GA'	TA'	GA'	GG'	CT'	GG'	AA'	CC'	44	2.1397	0.782962	2.17077	5.09344	1.33871	1.05566	-0.0382947	0.323405	1	0	1	0	0	0
1632179	29	21	44	49	48	34	40	1	19	8	4	12	6	6	10	10	TT'	GG'	CC'	CC'	GT'	TT'	GG'	GG'	TT'	TT'	GA'	TA'	GA'	TT'	TT'	GG'	GA'	CT'	24	0.320815	-0.201789	0.747147	0.866173	0.17142	0.518756	-0.817866	4.4083	0	0	1	0	1	0
1632176	16	4	27	45	40	36	41	0	20	0	4	4	1	5	7	9	TA'	GG'	CT'	CC'	TT'	TT'	GG'	GA'	CT'	TT'	GG'	TA'	GA'	GT'	CT'	GT'	GA'	CC'	24	-2.71482	-0.861108	-3.29734	-6.87327	-0.217676	-1.80782	-0.0382947	-0.55193	1	0	0	0	0	0
1632133	32	8	53	43	43	28	27	1	19	8	6	14	8	5	11	10	TA'	GG'	CC'	CC'	TT'	CT'	TT'	GG'	CT'	TT'	GG'	TA'	GA'	TT'	CT'	GG'	GG'	CT'	22	1.14535	1.1253	1.33739	3.60804	0.17142	1.05566	-0.817866	0.615183	1	0	1	0	0	1
1632127	34	5	45	44	38	46	31	1	20	5	3	8	7	8	10	13	TT'	GG'	CC'	CC'	TT'	CT'	GG'	GG'	CC'	TT'	GG'	TT'	GG'	GT'	CT'	GG'	GA'	CT'	24	-0.80327	0.123644	0.0789367	-0.60069	1.33871	1.41359	-0.0382947	-0.260152	0	0	1	0	0	1
1632101	29	7	41	42	49	43	45	1	20	3	5	9	3	6	8	10	AA'	GG'	CT'	CC'	GT'	TT'	TT'	GA'	CT'	TT'	GG'	TA'	GA'	TT'	TT'	GG'	GA'	CT'	44	-1.04723	0.791417	-1.74377	-1.99958	0.17142	0.518756	-0.0382947	0.323405	1	0	0	0	1	0
1632180	29	2	39	47	47	27	44	0	20	2	2	7	5	6	8	9	TT'	GG'	CT'	CC'	TT'	CT'	GG'	GA'	CT'	TT'	GA'	TA'	GG'	TT'	TT'	GG'	GA'	CT'	44	-1.60927	-2.1882	-1.47464	-5.27211	-0.217676	0.518756	-0.0382947	-1.13549	0	0	0	0	0	1
1632159	32	6	42	38	46	37	40	0	18	8	5	14	13	9	17	12	TT'	TG'	TT'	CC'	TT'	CC'	GT'	AA'	TT'	TT'	GG'	TT'	GA'	GT'	CT'	GG'	GA'	CT'	24	2.72028	2.76937	2.81299	8.30265	0.949611	1.05566	-1.59744	0.0316263	0	1	0	0	0	1
1632059	28	3	41	35	43	40	30	0	21	4	3	8	4	4	6	11	TA'	TG'	CT'	CC'	TT'	TT'	GT'	GA'	TT'	TT'	GG'	TA'	GG'	TT'	CT'	GT'	GA'	CC'	44	-1.85323	-2.51363	-1.12754	-5.49439	0.560515	0.339788	0.741276	-0.843709	1	1	0	0	0	0
1632103	25	3	37	35	45	32	34	0	22	6	5	10	4	9	11	12	TT'	TG'	CT'	CC'	TT'	TT'	TT'	GA'	CT'	TT'	GA'	TT'	GG'	GG'	TT'	GG'	GA'	CC'	44	0.0212612	2.76937	-0.485316	2.30532	0.949611	-0.197115	1.52085	-0.843709	0	1	0	0	0	0
1632083	30	12	36	31	43	51	34	0	20	9	4	15	11	7	16	9	TT'	GG'	CT'	CC'	TT'	CT'	GT'	GA'	CT'	TT'	GG'	AA'	GG'	GT'	TT'	GG'	GA'	TT'	44	2.73881	0.45753	2.54386	5.7402	-0.217676	0.697724	-0.0382947	1.7823	0	0	0	0	0	1
1632106	22	5	39	40	43	43	40	0	19	4	5	7	3	3	6	4	TT'	GG'	CT'	CG'	GT'	TT'	GT'	GA'	CT'	TT'	GG'	AA'	GG'	TT'	CT'	GG'	GA'	CC'	24	-2.13425	-1.18654	-1.42266	-4.74344	-2.16315	-0.734018	-0.817866	-0.260152	0	0	0	1	1	0
1632181	23	6	43	45	38	33	40	0	19	7	4	13	18	9	20	10	TT'	TG'	CT'	CC'	TT'	TT'	GT'	GA'	CT'	TT'	GG'	TA'	GA'	GT'	CT'	GG'	GA'	CT'	44	3.22672	1.77617	3.96749	8.97038	0.17142	-0.55505	-0.817866	0.0316263	0	1	0	0	0	0
1632022	22	8	31	41	54	34	39	0	19	6	3	8	7	6	10	14	TT'	GG'	TT'	CC'	TT'	CT'	GG'	AA'	TT'	TT'	GG'	TA'	GG'	TT'	CC'	GG'	AA'	CC'	44	-0.80327	-1.19499	0.400047	-1.59822	1.7278	-0.734018	-0.817866	0.615183	0	0	0	0	0	1
1632188	17	10	40	42	35	37	38	1	19	5	4	6	5	6	8	4	TT'	GG'	CT'	CC'	GT'	CT'	GT'	GA'	CT'	TT'	GG'	TA'	GA'	TT'	TT'	GG'	GA'	CT'	44	-1.89029	-0.201789	-0.511305	-2.60338	-2.16315	-1.62886	-0.817866	1.19874	0	0	0	0	1	1
1632003	31	4	36	40	37	33	46	1	19	7	4	13	4	8	10	10	TA'	GG'	CC'	CC'	TT'	TT'	GG'	GG'	CT'	TT'	GA'	TT'	GA'	GT'	CT'	GG'	AA'	CT'	24	0.601836	1.11685	-0.164206	1.55448	0.17142	0.876692	-0.817866	-0.55193	1	0	1	0	0	0
1632067	31	1	32	42	44	26	31	0	19	2	4	7	3	5	6	12	TA'	GG'	CT'	CC'	GT'	CT'	TT'	GA'	CT'	TT'	GA'	TT'	GG'	GG'	CT'	GG'	GA'	CC'	44	-2.13425	-0.861108	-2.06488	-5.06023	0.949611	0.876692	-0.817866	-1.42727	1	0	0	0	1	1
1632011	34	6	47	40	26	31	45	0	19	13	5	17	9	10	15	12	TT'	GG'	CT'	CG'	TT'	TT'	GG'	GA'	TT'	TT'	GA'	TA'	GG'	GT'	TT'	GG'	AA'	CT'	44	3.03837	3.42869	3.23806	9.70512	0.949611	1.41359	-0.817866	0.0316263	0	0	0	1	0	0
1632035	29	4	39	32	39	46	29	1	22	4	3	9	8	6	11	12	TT'	TG'	CC'	CC'	TT'	CT'	GG'	GG'	CT'	TT'	GG'	TA'	GG'	GT'	CT'	GG'	AA'	CT'	44	-0.25976	-1.19499	0.0529473	-1.40181	0.949611	0.518756	1.52085	-0.55193	0	1	1	0	0	1
1632010	35	6	42	36	38	42	34	0	19	9	4	12	9	6	13	11	TT'	GG'	TT'	CC'	TT'	CT'	TT'	GA'	CT'	TT'	AA'	TT'	GG'	TT'	CT'	GG'	GA'	CC'	44	1.10828	-0.201789	1.95362	2.86011	0.560515	1.59256	-0.817866	0.0316263	0	0	0	0	0	1
1632156	29	3	28	44	43	37	39	0	19	2	3	6	4	5	6	11	TT'	GG'	CT'	CC'	TT'	CT'	TT'	GA'	TT'	TT'	GA'	TA'	GG'	GT'	CT'	GG'	GA'	CT'	44	-2.41527	-1.85431	-1.76976	-6.03934	0.560515	0.518756	-0.817866	-0.843709	0	0	0	0	0	1
1632020	34	11	47	39	52	32	40	1	19	7	6	14	13	10	20	13	TA'	GG'	CT'	CC'	TT'	TT'	GT'	GA'	CC'	TT'	GG'	TA'	AA'	TT'	CT'	GG'	AA'	CC'	22	3.50775	4.4219	2.49188	10.4215	1.33871	1.41359	-0.817866	1.49052	1	0	0	0	0	0
1632121	25	4	39	40	39	43	38	0	19	2	4	6	3	7	9	11	TT'	GG'	CT'	CC'	TT'	TT'	TT'	GA'	TT'	TT'	GA'	TA'	GG'	GT'	CT'	GT'	AA'	CC'	44	-1.6278	0.45753	-2.06488	-3.23515	0.560515	-0.197115	-0.817866	-0.55193	0	0	0	0	0	0
1632034	28	1	39	31	41	39	38	1	20	3	3	10	3	7	10	13	TT'	GG'	CT'	CC'	TT'	TT'	GT'	GA'	CC'	TT'	GA'	TA'	GA'	GT'	CC'	GT'	GG'	TT'	44	-0.241228	-0.535675	-1.74377	-2.52067	1.33871	0.339788	-0.0382947	-1.42727	0	0	0	0	0	0
1632044	33	0	41	43	37	31	39	0	20	1	4	8	3	6	9	14	TT'	TG'	TT'	CC'	TT'	CC'	TT'	AA'	TT'	TT'	GA'	AA'	GA'	GG'	CT'	GG'	GA'	CC'	24	-1.06576	-0.201789	-2.38599	-3.65354	1.7278	1.23463	-0.0382947	-1.71904	0	1	0	0	0	1
1632075	28	7	37	39	42	32	43	1	20	8	4	11	14	1	14	10	TA'	GG'	CT'	CG'	TT'	TT'	GT'	GA'	TT'	TT'	GA'	TA'	GG'	TT'	CT'	GG'	AA'	CC'	44	1.08975	-3.49838	3.10811	0.69948	0.17142	0.339788	-0.0382947	0.323405	1	0	0	1	0	0
1632031	30	6	35	35	33	31	32	0	20	8	5	11	3	8	10	8	TT'	GG'	CC'	CC'	GT'	TT'	GT'	GG'	CT'	TT'	GG'	AA'	GG'	GG'	CT'	GG'	GA'	CC'	46	0.0397937	2.11005	-0.138216	2.01163	-0.606771	0.697724	-0.0382947	0.0316263	0	0	1	0	1	0
1632007	33	10	41	41	50	36	39	0	19	11	5	19	9	7	16	12	TA'	GG'	CT'	CC'	TT'	CT'	GG'	GA'	CT'	TT'	GA'	AA'	GA'	GT'	CC'	GG'	AA'	CT'	24	3.8629	1.45074	2.59584	7.90947	0.949611	1.23463	-0.817866	1.19874	1	0	0	0	0	1
1632074	32	7	51	48	50	36	48	1	19	14	3	17	11	4	13	10	TT'	GG'	CT'	CC'	GT'	TT'	GG'	GA'	TT'	TT'	GA'	TA'	AA'	TT'	CC'	GG'	AA'	CC'	24	2.51339	-2.51363	4.14941	4.14917	0.17142	1.05566	-0.817866	0.323405	0	0	0	0	1	0
1632012	32	3	38	41	41	31	45	0	18	7	6	11	8	6	11	8	TA'	TG'	CT'	CC'	TT'	CT'	GG'	GA'	TT'	TT'	GG'	AA'	GG'	GG'	CT'	GG'	AA'	CT'	44	0.302283	1.78462	1.01628	3.10318	-0.606771	1.05566	-1.59744	-0.843709	1	1	0	0	0	1
1632157	32	7	41	36	36	44	31	0	18	13	6	22	9	7	12	8	TT'	GG'	CC'	CG'	TT'	CC'	GG'	GG'	CT'	TT'	GG'	TT'	GG'	GT'	CT'	GG'	AA'	CC'	44	3.65601	2.44394	3.23806	9.33801	-0.606771	1.05566	-1.59744	0.323405	0	0	1	1	0	1
1632006	30	3	44	40	41	46	37	0	19	7	5	14	8	7	14	11	TA'	GG'	CT'	CG'	TT'	CT'	GT'	GA'	CT'	TT'	GG'	TA'	GA'	GT'	CT'	GG'	AA'	CT'	44	1.93281	1.45074	1.01628	4.39983	0.560515	0.697724	-0.817866	-0.843709	1	0	0	1	0	1
1632060	33	4	47	42	43	20	41	0	20	7	6	13	9	8	11	8	TA'	TG'	CT'	CC'	GT'	CT'	GT'	GA'	TT'	TT'	GG'	TT'	GG'	TT'	TT'	GG'	GG'	CT'	22	0.864325	3.10326	1.3114	5.27898	-0.606771	1.23463	-0.0382947	-0.55193	1	1	0	0	1	1
1632122	31	11	42	40	42	47	36	0	18	4	5	10	8	7	12	8	TT'	GG'	CT'	CC'	TT'	CT'	GG'	GA'	CT'	TT'	GA'	TA'	GA'	TT'	CC'	GG'	GA'	TT'	24	0.28375	1.45074	0.0529473	1.78743	-0.606771	0.876692	-1.59744	1.49052	0	0	0	0	0	1
1632005	28	4	41	39	40	45	45	1	18	4	5	10	4	5	9	11	TT'	GG'	CT'	CC'	GT'	TT'	GG'	GA'	CC'	TT'	GG'	TA'	GA'	GG'	TT'	GG'	GA'	TT'	44	-0.503717	0.132098	-1.12754	-1.49915	0.560515	0.339788	-1.59744	-0.55193	0	0	0	0	1	0
1632071	20	2	38	42	41	34	36	1	18	7	5	10	11	6	13	13	TT'	GG'	CT'	CC'	TT'	CT'	TT'	GA'	CC'	TT'	GG'	AA'	GG'	GG'	CT'	GG'	AA'	TT'	45	0.546239	0.791417	1.90164	3.2393	1.33871	-1.09195	-1.59744	-1.13549	0	0	0	0	0	1
1632048	35	3	37	39	45	39	29	0	19	3	3	6	7	7	8	13	AA'	GG'	TT'	CG'	TT'	CT'	GT'	AA'	CT'	TT'	GA'	TA'	GG'	GG'	CT'	GT'	AA'	CT'	44	-1.89029	-0.535675	-0.563284	-2.98925	1.33871	1.59256	-0.817866	-0.843709	1	0	0	1	0	1
1632191	21	8	40	43	42	34	39	1	18	3	4	9	6	8	11	11	TT'	GG'	CC'	CC'	TT'	TT'	GG'	GG'	CT'	TT'	GG'	AA'	GG'	GG'	TT'	GG'	GA'	CT'	24	-0.25976	1.11685	-0.858405	-0.00131573	0.560515	-0.912986	-1.59744	0.615183	0	0	1	0	0	0
1632092	28	6	49	38	57	37	35	0	19	10	4	16	15	9	21	6	TT'	GG'	CC'	CC'	TT'	TT'	GT'	GG'	CT'	TT'	GG'	TA'	GG'	GG'	CT'	GG'	AA'	CC'	24	4.33228	1.77617	4.04546	10.1539	-1.38496	0.339788	-0.817866	0.0316263	0	0	1	0	0	0
1632116	23	2	43	38	46	48	39	0	21	1	5	9	5	6	9	9	TT'	GG'	CT'	CC'	TT'	CT'	GT'	GA'	TT'	TT'	GG'	AA'	GG'	GT'	CC'	GT'	GA'	CT'	24	-0.784738	0.791417	-1.79575	-1.78907	-0.217676	-0.55505	0.741276	-1.13549	0	0	0	0	0	1
1632001	33	3	35	44	27	42	41	0	19	6	5	10	10	6	11	10	TA'	GG'	CT'	CC'	GT'	TT'	GG'	GG'	CC'	TT'	GA'	TA'	GA'	GG'	CT'	GG'	AA'	CT'	24	0.0212612	0.791417	1.28541	2.09809	0.17142	1.23463	-0.817866	-0.843709	1	0	0	0	1	0
1632057	25	8	49	49	39	32	29	0	19	4	3	6	4	5	10	7	TA'	GG'	CT'	CC'	TT'	CT'	GG'	GA'	CT'	TT'	GG'	TT'	GG'	GT'	TT'	GG'	AA'	CT'	24	-1.36531	-1.85431	-1.12754	-4.34716	-0.995867	-0.197115	-0.817866	0.615183	1	0	0	0	0	1
1632120	27	5	38	43	48	34	37	0	21	4	5	8	5	7	12	7	AA'	GG'	CC'	CC'	TT'	TT'	GT'	GG'	TT'	TT'	GG'	TT'	GG'	TT'	CC'	GG'	GG'	CC'	44	-0.278293	1.45074	-0.832415	0.340028	-0.995867	0.160821	0.741276	-0.260152	1	0	1	0	0	0
1632013	34	5	45	37	36	36	37	0	20	5	3	10	8	6	13	11	TT'	GG'	CT'	CC'	GT'	TT'	TT'	GA'	CT'	TT'	GG'	TT'	GG'	GG'	CT'	GT'	GG'	CC'	44	0.546239	-1.19499	0.374058	-0.274698	0.560515	1.41359	-0.0382947	-0.260152	0	0	0	0	1	0
1632082	20	6	41	35	32	37	34	0	21	2	3	6	3	5	8	11	TT'	GG'	TT'	CC'	GG'	TT'	TT'	AA'	CC'	TT'	GA'	TA'	GA'	GT'	CC'	GG'	GA'	CC'	44	-1.89029	-1.85431	-2.06488	-5.80948	0.560515	-1.09195	0.741276	0.0316263	0	0	0	0	1	0
1632033	28	6	37	41	42	30	39	0	21	4	4	9	5	5	8	11	TT'	GG'	CT'	CC'	TT'	CT'	GT'	GA'	CT'	TT'	GG'	TA'	GG'	TT'	CT'	GG'	AA'	CT'	44	-1.04723	-0.861108	-0.832415	-2.74075	0.560515	0.339788	0.741276	0.0316263	0	0	0	0	0	1
1632061	26	2	42	37	45	35	32	0	19	10	4	14	8	6	12	11	TA'	GG'	TT'	CG'	TT'	TT'	TT'	AA'	CT'	TT'	GA'	AA'	GG'	GT'	CT'	GT'	AA'	CT'	45	1.40784	-0.201789	1.97961	3.18566	0.560515	-0.0181471	-0.817866	-1.13549	1	0	0	1	0	0
1632023	24	2	37	41	34	46	35	0	18	1	3	7	5	7	7	11	TA'	TG'	CT'	CC'	TT'	TT'	GG'	GA'	CC'	TT'	GA'	TT'	GG'	GG'	TT'	GG'	GA'	CC'	44	-1.87176	-0.535675	-1.79575	-4.20318	0.560515	-0.376083	-1.59744	-1.13549	1	1	0	0	0	0
1632132	35	4	42	39	43	30	37	0	21	6	4	10	5	5	9	11	TT'	GG'	CC'	CC'	GT'	CT'	GT'	GG'	CT'	TT'	GA'	AA'	GG'	GT'	TT'	GT'	GA'	CC'	44	-0.503717	-0.861108	-0.190195	-1.55502	0.560515	1.59256	0.741276	-0.55193	0	0	1	0	1	1
1632138	31	11	39	43	43	40	33	0	20	2	3	5	5	6	9	13	TT'	TG'	CT'	CC'	GT'	TT'	GT'	GA'	CT'	TT'	GG'	AA'	GG'	GG'	CT'	GT'	AA'	TT'	24	-1.90882	-1.19499	-1.47464	-4.57845	1.33871	0.876692	-0.0382947	1.49052	0	1	0	0	1	0
1632042	28	3	34	40	38	42	39	0	20	9	4	14	14	3	16	8	TT'	GG'	CT'	CC'	TT'	TT'	TT'	GA'	CT'	TT'	GG'	TA'	GG'	TT'	CC'	GT'	AA'	CT'	44	2.45779	-2.17975	3.42922	3.70727	-0.606771	0.339788	-0.0382947	-0.843709	0	0	0	0	0	0
1632185	26	5	38	48	41	36	43	0	21	3	4	9	6	7	11	11	TA'	TG'	CC'	CC'	TT'	CT'	GT'	GG'	CC'	TT'	GA'	TA'	GA'	TT'	CT'	GG'	AA'	CT'	46	-0.25976	0.45753	-0.858405	-0.660635	0.560515	-0.0181471	0.741276	-0.260152	1	1	1	0	0	1
1632069	30	8	45	41	43	32	46	1	21	11	5	16	8	7	11	11	TT'	GG'	CC'	CC'	GT'	TT'	GG'	GG'	CT'	TT'	GG'	TT'	GA'	GT'	CC'	GT'	AA'	CT'	44	1.70739	1.45074	2.30072	5.45884	0.560515	0.697724	0.741276	0.615183	0	0	1	0	1	0
1632095	31	5	40	48	34	34	47	1	20	5	6	9	4	7	9	13	TA'	GG'	CT'	CC'	TT'	TT'	GT'	GA'	CC'	TT'	GA'	AA'	AA'	TT'	CT'	GT'	AA'	CT'	47	-0.784738	2.44394	-0.806426	0.852778	1.33871	0.876692	-0.0382947	-0.260152	1	0	0	0	0	0
1632137	29	4	39	40	42	32	44	1	18	5	5	12	6	7	13	10	TT'	GG'	CC'	CG'	TT'	CT'	GT'	GG'	CC'	TT'	GG'	TA'	GG'	GT'	CT'	GT'	GA'	CT'	44	1.10828	1.45074	-0.216184	2.34283	0.17142	0.518756	-1.59744	-0.55193	0	0	1	1	0	1
1632087	32	6	53	50	31	24	50	0	20	5	4	11	10	7	13	9	TT'	GG'	CT'	CC'	TT'	TT'	GG'	GA'	TT'	TT'	GA'	AA'	GA'	GT'	CC'	GG'	GA'	CT'	24	0.82726	0.45753	0.964299	2.24909	-0.217676	1.05566	-0.0382947	0.0316263	0	0	0	0	0	0
1632118	30	10	43	45	43	41	42	1	20	7	4	13	8	7	14	12	TT'	TG'	CC'	CG'	GT'	CT'	GT'	GG'	TT'	TT'	GG'	TA'	GA'	GT'	CT'	GG'	AA'	CT'	24	1.65179	0.45753	1.01628	3.1256	0.949611	0.697724	-0.0382947	1.19874	0	1	1	1	1	1
1632184	35	7	41	35	44	50	25	0	19	9	6	15	13	8	18	10	TT'	GG'	CT'	CC'	TT'	CT'	GT'	GA'	TT'	TT'	GA'	TT'	GG'	GG'	CT'	GT'	AA'	CC'	48	3.26379	3.10326	3.1341	9.50115	0.17142	1.59256	-0.817866	0.323405	0	0	0	0	0	1
1632162	14	3	41	43	43	32	34	0	20	7	4	10	7	7	12	12	TT'	TG'	CC'	CC'	TT'	TT'	TT'	GG'	CT'	TT'	GG'	TA'	GG'	GG'	CT'	GT'	GA'	CC'	44	0.28375	0.45753	0.721157	1.46244	0.949611	-2.16576	-0.0382947	-0.843709	0	1	1	0	0	0
1632117	26	9	48	34	36	47	37	1	19	2	5	9	9	8	18	13	TA'	GG'	CT'	CC'	GT'	TT'	GG'	GA'	TT'	TT'	GA'	TA'	GA'	GT'	CC'	GG'	GA'	CT'	24	1.57766	2.11005	-0.294152	3.39356	1.33871	-0.0181471	-0.817866	0.906961	1	0	0	0	1	0
1632167	23	9	43	45	51	33	42	1	19	4	5	9	8	7	13	8	TT'	GG'	CC'	CC'	GG'	CT'	GG'	GG'	CC'	TT'	GG'	TT'	GA'	TT'	TT'	GG'	GA'	CT'	44	0.265218	1.45074	0.0529473	1.7689	-0.606771	-0.55505	-0.817866	0.906961	0	0	1	0	1	1
1632128	30	3	41	35	37	44	34	0	21	13	5	16	7	5	10	12	TT'	GG'	CC'	CC'	GT'	TT'	TT'	GG'	TT'	TT'	GA'	TA'	GA'	GT'	CT'	GG'	GA'	CT'	44	1.4449	0.132098	2.64782	4.22482	0.949611	0.697724	0.741276	-0.843709	0	0	1	0	1	0
1632014	32	9	42	50	35	27	41	1	21	2	4	6	4	6	7	11	TT'	GG'	CT'	CG'	GT'	CT'	TT'	GA'	CC'	TT'	GA'	AA'	GG'	GG'	TT'	GG'	AA'	CT'	44	-2.15278	-0.201789	-1.76976	-4.12433	0.560515	1.05566	0.741276	0.906961	0	0	0	1	1	1
1632036	28	2	41	35	41	37	34	0	18	9	4	15	5	5	8	14	TA'	GG'	TT'	CG'	GT'	TT'	GT'	GA'	CT'	TT'	GA'	TT'	GA'	GT'	TT'	GG'	GA'	CC'	44	0.638901	-0.861108	0.773136	0.55093	1.7278	0.339788	-1.59744	-1.13549	1	0	0	1	1	0
1632190	25	7	53	42	47	31	34	0	18	6	6	10	7	7	10	8	TT'	GG'	CC'	CC'	GT'	TT'	GT'	GG'	TT'	TT'	GA'	TA'	GG'	TT'	TT'	GG'	AA'	CC'	44	-0.241228	2.44394	0.400047	2.60276	-0.606771	-0.197115	-1.59744	0.323405	0	0	1	0	1	0
1632043	27	2	37	41	36	27	32	0	20	0	2	4	3	4	4	12	TT'	GG'	CT'	CC'	GT'	CT'	GT'	GA'	CT'	TT'	GA'	AA'	GA'	GT'	CT'	GG'	GA'	TT'	24	-3.50229	-3.50684	-2.7071	-9.71623	0.949611	0.160821	-0.0382947	-1.13549	0	0	0	0	1	1
1632064	8	5	37	43	44	34	46	0	21	7	4	11	6	5	13	10	TA'	GG'	CC'	CC'	TT'	TT'	GG'	GG'	CT'	TT'	GG'	TT'	GG'	GT'	CC'	GT'	GA'	CC'	44	0.82726	-0.861108	0.426036	0.392189	0.17142	-3.23957	0.741276	-0.260152	1	0	1	0	0	0
1632004	30	7	39	42	54	37	42	1	18	5	4	11	13	7	17	8	TT'	GG'	CC'	CC'	GT'	TT'	GG'	GG'	CT'	TT'	GA'	AA'	AA'	TT'	CT'	GG'	AA'	CT'	46	1.87722	0.45753	1.84966	4.18441	-0.606771	0.697724	-1.59744	0.323405	0	0	1	0	1	0
1632177	35	2	36	39	38	42	22	0	21	5	3	7	6	7	11	11	TT'	GG'	CC'	CC'	TT'	TT'	TT'	GG'	TT'	TT'	GA'	AA'	GA'	GT'	CT'	GT'	AA'	CT'	44	-0.821803	-0.535675	-0.216184	-1.57366	0.560515	1.59256	0.741276	-1.13549	0	0	1	0	0	0
1632084	27	7	42	43	45	35	37	0	19	7	6	11	8	8	12	12	TA'	GG'	CT'	CC'	TT'	CT'	GT'	GA'	CC'	TT'	GG'	AA'	GA'	GT'	CC'	GG'	AA'	CC'	44	0.564771	3.10326	1.01628	4.68431	0.949611	0.160821	-0.817866	0.323405	1	0	0	0	0	1
1632086	31	5	40	41	40	38	46	1	21	3	4	10	3	6	10	11	TT'	GG'	CT'	CC'	TT'	CT'	GT'	GA'	CT'	TT'	GA'	AA'	GG'	GT'	CT'	GG'	GG'	TT'	44	-0.241228	-0.201789	-1.74377	-2.18678	0.560515	0.876692	0.741276	-0.260152	0	0	0	0	0	1
1632009	31	7	40	28	40	54	17	1	19	14	5	19	8	8	13	13	TA'	TG'	CT'	CC'	TT'	TT'	GG'	GA'	CT'	TT'	GA'	AA'	GG'	GG'	TT'	GG'	AA'	CC'	44	3.07543	2.11005	3.26405	8.44954	1.33871	0.876692	-0.817866	0.323405	1	1	0	0	0	0
1632131	26	3	42	47	45	27	44	0	21	3	4	9	2	6	7	8	TT'	GG'	TT'	CC'	GT'	TT'	GT'	AA'	TT'	TT'	GG'	TA'	GA'	TT'	CC'	GT'	GA'	CT'	44	-1.30972	-0.201789	-2.03889	-3.55039	-0.606771	-0.0181471	0.741276	-0.843709	0	0	0	0	1	0
1632164	21	1	39	42	47	39	40	1	20	6	6	13	14	8	18	8	TA'	GG'	CT'	CC'	GT'	TT'	TT'	GA'	CC'	TT'	GA'	TA'	GG'	GG'	CT'	GG'	GG'	CT'	44	2.70175	3.10326	2.46589	8.2709	-0.606771	-0.912986	-0.0382947	-1.42727	1	0	0	0	1	0
1632073	31	5	38	39	32	44	38	1	21	3	5	9	6	6	12	12	TA'	GG'	TT'	CC'	GT'	TT'	GG'	AA'	TT'	TT'	GA'	AA'	GG'	GT'	CC'	GG'	AA'	CC'	24	0.00272872	0.791417	-0.858405	-0.064259	0.949611	0.876692	0.741276	-0.260152	1	0	0	0	1	0
1632058	25	6	37	40	39	34	35	0	21	3	5	9	12	5	15	8	TA'	GG'	CT'	CG'	GT'	TT'	GT'	GA'	CT'	TT'	GG'	TT'	GG'	GT'	CT'	GT'	GA'	CC'	44	0.790195	0.132098	0.912321	1.83461	-0.606771	-0.197115	0.741276	0.0316263	1	0	0	1	1	0
1632115	25	4	46	35	38	35	36	1	20	13	4	18	14	7	18	10	TT'	GG'	TT'	CC'	GT'	TT'	GT'	GA'	CT'	TT'	GG'	AA'	GG'	GG'	CT'	GG'	AA'	CC'	44	4.10685	0.45753	4.71367	9.27805	0.17142	-0.197115	-0.0382947	-0.55193	0	0	0	0	1	0
1632027	29	7	40	35	45	43	44	0	20	5	5	10	11	5	14	10	TA'	GG'	TT'	CC'	TT'	TT'	GT'	AA'	CT'	TT'	GG'	TA'	GG'	TT'	TT'	GT'	AA'	CC'	44	0.808728	0.132098	1.25942	2.20025	0.17142	0.518756	-0.0382947	0.323405	1	0	0	0	0	0
1632017	35	6	42	47	52	24	39	0	21	4	3	5	3	3	6	9	TA'	GG'	CT'	CC'	TT'	TT'	GG'	GA'	CC'	TT'	GG'	TA'	GA'	GT'	CT'	GT'	GA'	CC'	44	-2.69629	-3.17295	-1.42266	-7.2919	-0.217676	1.59256	0.741276	0.0316263	1	0	0	0	0	0
1632193	31	8	51	35	38	30	37	0	21	8	5	12	9	7	14	7	TT'	GG'	TT'	CC'	GT'	CC'	GT'	AA'	TT'	TT'	GA'	AA'	GA'	TT'	CT'	GG'	GA'	CT'	44	1.37077	1.45074	1.63251	4.45402	-0.995867	0.876692	0.741276	0.615183	0	0	0	0	1	1
1632161	28	2	37	43	38	36	40	1	20	3	4	7	2	6	7	10	TA'	GG'	CC'	CC'	GT'	TT'	GT'	GG'	CT'	TT'	GA'	AA'	GG'	GT'	CT'	GG'	AA'	CT'	44	-1.87176	-0.201789	-2.03889	-4.11244	0.17142	0.339788	-0.0382947	-1.13549	1	0	1	0	1	0
1632126	29	8	43	48	41	30	39	1	18	5	4	10	8	5	11	8	TT'	GG'	CT'	CC'	GT'	TT'	GG'	GA'	CT'	TT'	GG'	TT'	AA'	GT'	CC'	GG'	GA'	CT'	44	0.0212612	-0.861108	0.374058	-0.465789	-0.606771	0.518756	-1.59744	0.615183	0	0	0	0	1	0
1632056	25	11	48	51	52	34	44	1	19	3	5	8	6	6	10	9	TA'	GG'	CT'	CC'	TT'	TT'	GT'	GA'	CT'	TT'	GG'	TA'	GA'	GG'	CC'	GT'	GG'	CT'	24	-0.80327	0.791417	-0.858405	-0.870258	-0.217676	-0.197115	-0.817866	1.49052	1	0	0	0	0	0
1632032	31	6	42	47	44	31	38	0	21	6	3	12	6	6	10	11	TT'	GG'	CC'	CG'	TT'	TT'	GT'	GG'	CT'	TT'	GG'	AA'	GG'	GT'	CT'	GG'	AA'	CC'	24	0.320815	-1.19499	0.104926	-0.769253	0.560515	0.876692	0.741276	0.0316263	0	0	1	1	0	0
1632068	27	10	36	34	50	41	40	0	19	15	6	20	19	9	24	9	AA'	GG'	CC'	CC'	GT'	CT'	GT'	GG'	TT'	TT'	AA'	TA'	GA'	TT'	CT'	GG'	AA'	CC'	44	6.24383	3.76258	6.83149	16.8379	-0.217676	0.160821	-0.817866	1.19874	1	0	1	0	1	1
1632029	25	6	42	33	37	46	34	0	20	9	4	11	7	7	11	10	TT'	GG'	TT'	CC'	TT'	TT'	GG'	AA'	TT'	TT'	GG'	AA'	AA'	GT'	CT'	GG'	AA'	TT'	22	0.302283	0.45753	1.36338	2.12319	0.17142	-0.197115	-0.0382947	0.0316263	0	0	0	0	0	0
1632192	25	5	41	46	40	36	42	1	18	4	5	13	6	8	13	9	TT'	GG'	TT'	CC'	GT'	TT'	GG'	AA'	TT'	TT'	GG'	TA'	GA'	GT'	CC'	GG'	AA'	CC'	24	1.3893	2.11005	-0.537295	2.96206	-0.217676	-0.197115	-1.59744	-0.260152	0	0	0	0	1	0
1632025	30	9	44	47	53	40	46	1	19	8	4	13	10	7	14	11	TT'	GG'	CC'	CC'	GT'	TT'	GG'	GG'	CT'	TT'	GG'	AA'	GG'	TT'	CC'	GT'	AA'	CT'	34	1.65179	0.45753	1.92763	4.03695	0.560515	0.697724	-0.817866	0.906961	0	0	1	0	1	0
1632052	27	2	43	40	24	34	33	1	19	4	4	9	7	4	11	14	TT'	GG'	CT'	CC'	TT'	TT'	GT'	GA'	CC'	TT'	GG'	TA'	GG'	GT'	CT'	GG'	AA'	CT'	24	-0.25976	-1.52043	-0.242174	-2.02236	1.7278	0.160821	-0.817866	-1.13549	0	0	0	0	0	0
1632165	20	8	39	40	42	39	45	1	22	6	3	14	6	6	11	5	TT'	GG'	CC'	CC'	TT'	CT'	GT'	GG'	CC'	TT'	GG'	TT'	GG'	GT'	CT'	GG'	AA'	CT'	44	1.14535	-1.19499	0.104926	0.0552783	-1.77406	-1.09195	1.52085	0.615183	0	0	1	0	0	1
1632054	32	1	38	36	37	44	35	0	20	7	3	10	9	8	13	12	TT'	GG'	CC'	CC'	GG'	TT'	TT'	GG'	CT'	TT'	GG'	AA'	GA'	GG'	TT'	GT'	GG'	CT'	34	0.546239	0.123644	1.3114	1.98128	0.949611	1.05566	-0.0382947	-1.42727	0	0	1	0	1	0
1632168	24	3	35	40	35	49	33	0	23	2	4	8	9	8	12	8	TT'	TG'	TT'	CC'	TT'	TT'	TT'	AA'	CT'	TT'	GG'	TT'	GG'	TT'	CC'	GG'	GA'	CT'	24	-0.278293	1.11685	-0.294152	0.544404	-0.606771	-0.376083	2.30042	-0.843709	0	1	0	0	0	0
1632037	34	3	44	34	39	40	32	1	19	3	4	8	6	7	12	12	TT'	GG'	CC'	CC'	GT'	TT'	GT'	GG'	TT'	TT'	AA'	TT'	GG'	GT'	TT'	GG'	GA'	CC'	44	-0.278293	0.45753	-0.858405	-0.679167	0.949611	1.41359	-0.817866	-0.843709	0	0	1	0	1	0
1632024	29	3	35	34	45	39	44	1	21	4	4	11	9	9	14	13	TA'	GG'	CT'	CG'	TT'	TT'	TT'	GA'	CT'	TT'	GA'	TA'	GG'	GG'	CT'	GG'	GG'	CC'	24	1.08975	1.77617	0.348068	3.21399	1.33871	0.518756	0.741276	-0.843709	1	0	0	1	0	0
1632015	27	9	42	42	43	31	48	1	18	13	5	16	14	6	17	8	TT'	GG'	CT'	CC'	TT'	TT'	GG'	GA'	CT'	TT'	GG'	AA'	GG'	GT'	CC'	GG'	AA'	TT'	44	3.28232	0.791417	4.71367	8.7874	-0.606771	0.160821	-1.59744	0.906961	0	0	0	0	0	0
1632173	30	6	49	40	45	36	45	0	22	12	5	18	10	8	15	3	TT'	TG'	CC'	CC'	TT'	TT'	GG'	GG'	CT'	TT'	GG'	TT'	GA'	TT'	CT'	GG'	GG'	CC'	24	3.31939	2.11005	3.21207	8.64151	-2.55225	0.697724	1.52085	0.0316263	0	1	1	0	0	0
1632166	25	9	42	38	48	45	37	1	19	7	4	14	14	6	16	11	TT'	GG'	CT'	CG'	GT'	CT'	GT'	GA'	TT'	TT'	GA'	TA'	GA'	TT'	CC'	GG'	GA'	CT'	24	2.45779	-0.201789	2.787	5.04301	0.560515	-0.197115	-0.817866	0.906961	0	0	0	1	1	1
1632107	29	2	45	41	46	40	33	1	18	8	5	13	13	6	18	11	TA'	GG'	TT'	CC'	TT'	TT'	GG'	AA'	TT'	TT'	GA'	AA'	GA'	GT'	TT'	GG'	AA'	TT'	44	2.70175	0.791417	2.81299	6.30616	0.560515	0.518756	-1.59744	-1.13549	1	0	0	0	0	0
1632171	25	4	44	46	51	28	43	0	21	6	5	10	3	5	7	13	TT'	GG'	CT'	CC'	TT'	CT'	GT'	GA'	CC'	TT'	GA'	TA'	GA'	GT'	CT'	GG'	AA'	CT'	45	-1.02869	0.132098	-0.780437	-1.67703	1.33871	-0.197115	0.741276	-0.55193	0	0	0	0	0	1
1632200	34	2	42	46	35	33	40	0	20	2	4	6	7	9	10	14	TT'	TG'	CT'	CC'	TT'	TT'	TT'	GA'	CT'	TT'	GA'	AA'	GG'	GT'	CC'	GG'	AA'	CC'	24	-1.36531	1.77617	-0.884394	-0.473539	1.7278	1.41359	-0.0382947	-1.13549	0	1	0	0	0	0
1632114	23	4	35	39	41	37	40	0	23	6	4	11	4	6	8	10	TA'	GG'	CT'	CC'	TT'	TT'	GT'	GA'	TT'	TT'	GG'	AA'	GG'	GT'	CT'	GG'	GA'	CC'	24	-0.485184	-0.201789	-0.485316	-1.17229	0.17142	-0.55505	2.30042	-0.55193	1	0	0	0	0	0
1632135	30	4	34	38	39	45	36	0	19	3	4	9	9	7	13	6	TA'	TG'	CC'	CG'	TT'	CC'	GT'	GG'	CC'	TT'	GA'	TT'	GG'	TT'	TT'	GG'	AA'	CC'	24	0.265218	0.45753	0.0269579	0.749706	-1.38496	0.697724	-0.817866	-0.55193	1	1	1	1	0	1
1632019	34	1	38	36	47	44	28	1	19	4	3	6	4	5	8	10	TA'	GG'	CT'	CC'	TT'	TT'	GG'	GA'	CT'	TT'	GG'	TA'	GG'	TT'	CC'	GG'	GA'	CC'	24	-1.89029	-1.85431	-1.12754	-4.87214	0.17142	1.41359	-0.817866	-1.42727	1	0	0	0	0	0
1632053	27	0	38	39	38	30	37	0	#NULL!	7	4	10	6	3	7	12	TA'	GG'	TT'	CC'	GT'	TT'	GT'	AA'	CC'	TT'	GG'	AA'	GG'	GT'	CC'	GG'	GG'	CC'	22	-1.02869	-2.17975	0.426036	-2.7824	0.949611	0.160821	#NULL!	-1.71904	1	0	0	0	1	0
1632055	35	9	48	37	43	25	37	0	18	12	6	17	18	8	23	9	TA'	GG'	CC'	CC'	TT'	TT'	GG'	GG'	CT'	TT'	GA'	TA'	GA'	GT'	TT'	GT'	GA'	CT'	44	5.13828	3.10326	5.57304	13.8146	-0.217676	1.59256	-1.59744	0.906961	1	0	1	0	0	0
1632038	19	10	40	41	32	42	31	1	18	4	5	12	9	7	13	12	TT'	GG'	CT'	CC'	GT'	TT'	GT'	GA'	TT'	TT'	GG'	TT'	GA'	TT'	TT'	GG'	GA'	CC'	44	1.10828	1.45074	0.348068	2.90709	0.949611	-1.27092	-1.59744	1.19874	0	0	0	0	1	0
1632104	18	6	54	38	31	41	34	1	20	9	5	13	8	8	13	10	TA'	GG'	CT'	CC'	GT'	CT'	GG'	GA'	CT'	TT'	GG'	AA'	GA'	GT'	TT'	GT'	GG'	CC'	46	1.3893	2.11005	1.6585	5.15786	0.17142	-1.44989	-0.0382947	0.0316263	1	0	0	0	1	1
1632078	29	2	36	42	40	26	26	0	20	7	6	11	9	6	15	6	AA'	GG'	CC'	CC'	TT'	CT'	GT'	GG'	CT'	TT'	GG'	AA'	GG'	TT'	TT'	GT'	GA'	CT'	44	1.35224	1.78462	1.3114	4.44826	-1.38496	0.518756	-0.0382947	-1.13549	1	0	1	0	0	1
1632170	32	4	39	42	37	42	29	1	20	2	4	9	9	8	13	7	TA'	GG'	TT'	CC'	TT'	TT'	TT'	AA'	TT'	TT'	GG'	TA'	GG'	GG'	CT'	GG'	GA'	CC'	24	0.265218	1.11685	-0.294152	1.08791	-0.995867	1.05566	-0.0382947	-0.55193	1	0	0	0	0	0
1632099	25	3	39	43	44	34	39	0	19	2	5	6	6	5	8	11	TA'	TT'	TT'	CC'	TT'	CT'	GT'	AA'	CT'	TT'	GG'	AA'	GA'	GT'	CT'	GG'	AA'	CT'	44	-1.89029	0.132098	-1.17952	-2.93771	0.560515	-0.197115	-0.817866	-0.843709	1	1	0	0	0	1
1632039	32	10	47	38	39	36	35	0	20	3	3	8	6	8	11	13	TA'	GG'	CT'	CC'	TT'	CT'	TT'	GA'	CT'	TT'	GG'	AA'	GG'	TT'	CC'	GG'	GA'	CC'	44	-0.540781	0.123644	-0.858405	-1.27554	1.33871	1.05566	-0.0382947	1.19874	1	0	0	0	0	1
1632050	31	6	36	39	34	30	42	0	21	2	4	6	5	6	9	7	TT'	GG'	CC'	CC'	GT'	CC'	TT'	GG'	CT'	TT'	GG'	TA'	GG'	GT'	CC'	GG'	GA'	CC'	44	-1.6278	-0.201789	-1.47464	-3.30423	-0.995867	0.876692	0.741276	0.0316263	0	0	1	0	1	1
1632090	29	8	42	39	44	43	41	0	18	5	5	12	3	7	10	13	TT'	GG'	CT'	CG'	TT'	TT'	GG'	GA'	CC'	TT'	GG'	TA'	GG'	TT'	CC'	GG'	GA'	CC'	44	0.320815	1.45074	-1.10155	0.670004	1.33871	0.518756	-1.59744	0.615183	0	0	0	1	0	0
1632105	32	5	44	40	45	34	39	0	20	6	3	9	12	7	14	12	TT'	GG'	CT'	CC'	GT'	CT'	GT'	GA'	TT'	TT'	GA'	TT'	GG'	GT'	CC'	GT'	GG'	CT'	44	0.527706	-0.535675	1.87565	1.86768	0.949611	1.05566	-0.0382947	-0.260152	0	0	0	0	1	1
1632085	26	9	39	34	33	41	41	0	18	2	5	7	4	6	8	10	TT'	TG'	CT'	CG'	GT'	CT'	GG'	GA'	CC'	TT'	GG'	AA'	GG'	GT'	CT'	GT'	AA'	CC'	24	-1.60927	0.791417	-1.76976	-2.58761	0.17142	-0.0181471	-1.59744	0.906961	0	1	0	1	1	1
1632046	23	2	37	43	39	36	41	0	19	4	4	13	4	6	10	13	TT'	GG'	CT'	CC'	TT'	TT'	GT'	GA'	CT'	TT'	GG'	AA'	AA'	GT'	CT'	GG'	AA'	CC'	44	0.601836	-0.201789	-1.12754	-0.727489	1.33871	-0.55505	-0.817866	-1.13549	0	0	0	0	0	0
1632130	33	10	43	47	48	27	45	1	21	14	3	20	13	8	17	11	TA'	GG'	TT'	CG'	TT'	CT'	GT'	GA'	TT'	TT'	GA'	AA'	GG'	TT'	CT'	GT'	AA'	CC'	24	4.40641	0.123644	4.73965	9.26971	0.560515	1.23463	0.741276	1.19874	1	0	0	1	0	1
1632175	14	6	34	37	42	40	37	0	21	7	5	12	13	9	17	8	TT'	GG'	CC'	CG'	TT'	TT'	GG'	GG'	CT'	TT'	AA'	TT'	GG'	GT'	CC'	GG'	GA'	CT'	24	2.15824	2.76937	2.49188	7.41949	-0.606771	-2.16576	0.741276	0.0316263	0	0	1	1	0	0
1632030	24	7	44	38	40	46	34	1	19	9	5	17	13	9	21	13	TT'	GG'	CT'	CC'	GT'	TT'	GG'	GA'	TT'	TT'	GA'	AA'	GG'	GT'	CC'	GT'	GA'	CT'	45	4.6133	2.76937	3.1341	10.5168	1.33871	-0.376083	-0.817866	0.323405	0	0	0	0	1	0
1632124	33	4	42	37	48	39	41	0	20	10	5	15	7	6	13	11	TT'	GG'	TT'	CC'	GT'	TT'	GG'	AA'	TT'	TT'	GG'	TA'	GA'	GT'	CC'	GT'	AA'	CC'	34	1.95135	0.791417	1.68449	4.42725	0.560515	1.23463	-0.0382947	-0.55193	0	0	0	0	1	0
1632088	32	9	42	43	47	36	40	0	22	3	5	11	6	6	14	10	TA'	GG'	CC'	CC'	TT'	CC'	TT'	GG'	CT'	TT'	GA'	AA'	GG'	GT'	CC'	GT'	AA'	CC'	34	1.08975	0.791417	-0.858405	1.02276	0.17142	1.05566	1.52085	0.906961	1	0	1	0	0	1
1632070	31	22	53	32	49	26	33	1	20	7	5	13	8	8	13	15	TT'	GG'	CT'	CC'	TT'	TT'	GG'	GA'	TT'	TT'	GG'	TT'	GG'	GT'	CT'	GG'	GA'	TT'	24	1.3893	2.11005	1.01628	4.51564	2.1169	0.876692	-0.0382947	4.70008	0	0	0	0	0	0
1632045	31	9	37	46	36	34	42	0	19	1	4	9	5	7	12	13	TA'	TG'	CC'	CC'	TT'	TT'	GT'	GG'	CC'	TT'	GA'	TA'	GG'	TT'	CT'	GG'	GA'	CT'	24	0.00272872	0.45753	-1.79575	-1.33549	1.33871	0.876692	-0.817866	0.906961	1	1	1	0	0	0
1632040	33	7	45	35	37	44	31	0	19	7	5	11	12	9	17	10	TA'	TG'	CC'	GG'	GT'	TT'	GT'	GG'	TT'	TT'	GG'	AA'	GG'	GT'	CT'	GG'	AA'	CC'	44	1.87722	2.76937	2.19676	6.84335	0.17142	1.23463	-0.817866	0.323405	1	1	1	1	1	0
1632187	26	7	40	43	41	40	35	0	19	8	3	9	11	8	15	10	TA'	GG'	CC'	CG'	TT'	CT'	GG'	GG'	CT'	TT'	GG'	TT'	GG'	GT'	TT'	GG'	AA'	TT'	24	0.790195	0.123644	2.22275	3.13659	0.17142	-0.0181471	-0.817866	0.323405	1	0	1	1	0	1
1632081	30	3	44	49	36	43	31	0	21	5	3	9	6	8	12	13	TT'	GG'	CC'	CC'	TT'	TT'	GT'	GG'	CT'	TT'	GG'	AA'	GG'	GT'	TT'	GT'	GA'	CC'	24	0.00272872	0.123644	-0.216184	-0.089812	1.33871	0.697724	0.741276	-0.843709	0	0	1	0	0	0
1632079	33	7	43	34	25	54	29	0	21	8	4	11	9	6	15	3	TT'	TG'	CT'	CG'	TT'	TT'	GT'	GA'	TT'	TT'	GG'	AA'	GA'	GT'	TT'	GG'	AA'	CC'	34	1.35224	-0.201789	1.63251	2.78296	-2.55225	1.23463	0.741276	0.323405	0	1	0	1	0	0
1632089	30	2	40	43	38	32	40	0	19	3	4	7	4	7	7	12	TT'	GG'	TT'	CC'	TT'	TT'	GG'	AA'	CT'	TT'	GA'	TA'	GG'	TT'	CT'	GG'	AA'	CC'	44	-1.87176	0.45753	-1.44865	-2.86287	0.949611	0.697724	-0.817866	-1.13549	0	0	0	0	0	0
1632199	25	5	39	35	37	46	35	0	19	3	2	7	6	5	9	11	TA'	GG'	CT'	CG'	TT'	TT'	GG'	GA'	CT'	TT'	GA'	AA'	GG'	GT'	CT'	GG'	AA'	CC'	44	-1.34678	-2.84752	-0.858405	-5.0527	0.560515	-0.197115	-0.817866	-0.260152	1	0	0	1	0	0
1632066	34	3	41	44	41	33	33	0	20	8	6	12	8	8	14	12	TT'	GG'	CT'	CC'	TT'	TT'	GT'	GG'	CC'	TT'	GA'	TA'	AA'	TT'	CC'	GG'	AA'	CC'	44	1.37077	3.10326	1.33739	5.81142	0.949611	1.41359	-0.0382947	-0.843709	0	0	0	0	0	0
1632189	28	4	35	46	32	51	34	1	21	4	3	9	9	6	12	9	TA'	GG'	CT'	CC'	GT'	TT'	GT'	GA'	TT'	TT'	GA'	TA'	GG'	GG'	CT'	GG'	GA'	CT'	24	0.00272872	-1.19499	0.348068	-0.844197	-0.217676	0.339788	0.741276	-0.55193	1	0	0	0	1	0
1632016	17	5	42	42	45	37	41	1	22	3	3	5	5	5	6	8	TA'	GG'	CC'	CC'	TT'	TT'	GT'	GG'	CT'	TT'	GG'	TA'	GG'	TT'	CT'	GT'	GA'	CT'	24	-2.69629	-1.85431	-1.15353	-5.70413	-0.606771	-1.62886	1.52085	-0.260152	1	0	1	0	0	0
1632134	32	10	41	51	44	26	48	1	19	5	4	8	8	5	8	11	TT'	GG'	TT'	GG'	TT'	CT'	GG'	AA'	CT'	TT'	GA'	TT'	GA'	TT'	CC'	GG'	AA'	CT'	44	-1.32825	-0.861108	0.374058	-1.8153	0.560515	1.05566	-0.817866	1.19874	0	0	0	1	0	1
1632145	26	6	33	44	40	30	45	0	19	3	4	7	5	7	9	11	TA'	GG'	CT'	CG'	GT'	TT'	GT'	GA'	CT'	TT'	GG'	AA'	GG'	TT'	CC'	GG'	AA'	CC'	24	-1.34678	0.45753	-1.15353	-2.04278	0.560515	-0.0181471	-0.817866	0.0316263	1	0	0	1	1	0
1632093	26	3	51	48	41	39	37	1	21	0	2	3	4	4	5	11	TA'	GG'	CT'	CG'	GT'	CT'	TT'	GA'	CC'	TT'	GA'	TA'	GA'	GT'	TT'	GG'	AA'	CC'	24	-3.52082	-3.50684	-2.41198	-9.43964	0.560515	-0.0181471	0.741276	-0.843709	1	0	0	1	1	1
1632065	35	5	43	38	38	47	34	0	19	8	5	16	13	10	16	10	TT'	TG'	CT'	CG'	GT'	TT'	GT'	GA'	CC'	TT'	GG'	TA'	GG'	GT'	TT'	GG'	GG'	TT'	24	3.01983	3.42869	2.81299	9.26152	0.17142	1.59256	-0.817866	-0.260152	0	1	0	1	1	0
1632076	26	2	44	48	39	40	46	1	18	7	4	8	5	7	10	8	TT'	GG'	CC'	CC'	GT'	CT'	TT'	GG'	CT'	TT'	GA'	TA'	GG'	GT'	CT'	GT'	AA'	CT'	44	-0.80327	0.45753	0.130915	-0.214825	-0.606771	-0.0181471	-1.59744	-1.13549	0	0	1	0	1	1
1632041	26	7	37	42	37	44	38	1	20	5	2	7	5	5	9	12	TT'	GG'	CT'	CC'	TT'	TT'	TT'	GG'	CT'	TT'	GA'	TA'	GG'	GT'	TT'	GG'	AA'	CT'	44	-1.34678	-2.84752	-0.511305	-4.7056	0.949611	-0.0181471	-0.0382947	0.323405	0	0	0	0	0	0
1632119	26	10	42	47	39	36	44	1	22	2	3	6	7	7	9	14	TA'	GG'	CC'	CG'	TT'	TT'	GT'	GG'	CT'	TT'	GG'	TA'	GA'	GT'	CC'	GG'	GA'	CT'	22	-1.6278	-0.535675	-0.884394	-3.04787	1.7278	-0.0181471	1.52085	1.19874	1	0	1	1	0	0
1632002	29	4	46	47	55	19	54	0	20	3	3	8	5	5	9	13	TA'	GG'	CC'	CC'	TT'	TT'	GT'	GG'	CT'	TT'	GA'	AA'	GG'	GT'	CC'	GG'	GA'	CT'	44	-1.06576	-1.85431	-1.15353	-4.0736	1.33871	0.518756	-0.0382947	-0.55193	1	0	1	0	0	0
1632063	30	9	45	46	39	45	43	1	19	9	3	11	6	5	10	11	TA'	GG'	CC'	CC'	GT'	CT'	TT'	GG'	CT'	TT'	GA'	AA'	GG'	GT'	TT'	GG'	GG'	CT'	24	0.0397937	-1.85431	1.06826	-0.746263	0.560515	0.697724	-0.817866	0.906961	1	0	1	0	1	1
1632098	22	5	35	34	29	47	34	0	22	3	4	9	4	6	6	8	TT'	GG'	CC'	CG'	TT'	TT'	GG'	GG'	CT'	TT'	GG'	TT'	GA'	TT'	CT'	GG'	GA'	CT'	24	-1.5722	-0.201789	-1.44865	-3.22264	-0.606771	-0.734018	1.52085	-0.260152	0	0	1	1	0	0
1633939	9	12	30	35	41	44	45	1	18	3	4	9	8	8	14	7	TT'	TG'	CC'	CC'	TT'	TT'	GG'	GG'	CT'	TT'	GG'	TA'	GG'	GG'	CT'	GG'	GA'	TT'	34	0.527706	1.11685	-0.268163	1.37639	-0.995867	-3.0606	-1.59744	1.7823	0	1	1	0	0	0
1633836	11	5	47	36	38	46	37	1	19	1	4	6	6	6	9	11	TA'	GG'	TT'	CG'	TT'	TT'	GG'	AA'	CC'	TT'	GA'	TA'	GG'	GT'	CT'	GG'	AA'	CT'	44	-1.6278	-0.201789	-1.50063	-3.33022	0.560515	-2.70266	-0.817866	-0.260152	1	0	0	1	0	0
1633897	21	5	49	44	45	31	41	1	21	6	5	10	9	7	13	5	TT'	GG'	CT'	CC'	GG'	CT'	GT'	GG'	CT'	TT'	GG'	TA'	GA'	GT'	TT'	GT'	AA'	CT'	24	0.546239	1.45074	0.990289	2.98726	-1.77406	-0.912986	0.741276	-0.260152	0	0	0	0	1	1
1633937	24	0	35	46	42	36	36	0	21	3	5	8	3	5	6	7	TA'	GG'	CT'	CG'	TT'	TT'	GG'	GA'	CC'	TT'	GA'	TA'	GA'	TT'	CC'	GG'	GA'	CC'	44	-1.85323	0.132098	-1.74377	-3.4649	-0.995867	-0.376083	0.741276	-1.71904	1	0	0	1	0	0
1633818	23	9	35	39	43	38	48	1	19	0	4	7	3	5	9	5	TT'	GG'	CC'	CC'	TT'	TT'	GG'	GG'	CC'	TT'	GG'	AA'	GG'	GT'	CC'	GT'	AA'	CC'	44	-1.34678	-0.861108	-2.7071	-4.91499	-1.77406	-0.55505	-0.817866	0.906961	0	0	1	0	0	0
1633801	22	2	25	43	39	43	37	1	21	3	3	6	2	5	6	9	TA'	TG'	CC'	CC'	TT'	TT'	GG'	GG'	CC'	TT'	GG'	TA'	GG'	GT'	CC'	GT'	GA'	TT'	24	-2.41527	-1.85431	-2.03889	-6.30847	-0.217676	-0.734018	0.741276	-1.13549	1	1	1	0	0	0
1633805	23	3	44	42	33	47	29	1	22	3	4	7	3	6	9	9	TT'	GG'	CT'	CC'	TT'	TT'	GG'	GA'	CT'	TT'	GA'	AA'	GG'	GT'	CC'	GT'	AA'	CC'	44	-1.34678	-0.201789	-1.74377	-3.29234	-0.217676	-0.55505	1.52085	-0.843709	0	0	0	0	0	0
1633944	9	1	36	42	39	40	41	1	19	4	4	11	8	7	13	12	TT'	GG'	TT'	CC'	TT'	TT'	GT'	AA'	TT'	TT'	GA'	TA'	GA'	GT'	TT'	GG'	GA'	CT'	44	0.82726	0.45753	0.0529473	1.33774	0.949611	-3.0606	-0.817866	-1.42727	0	0	0	0	0	0
1633850	23	7	42	36	46	44	39	1	19	2	3	6	2	7	9	13	TT'	GG'	CC'	CC'	GT'	TT'	GT'	GG'	CT'	TT'	GG'	TT'	GG'	GT'	CT'	GG'	GA'	CT'	55	-1.6278	-0.535675	-2.36	-4.52348	1.33871	-0.55505	-0.817866	0.323405	0	0	1	0	1	0
1633824	22	3	49	42	38	30	36	0	24	9	6	14	8	7	12	9	TA'	GG'	CC'	CC'	GT'	CT'	GT'	GG'	CT'	TT'	GA'	TA'	GG'	GT'	CT'	GT'	GG'	CC'	24	1.40784	2.44394	1.6585	5.51028	-0.217676	-0.734018	3.07999	-0.843709	1	0	1	0	1	1
1633919	21	4	44	40	39	46	37	0	22	1	2	2	1	2	2	6	TT'	GG'	CT'	CC'	GT'	CC'	GG'	GA'	CT'	TT'	GG'	TA'	GG'	GT'	CC'	GG'	GA'	CC'	24	-4.58931	-4.82548	-2.97623	-12.391	-1.38496	-0.912986	1.52085	-0.55193	0	0	0	0	1	1
1633828	22	4	47	45	26	39	42	0	20	2	4	9	5	7	8	7	TA'	GG'	CT'	CG'	TT'	TT'	TT'	GA'	CC'	TT'	GG'	AA'	GA'	TT'	CC'	GT'	GA'	CC'	34	-1.04723	0.45753	-1.47464	-2.06433	-0.995867	-0.734018	-0.0382947	-0.55193	1	0	0	1	0	0
1633905	21	9	38	44	44	38	47	0	21	1	3	4	3	6	7	10	TT'	GG'	CC'	CG'	GT'	TT'	TT'	GG'	TT'	TT'	GA'	AA'	GG'	GG'	CT'	GG'	GA'	CT'	44	-2.71482	-1.19499	-2.38599	-6.2958	0.17142	-0.912986	0.741276	0.906961	0	0	1	1	1	0
1633827	25	8	42	40	40	37	35	1	21	3	5	9	3	6	10	8	TT'	GG'	CC'	CC'	TT'	CT'	GG'	GG'	TT'	TT'	GG'	TA'	GG'	GT'	TT'	GG'	AA'	CC'	24	-0.522249	0.791417	-1.74377	-1.4746	-0.606771	-0.197115	0.741276	0.615183	0	0	1	0	0	1
1633806	18	5	35	42	40	29	46	1	18	9	5	15	4	8	12	8	AA'	GG'	TT'	CC'	TT'	TT'	GT'	GA'	CC'	TT'	GA'	TT'	GA'	TT'	CT'	GT'	AA'	CT'	24	1.68886	2.11005	0.478015	4.27693	-0.606771	-1.44989	-1.59744	-0.260152	1	0	0	0	0	0
1633858	18	15	36	47	45	27	48	1	21	3	3	8	7	6	10	4	TT'	GG'	CC'	CC'	TT'	TT'	TT'	GG'	CT'	TT'	GG'	TA'	GG'	GG'	CT'	GG'	AA'	CT'	44	-0.80327	-1.19499	-0.563284	-2.56155	-2.16315	-1.44989	0.741276	2.65763	0	0	1	0	0	0
1633804	28	10	42	39	41	39	35	1	19	2	4	7	6	4	8	9	TT'	GG'	CT'	CC'	TT'	TT'	TT'	GA'	CC'	TT'	GA'	AA'	AA'	GT'	CT'	GG'	GA'	CT'	45	-1.60927	-1.52043	-1.17952	-4.30921	-0.217676	0.339788	-0.817866	1.19874	0	0	0	0	0	0
1633846	16	3	38	45	46	41	36	1	21	3	3	8	6	6	15	9	TA'	GG'	TT'	CC'	GG'	TT'	TT'	AA'	CT'	TT'	GA'	TT'	GA'	GT'	CC'	GG'	GA'	CC'	44	0.509174	-1.19499	-0.858405	-1.54423	-0.217676	-1.80782	0.741276	-0.843709	1	0	0	0	1	0
1633802	25	5	32	40	58	39	37	1	20	5	4	10	4	5	7	9	TT'	GG'	CC'	CC'	TT'	TT'	GT'	GG'	CT'	TT'	GG'	TA'	GG'	TT'	TT'	GG'	GA'	CC'	44	-1.02869	-0.861108	-0.806426	-2.69623	-0.217676	-0.197115	-0.0382947	-0.260152	0	0	1	0	0	0
1633847	21	5	44	35	42	19	43	0	22	7	2	13	19	6	21	8	TT'	GG'	TT'	CC'	TT'	TT'	GT'	GA'	CT'	TT'	GG'	TA'	GG'	GG'	CC'	GG'	AA'	CT'	44	3.48921	-2.1882	4.26261	5.56362	-0.606771	-0.912986	1.52085	-0.260152	0	0	0	0	0	0
1633849	20	4	42	46	43	37	42	0	19	3	4	9	5	5	9	11	TT'	TG'	TT'	CC'	TT'	TT'	TT'	AA'	CT'	TT'	GG'	TA'	GG'	GT'	CT'	GG'	AA'	CC'	44	-0.784738	-0.861108	-1.15353	-2.79937	0.560515	-1.09195	-0.817866	-0.55193	0	1	0	0	0	0
1633888	28	2	44	30	39	37	37	0	21	6	4	10	7	6	9	8	TT'	GG'	CC'	CC'	TT'	TT'	GT'	GG'	TT'	TT'	GG'	TA'	GA'	GT'	TT'	GG'	AA'	CC'	44	-0.503717	-0.201789	0.400047	-0.305458	-0.606771	0.339788	0.741276	-1.13549	0	0	1	0	0	0
1633914	22	11	32	44	42	28	29	0	21	3	5	9	5	7	9	9	TA'	GG'	CT'	CC'	TT'	CT'	TT'	GA'	CT'	TT'	GA'	TA'	GA'	GG'	CT'	GG'	AA'	CT'	44	-0.784738	1.45074	-1.15353	-0.487528	-0.217676	-0.734018	0.741276	1.49052	1	0	0	0	0	1
1633837	22	6	36	38	45	46	40	0	23	3	5	10	4	8	9	10	TT'	GG'	CC'	CC'	GT'	TT'	GT'	GG'	CT'	TT'	GG'	TT'	GG'	GT'	CT'	GG'	GA'	CC'	45	-0.503717	2.11005	-1.44865	0.157692	0.17142	-0.734018	2.30042	0.0316263	0	0	1	0	1	0
1633896	25	5	44	41	41	34	41	0	21	6	6	9	6	9	12	8	TT'	GG'	CT'	CG'	TT'	CT'	GG'	GG'	CT'	TT'	GG'	AA'	GG'	TT'	CT'	GG'	AA'	CC'	44	0.00272872	3.76258	0.104926	3.87023	-0.606771	-0.197115	0.741276	-0.260152	0	0	0	1	0	1
1633854	28	8	41	41	54	39	36	1	20	1	3	6	8	8	13	7	TA'	TG'	CT'	CG'	TT'	TT'	TT'	GA'	TT'	TT'	GG'	TA'	GG'	GG'	CT'	GG'	AA'	TT'	44	-0.577846	0.123644	-0.910384	-1.36459	-0.995867	0.339788	-0.0382947	0.615183	1	1	0	1	0	0
1633906	26	0	36	39	38	35	32	0	20	0	3	3	1	3	3	10	TT'	GG'	CT'	CC'	GT'	TT'	GT'	GA'	CT'	TT'	GG'	AA'	GA'	TT'	CC'	GG'	AA'	CT'	44	-4.0458	-3.17295	-3.29734	-10.5161	0.17142	-0.0181471	-0.0382947	-1.71904	0	0	0	0	1	0
1633934	27	11	51	41	42	23	53	0	21	10	6	15	9	8	18	5	TA'	GG'	CT'	CC'	TT'	TT'	GT'	GA'	CT'	TT'	GA'	TA'	GG'	GG'	CT'	GT'	GA'	CT'	22	3.26379	3.10326	2.27473	8.64178	-1.77406	0.160821	0.741276	1.49052	1	0	0	0	0	0
1633942	27	2	39	38	40	41	29	1	18	6	3	10	6	7	10	11	TT'	GG'	TT'	CC'	TT'	TT'	TT'	AA'	CT'	TT'	GG'	AA'	GG'	TT'	TT'	GT'	GA'	CT'	24	-0.241228	-0.535675	0.104926	-0.671977	0.560515	0.160821	-1.59744	-1.13549	0	0	0	0	0	0
1633951	29	5	45	34	44	45	24	0	18	4	3	8	6	5	7	12	TT'	GG'	TT'	CC'	TT'	TT'	GT'	AA'	TT'	TT'	GG'	TA'	GA'	GT'	CT'	GT'	GA'	CT'	45	-1.59074	-1.85431	-0.537295	-3.98234	0.949611	0.518756	-1.59744	-0.260152	0	0	0	0	0	0
1633881	32	2	33	45	40	29	37	0	21	1	3	5	4	5	7	3	TT'	GG'	CT'	CC'	GT'	TT'	GG'	GA'	TT'	TT'	GG'	TA'	GA'	TT'	CC'	GT'	AA'	CC'	44	-2.4338	-1.85431	-2.09087	-6.37898	-2.55225	1.05566	0.741276	-1.13549	0	0	0	0	1	0
1633946	27	10	42	31	45	29	39	0	22	4	4	9	7	7	14	8	TT'	GG'	CT'	CC'	TT'	CT'	GT'	GA'	TT'	TT'	GG'	AA'	AA'	TT'	CT'	GG'	GA'	CC'	23	0.527706	0.45753	-0.242174	0.743063	-0.606771	0.160821	1.52085	1.19874	0	0	0	0	0	1
1633930	24	9	47	33	41	45	38	1	19	11	4	15	8	5	11	12	TA'	GG'	CC'	CC'	TT'	TT'	GG'	GG'	CC'	TT'	GA'	TA'	GA'	TT'	CC'	GG'	AA'	TT'	24	1.42637	-0.861108	2.30072	2.86598	0.949611	-0.376083	-0.817866	0.906961	1	0	1	0	0	0
1633890	23	2	37	42	48	21	44	0	21	2	4	6	4	6	9	11	TT'	GG'	CT'	CC'	GT'	TT'	GT'	GA'	CC'	TT'	GG'	TT'	GG'	GT'	CT'	GG'	GA'	CT'	44	-1.6278	-0.201789	-1.76976	-3.59935	0.560515	-0.55505	0.741276	-1.13549	0	0	0	0	1	0
1633826	22	5	44	39	30	52	25	0	20	9	4	15	8	8	14	3	TA'	GG'	CT'	CC'	TT'	TT'	TT'	GA'	CT'	TT'	GG'	TT'	AA'	GT'	TT'	GG'	AA'	CT'	24	2.21383	1.11685	1.6585	4.98918	-2.55225	-0.734018	-0.0382947	-0.260152	1	0	0	0	0	0
1633898	14	9	25	44	53	45	42	1	18	3	5	10	8	7	15	9	TT'	TG'	CT'	CC'	TT'	TT'	GG'	GA'	CT'	TT'	AA'	TA'	GG'	GT'	CT'	GG'	AA'	CT'	44	1.07122	1.45074	-0.268163	2.25379	-0.217676	-2.16576	-1.59744	0.906961	0	1	0	0	0	0
1633880	28	10	42	36	41	41	40	1	18	5	4	13	8	8	12	9	TA'	GG'	CT'	CC'	TT'	TT'	GG'	GA'	CC'	TT'	GA'	TA'	GA'	GT'	TT'	GG'	AA'	CT'	26	1.12681	1.11685	0.374058	2.61772	-0.217676	0.339788	-1.59744	1.19874	1	0	0	0	0	0
1633925	21	2	35	45	47	41	36	1	23	8	4	13	11	8	17	7	TT'	GG'	CT'	CC'	TT'	CT'	GT'	GA'	TT'	TT'	GG'	TA'	GA'	GT'	CC'	GG'	AA'	CT'	44	2.43926	1.11685	2.22275	5.77886	-0.995867	-0.912986	2.30042	-1.13549	0	0	0	0	0	1
1633884	24	9	40	40	43	37	43	0	17	3	5	6	3	8	8	8	TA'	GG'	CT'	CC'	TT'	TT'	GT'	GA'	CC'	TT'	GG'	AA'	GA'	GT'	CT'	GG'	GA'	TT'	45	-1.89029	2.11005	-1.74377	-1.524	-0.606771	-0.376083	-2.37701	0.906961	1	0	0	0	0	0
1633832	31	15	48	47	48	47	30	1	21	3	4	4	6	7	9	11	TT'	GG'	CT'	CC'	GT'	TT'	GT'	GA'	CC'	TT'	GA'	TA'	GG'	GT'	CT'	GG'	GA'	CC'	44	-2.18984	0.45753	-0.858405	-2.59072	0.560515	0.876692	0.741276	2.65763	0	0	0	0	1	0
1633923	26	2	42	41	44	38	34	0	22	8	6	12	3	5	8	8	TT'	GG'	CC'	CC'	TT'	TT'	GG'	GG'	CT'	TT'	GG'	TA'	GA'	GT'	CT'	GT'	GA'	CT'	44	-0.204163	1.1253	-0.138216	0.782925	-0.606771	-0.0181471	1.52085	-1.13549	0	0	1	0	0	0
1633866	5	4	41	49	52	28	39	1	19	6	4	10	9	6	13	11	TA'	GG'	CC'	CG'	TT'	CT'	GT'	GG'	CT'	TT'	GA'	TT'	GA'	TT'	TT'	GT'	GA'	CT'	44	0.546239	-0.201789	0.990289	1.33474	0.560515	-3.77647	-0.817866	-0.55193	1	0	1	1	0	1
1633954	24	11	42	37	50	38	41	0	20	2	4	10	9	6	12	11	TA'	GG'	CT'	CC'	TT'	TT'	GT'	GA'	TT'	TT'	GG'	TA'	GG'	GG'	CC'	GG'	AA'	CC'	24	0.28375	-0.201789	-0.294152	-0.212191	0.560515	-0.376083	-0.0382947	1.49052	1	0	0	0	0	0
1633844	20	2	31	35	40	36	40	0	21	7	4	13	11	7	16	10	TA'	TG'	TT'	CC'	TT'	CT'	GG'	AA'	CC'	TT'	GA'	AA'	GG'	GT'	CC'	GG'	GG'	CT'	44	2.17677	0.45753	1.90164	4.53594	0.17142	-1.09195	0.741276	-1.13549	1	1	0	0	0	1
1633811	27	4	45	32	35	41	38	1	20	9	5	13	7	5	9	10	TT'	GG'	CC'	CC'	TT'	CT'	GT'	GG'	CC'	TT'	AA'	AA'	GG'	GG'	CC'	GG'	GG'	TT'	44	0.339348	0.132098	1.36338	1.83482	0.17142	0.160821	-0.0382947	-0.55193	0	0	1	0	0	1
1633868	25	8	40	45	53	23	40	1	21	9	4	16	11	6	18	8	TT'	GG'	TT'	CC'	TT'	TT'	GT'	GA'	CT'	TT'	GA'	TA'	GG'	GT'	CC'	GG'	AA'	TT'	24	3.54481	-0.201789	2.54386	5.88688	-0.606771	-0.197115	0.741276	0.615183	0	0	0	0	0	0
1633856	26	7	46	48	40	36	33	1	22	5	5	10	10	7	14	11	TT'	GG'	CC'	CC'	TT'	CT'	TT'	GG'	TT'	TT'	GG'	TA'	GA'	GT'	CC'	GG'	GA'	CT'	24	0.808728	1.45074	0.964299	3.22376	0.560515	-0.0181471	1.52085	0.323405	0	0	1	0	0	1
1633845	26	13	47	51	40	36	38	1	19	6	3	13	11	8	17	10	TA'	GG'	CT'	CC'	GT'	CT'	TT'	GA'	TT'	TT'	GG'	TT'	GA'	TT'	CT'	GG'	AA'	CC'	44	2.43926	0.123644	1.58053	4.14343	0.17142	-0.0181471	-0.817866	2.07407	1	0	0	0	1	1
1633928	6	9	39	32	42	44	41	0	20	6	5	8	3	7	8	10	TA'	GG'	TT'	CC'	TT'	TT'	GG'	AA'	CT'	TT'	GG'	TT'	GA'	GT'	TT'	GT'	AA'	TT'	44	-1.32825	1.45074	-0.780437	-0.657949	0.17142	-3.5975	-0.0382947	0.906961	1	0	0	0	0	0
1633916	25	2	40	49	47	24	50	1	21	8	5	13	11	9	18	8	TA'	GG'	CT'	CC'	TT'	TT'	GT'	GA'	CT'	TT'	GA'	TT'	GA'	GT'	CT'	GG'	GA'	CC'	25	2.70175	2.76937	2.22275	7.69387	-0.606771	-0.197115	0.741276	-1.13549	1	0	0	0	0	0
1633952	26	5	39	35	37	33	31	1	19	4	4	9	4	7	12	10	TT'	GG'	CC'	CC'	TT'	TT'	TT'	GG'	CC'	TT'	GG'	TA'	GG'	GT'	CT'	GG'	GA'	CC'	44	0.00272872	0.45753	-1.12754	-0.667277	0.17142	-0.0181471	-0.817866	-0.260152	0	0	1	0	0	0
1633902	22	3	40	41	43	30	38	1	21	1	5	9	11	6	14	10	TT'	GG'	CC'	CC'	TT'	CT'	GT'	GG'	TT'	TT'	GA'	TT'	GA'	GT'	CC'	GG'	AA'	CC'	44	0.527706	0.791417	-0.0250208	1.2941	0.17142	-0.734018	0.741276	-0.843709	0	0	1	0	0	1
1633839	29	9	35	48	37	38	43	1	19	3	4	8	4	5	8	7	TA'	GG'	CC'	CC'	TT'	TT'	GG'	GG'	CC'	TT'	GG'	TA'	GA'	GT'	TT'	GG'	AA'	CC'	44	-1.32825	-0.861108	-1.44865	-3.638	-0.995867	0.518756	-0.817866	0.906961	1	0	1	0	0	0
1633819	17	12	36	34	42	32	38	0	20	8	4	12	6	7	13	5	TT'	GG'	CC'	CG'	TT'	TT'	GT'	GG'	TT'	TT'	GA'	TT'	GG'	TT'	CT'	GG'	AA'	CC'	44	1.10828	0.45753	0.747147	2.31296	-1.77406	-1.62886	-0.0382947	1.7823	0	0	1	1	0	0
1633852	28	10	38	35	35	40	34	1	21	8	5	12	7	6	12	9	TT'	GG'	CT'	CC'	GT'	TT'	GG'	GG'	CC'	TT'	GG'	TT'	GG'	GG'	CT'	GG'	GA'	CT'	44	0.845793	0.791417	1.04227	2.67948	-0.217676	0.339788	0.741276	1.19874	0	0	0	0	1	0
1633950	29	4	43	38	41	32	44	0	20	2	4	7	2	4	5	9	TA'	GG'	CC'	CC'	TT'	CT'	TT'	GG'	CT'	TT'	GA'	AA'	GA'	GT'	CC'	GG'	AA'	CT'	44	-2.39674	-1.52043	-2.36	-6.27716	-0.217676	0.518756	-0.0382947	-0.55193	1	0	1	0	0	1
1633932	25	4	43	45	41	31	39	1	22	5	4	10	9	8	14	11	TT'	GG'	TT'	CG'	TT'	TT'	TT'	AA'	CT'	TT'	GG'	TT'	GG'	GT'	TT'	GT'	AA'	CT'	34	0.808728	1.11685	0.669179	2.59476	0.560515	-0.197115	1.52085	-0.55193	0	0	0	1	0	0
1633911	24	6	40	42	36	37	38	0	20	11	5	15	7	8	13	8	TA'	TG'	CT'	CC'	TT'	TT'	TT'	GA'	TT'	TT'	GA'	TT'	GA'	TT'	CT'	GG'	GA'	CT'	44	1.95135	2.11005	2.0056	6.067	-0.606771	-0.376083	-0.0382947	0.0316263	1	1	0	0	0	0
1633875	32	3	38	30	41	32	43	1	20	6	3	10	6	5	8	8	TA'	GG'	CT'	CC'	TT'	TT'	TT'	GA'	TT'	TT'	GG'	TA'	GA'	GT'	CC'	GG'	AA'	CT'	44	-0.766205	-1.85431	0.104926	-2.51559	-0.606771	1.05566	-0.0382947	-0.843709	1	0	0	0	0	0
1633953	18	4	41	45	46	32	45	1	20	4	4	8	4	8	9	11	TT'	GG'	CC'	CC'	TT'	CT'	GT'	GG'	CT'	TT'	GG'	TT'	GG'	GT'	CT'	GT'	GA'	CT'	24	-1.06576	1.11685	-1.12754	-1.07645	0.560515	-1.44989	-0.0382947	-0.55193	0	0	1	0	0	1
1633894	32	4	44	51	39	45	37	0	20	5	4	8	6	4	7	8	TA'	GG'	CT'	CC'	TT'	TT'	TT'	GA'	CC'	TT'	GG'	AA'	GA'	GT'	TT'	GG'	GA'	CC'	24	-1.59074	-1.52043	-0.216184	-3.32735	-0.606771	1.05566	-0.0382947	-0.55193	1	0	0	0	0	0
1633899	24	9	43	46	47	26	43	0	21	0	3	5	4	4	5	10	TT'	GG'	CC'	CC'	TT'	CC'	GT'	GG'	CC'	TT'	GG'	AA'	GA'	TT'	CT'	GG'	GG'	TT'	24	-2.95878	-2.51363	-2.41198	-7.88439	0.17142	-0.376083	0.741276	0.906961	0	0	1	0	0	1
1633917	28	11	34	40	36	39	29	1	22	4	4	10	7	6	11	6	TT'	GG'	CT'	CC'	GT'	TT'	TT'	GA'	TT'	TT'	GG'	AA'	GG'	GT'	CT'	GT'	AA'	TT'	44	0.0212612	-0.201789	-0.242174	-0.422701	-1.38496	0.339788	1.52085	1.49052	0	0	0	0	1	0
1633815	31	6	41	39	28	39	32	1	20	5	4	13	7	8	14	10	TT'	GG'	CC'	CC'	TT'	TT'	GT'	GG'	CT'	TT'	GG'	TA'	GG'	GT'	CT'	GG'	GA'	CC'	24	1.65179	1.11685	0.0789367	2.84758	0.17142	0.876692	-0.0382947	0.0316263	0	0	1	0	0	0
1633869	32	15	41	38	40	41	41	0	22	5	6	11	8	6	16	14	AA'	TG'	TT'	CC'	TT'	CC'	GT'	AA'	CT'	TT'	GA'	AA'	GG'	GG'	CT'	GT'	AA'	CT'	44	1.61473	1.78462	0.374058	3.77341	1.7278	1.05566	1.52085	2.65763	1	1	0	0	0	1
1633935	22	6	46	41	44	37	40	0	19	5	4	9	12	7	13	6	TT'	TG'	CT'	CG'	TT'	TT'	TT'	GA'	CT'	TT'	GG'	TA'	GG'	GG'	CC'	GG'	GA'	CT'	44	0.265218	0.45753	1.55454	2.27729	-1.38496	-0.734018	-0.817866	0.0316263	0	1	0	1	0	0
1633821	19	6	39	40	45	33	42	0	19	1	3	4	4	5	7	10	TT'	TG'	CT'	CC'	TT'	TT'	GG'	GA'	CT'	TT'	GG'	AA'	GA'	TT'	TT'	GG'	AA'	CT'	44	-2.71482	-1.85431	-2.09087	-6.66	0.17142	-1.27092	-0.817866	0.0316263	0	1	0	0	0	0
1633931	28	6	45	38	38	35	41	1	19	1	3	6	5	3	7	9	TT'	GG'	CC'	CC'	TT'	TT'	TT'	GG'	CT'	TT'	GA'	TT'	GG'	GG'	TT'	GT'	AA'	CC'	22	-2.15278	-3.17295	-1.79575	-7.12148	-0.217676	0.339788	-0.817866	0.0316263	0	0	1	0	0	0
1633838	26	3	38	48	45	23	40	1	21	3	5	10	9	8	14	2	TT'	GG'	CT'	CC'	GT'	CT'	GG'	GA'	CT'	TT'	GG'	TA'	GG'	TT'	CT'	GG'	GA'	CC'	44	0.808728	2.11005	0.0269579	2.94574	-2.94134	-0.0181471	0.741276	-0.843709	0	0	0	0	1	1
1633830	22	9	34	40	47	40	34	1	19	4	5	11	2	6	8	9	TT'	GG'	CT'	CC'	GT'	CT'	GT'	GA'	CT'	TT'	GA'	TA'	GG'	GT'	CC'	GG'	AA'	TT'	24	-0.485184	0.791417	-1.71778	-1.41155	-0.217676	-0.734018	-0.817866	0.906961	0	0	0	0	1	1
1633895	24	5	40	43	50	42	39	0	20	5	5	11	7	7	12	8	AA'	GG'	CT'	CC'	TT'	CC'	TT'	GA'	CC'	TT'	GA'	TA'	GA'	GT'	TT'	GG'	AA'	CC'	24	0.564771	1.45074	0.0789367	2.09444	-0.606771	-0.376083	-0.0382947	-0.260152	1	0	0	0	0	1
1633889	28	5	40	36	32	36	40	0	21	4	5	11	5	8	14	9	TT'	GG'	CT'	CC'	TT'	CT'	GT'	GA'	TT'	TT'	GA'	TT'	GG'	TT'	CT'	GG'	GG'	CC'	45	1.08975	2.11005	-0.832415	2.36739	-0.217676	0.339788	0.741276	-0.260152	0	0	0	0	0	1
1633904	23	5	33	52	48	33	42	1	21	2	4	9	5	5	11	9	TA'	GG'	CT'	CG'	TT'	TT'	GG'	GA'	CC'	TT'	GG'	TA'	GG'	GT'	CT'	GG'	GA'	TT'	24	-0.25976	-0.861108	-1.47464	-2.5955	-0.217676	-0.55505	0.741276	-0.260152	1	0	0	1	0	0
1633820	17	9	42	44	41	22	43	0	22	4	4	8	6	5	9	3	TT'	GG'	CT'	CC'	GT'	CT'	GT'	GA'	CC'	TT'	AA'	TT'	GG'	GG'	TT'	GG'	GA'	CC'	44	-1.06576	-0.861108	-0.537295	-2.46416	-2.55225	-1.62886	1.52085	0.906961	0	0	0	0	1	1
1633947	25	2	40	34	40	45	38	1	19	2	3	5	5	4	5	5	TT'	GG'	CC'	CC'	TT'	TT'	GT'	GG'	TT'	TT'	GA'	AA'	GG'	TT'	CT'	GT'	AA'	CC'	44	-2.95878	-2.51363	-1.47464	-6.94705	-1.77406	-0.197115	-0.817866	-1.13549	0	0	1	0	0	0
1633912	26	5	36	49	55	20	46	1	21	6	4	11	4	6	11	12	TT'	GG'	TT'	CC'	TT'	CC'	GT'	AA'	CT'	TT'	GG'	TA'	GG'	GG'	CT'	GG'	GA'	CT'	44	0.302283	-0.201789	-0.485316	-0.384822	0.949611	-0.0181471	0.741276	-0.260152	0	0	0	0	0	1
1633817	25	2	32	41	41	43	42	1	20	0	4	8	2	4	5	11	TT'	GG'	CC'	CC'	TT'	TT'	GT'	GG'	CT'	TT'	GA'	AA'	GA'	TT'	TT'	GG'	GA'	CT'	24	-2.11571	-1.52043	-3.00222	-6.63836	0.560515	-0.197115	-0.0382947	-1.13549	0	0	1	0	0	0
1633955	24	2	45	40	44	32	50	0	18	5	4	9	3	6	6	8	TT'	GG'	TT'	CC'	TT'	CT'	GG'	AA'	CT'	TT'	GG'	TT'	GG'	GT'	CT'	GG'	GA'	CT'	24	-1.5722	-0.201789	-1.10155	-2.87554	-0.606771	-0.376083	-1.59744	-1.13549	0	0	0	0	0	1
1633910	30	5	41	36	43	43	33	1	21	5	6	15	8	6	13	5	TT'	GG'	TT'	CC'	TT'	CT'	GT'	AA'	CT'	TT'	GA'	TA'	GA'	GT'	CT'	GT'	AA'	TT'	24	1.95135	1.78462	0.374058	4.11003	-1.77406	0.697724	0.741276	-0.260152	0	0	0	0	0	1
1633871	31	10	54	40	37	43	38	1	20	7	4	14	12	7	15	10	TT'	GG'	CT'	CC'	TT'	TT'	GT'	GA'	CT'	TT'	GG'	TT'	GG'	TT'	CC'	GG'	AA'	CT'	44	2.1953	0.45753	2.19676	4.84959	0.17142	0.876692	-0.0382947	1.19874	0	0	0	0	0	0
1633941	27	3	36	41	36	44	26	0	21	4	3	6	5	5	6	0	TT'	TG'	TT'	CG'	GT'	CT'	GG'	AA'	CT'	TT'	AA'	TA'	GG'	GG'	CT'	GG'	AA'	TT'	22	-2.41527	-1.85431	-0.832415	-5.102	-3.71953	0.160821	0.741276	-0.843709	0	1	0	1	1	1
1633933	26	4	38	38	45	41	38	1	21	7	5	20	11	7	20	10	TT'	GG'	CT'	CC'	GT'	TT'	GG'	GA'	TT'	TT'	GG'	TA'	GG'	GG'	CT'	GG'	AA'	CC'	44	5.19387	1.45074	1.90164	8.54625	0.17142	-0.0181471	0.741276	-0.55193	0	0	0	0	1	0
1633829	32	7	37	45	47	47	33	0	22	3	2	7	4	5	8	11	TA'	GG'	CT'	CC'	GT'	CT'	GT'	GA'	CT'	TT'	GG'	TA'	GG'	GG'	TT'	GG'	AA'	CC'	24	-1.60927	-2.84752	-1.44865	-5.90543	0.560515	1.05566	1.52085	0.323405	1	0	0	0	1	1
1633870	23	9	41	42	46	38	45	1	19	4	3	5	5	5	6	13	TT'	TG'	CT'	CC'	TT'	CC'	TT'	GA'	CT'	TT'	GA'	AA'	GA'	TT'	TT'	GG'	GA'	CC'	44	-2.69629	-1.85431	-0.832415	-5.38302	1.33871	-0.55505	-0.817866	0.906961	0	1	0	0	0	1
1633814	17	3	41	41	36	47	31	1	22	8	3	9	9	7	13	4	TT'	GG'	CT'	CC'	TT'	CT'	GG'	GA'	TT'	TT'	GG'	TT'	GA'	TT'	CT'	GG'	GG'	CT'	44	0.265218	-0.535675	1.63251	1.36205	-2.16315	-1.62886	1.52085	-0.843709	0	0	0	0	0	1
1633822	32	10	45	40	52	30	36	1	20	3	4	8	9	4	12	9	TT'	GG'	CC'	CC'	GT'	TT'	GG'	GG'	TT'	TT'	AA'	TT'	GA'	GT'	CT'	GG'	GA'	CT'	44	-0.278293	-1.52043	0.0269579	-1.77176	-0.217676	1.05566	-0.0382947	1.19874	0	0	1	0	1	0
1633922	30	7	39	45	44	47	48	1	22	3	4	10	7	4	10	8	TT'	GG'	CC'	CC'	TT'	CT'	GT'	GG'	TT'	TT'	GG'	TA'	GA'	TT'	CT'	GG'	GG'	CC'	44	-0.241228	-1.52043	-0.563284	-2.32494	-0.606771	0.697724	1.52085	0.323405	0	0	1	0	0	1
1633810	32	5	38	45	32	25	34	1	18	3	5	10	4	8	12	10	TT'	GG'	CT'	CC'	TT'	TT'	TT'	GA'	CC'	TT'	GG'	AA'	GG'	TT'	CT'	GG'	GA'	TT'	44	0.28375	2.11005	-1.44865	0.945158	0.17142	1.05566	-1.59744	-0.260152	0	0	0	0	0	0
1633887	21	6	41	50	53	23	50	1	18	3	3	6	8	7	13	6	TT'	GG'	TT'	CC'	TT'	CC'	GG'	GA'	CT'	TT'	AA'	TT'	GA'	GT'	TT'	GG'	GA'	CC'	44	-0.577846	-0.535675	-0.268163	-1.38168	-1.38496	-0.912986	-1.59744	0.0316263	0	0	0	0	0	1
1633891	25	6	43	50	50	40	44	1	21	6	4	13	9	6	15	11	TA'	GG'	TT'	CC'	GT'	TT'	GG'	AA'	CC'	TT'	GA'	TA'	GA'	GT'	CT'	GG'	AA'	TT'	44	1.91428	-0.201789	0.990289	2.70278	0.560515	-0.197115	0.741276	0.0316263	1	0	0	0	1	0
1633834	27	1	39	41	38	35	30	0	19	3	4	7	2	7	9	10	TA'	TG'	CT'	CC'	TT'	CT'	GT'	GA'	CT'	TT'	GG'	AA'	GG'	TT'	TT'	GT'	AA'	CC'	44	-1.34678	0.45753	-2.03889	-2.92814	0.17142	0.160821	-0.817866	-1.42727	1	1	0	0	0	1
1633908	25	4	34	31	45	42	38	1	21	2	4	6	4	8	10	6	TT'	GG'	CC'	CC'	TT'	CT'	TT'	GG'	CT'	TT'	GG'	TA'	GA'	TT'	CT'	GT'	GA'	CC'	24	-1.36531	1.11685	-1.76976	-2.01822	-1.38496	-0.197115	0.741276	-0.55193	0	0	1	0	0	1
1633873	20	4	44	36	43	52	32	0	20	7	4	10	6	7	11	11	TA'	TG'	CC'	CC'	GT'	CC'	GT'	GG'	CT'	TT'	GG'	TA'	GA'	TT'	CC'	GT'	AA'	CT'	44	0.0212612	0.45753	0.426036	0.904828	0.560515	-1.09195	-0.0382947	-0.55193	1	1	1	0	1	1
1633872	30	6	47	40	28	45	36	1	19	6	2	10	8	8	14	3	TT'	TT'	CC'	CC'	TT'	CT'	TT'	GG'	CT'	TT'	GG'	TT'	GA'	TT'	CT'	GG'	AA'	CT'	24	0.808728	-0.869562	0.695168	0.634334	-2.55225	0.697724	-0.817866	0.0316263	0	1	1	0	0	1
1633816	26	7	39	43	42	38	37	0	21	0	3	6	2	5	8	12	TT'	GG'	CC'	CC'	TT'	CT'	GT'	GG'	CT'	TT'	GA'	TA'	GG'	GT'	CT'	GT'	AA'	CC'	46	-1.89029	-1.85431	-3.00222	-6.74682	0.949611	-0.0181471	0.741276	0.323405	0	0	1	0	0	1
1633840	30	7	40	39	42	43	38	1	21	5	4	10	6	5	9	6	TT'	GG'	CT'	CC'	GT'	TT'	TT'	GA'	CT'	TT'	GA'	AA'	GG'	GT'	CT'	GG'	GG'	CT'	24	-0.503717	-0.861108	-0.216184	-1.58101	-1.38496	0.697724	0.741276	0.323405	0	0	0	0	1	0
1633812	23	11	47	44	59	29	46	1	19	4	5	10	6	6	10	11	TT'	GG'	CT'	CG'	GT'	CC'	GT'	GA'	CC'	TT'	GA'	TT'	GG'	TT'	CT'	GG'	AA'	CC'	44	-0.241228	0.791417	-0.537295	0.0128949	0.560515	-0.55505	-0.817866	1.49052	0	0	0	1	1	1
1633831	27	11	41	45	52	24	48	1	21	4	4	9	6	6	12	9	AA'	GG'	CC'	CC'	TT'	TT'	GT'	GG'	CC'	TT'	GA'	AA'	GG'	GG'	TT'	GT'	GA'	CC'	44	0.00272872	-0.201789	-0.537295	-0.736354	-0.217676	0.160821	0.741276	1.49052	1	0	1	0	0	0
1633882	30	5	43	40	45	27	38	1	20	7	3	11	10	7	14	10	TT'	GG'	CC'	CC'	GT'	TT'	GT'	GG'	TT'	TT'	GG'	TT'	GA'	GT'	CT'	GT'	AA'	CT'	24	1.08975	-0.535675	1.60652	2.16059	0.17142	0.697724	-0.0382947	-0.260152	0	0	1	0	1	0
1633861	22	10	35	38	40	42	37	0	21	5	4	8	5	8	12	10	TT'	GG'	CT'	CC'	TT'	TT'	GT'	GA'	CC'	TT'	GG'	TT'	GG'	GT'	CT'	GG'	GA'	CT'	27	-0.278293	1.11685	-0.511305	0.327251	0.17142	-0.734018	0.741276	1.19874	0	0	0	0	0	0
1633809	19	4	34	44	36	35	35	1	21	3	4	6	5	5	9	12	TT'	GG'	CC'	CC'	GT'	TT'	GG'	GG'	CT'	TT'	GA'	TA'	GG'	GT'	CT'	GG'	AA'	CT'	44	-1.6278	-0.861108	-1.15353	-3.64244	0.949611	-1.27092	0.741276	-0.55193	0	0	1	0	1	0
1633813	22	2	33	35	37	42	33	1	21	4	5	9	9	9	17	7	TT'	GG'	TT'	CC'	TT'	CT'	GT'	AA'	CT'	TT'	GG'	TT'	GG'	TT'	CT'	GG'	AA'	CC'	24	1.31517	2.76937	0.348068	4.43262	-0.995867	-0.734018	0.741276	-1.13549	0	0	0	0	0	1
1633825	20	7	41	44	50	32	42	1	21	4	2	7	4	6	11	8	TT'	GG'	CT'	CC'	TT'	CT'	TT'	GA'	CT'	TT'	GG'	AA'	GA'	GT'	CT'	GG'	AA'	TT'	44	-0.821803	-2.1882	-1.12754	-4.13754	-0.606771	-1.09195	0.741276	0.323405	0	0	0	0	0	1
1633862	27	4	38	50	44	40	45	1	19	3	2	4	3	3	5	12	TA'	GG'	CT'	CC'	TT'	CT'	GT'	GA'	CT'	TT'	GA'	TA'	AA'	TT'	CC'	GT'	GA'	CC'	44	-3.2398	-4.16616	-1.74377	-9.14972	0.949611	0.160821	-0.817866	-0.55193	1	0	0	0	0	1
1633808	26	5	36	42	42	34	39	1	20	2	2	5	4	6	8	10	TT'	GG'	CT'	CC'	TT'	TT'	GT'	GA'	CC'	TT'	GA'	AA'	GA'	TT'	CC'	GG'	GA'	TT'	44	-2.17131	-2.1882	-1.76976	-6.12927	0.17142	-0.0181471	-0.0382947	-0.260152	0	0	0	0	0	0
1633843	23	2	35	44	36	48	30	1	22	0	2	5	4	4	8	6	AA'	GG'	CT'	CG'	TT'	TT'	GT'	GA'	CT'	TT'	GG'	TA'	GA'	TT'	CC'	GT'	GA'	CT'	44	-2.17131	-3.50684	-2.41198	-8.09013	-1.38496	-0.55505	1.52085	-1.13549	1	0	0	1	0	0
1633848	20	3	35	45	47	34	45	1	21	1	2	6	5	6	7	8	TT'	GG'	CC'	CG'	TT'	CT'	TT'	GG'	TT'	TT'	GA'	TA'	GG'	GT'	TT'	GG'	GA'	CT'	24	-2.15278	-2.1882	-1.79575	-6.13673	-0.606771	-1.09195	0.741276	-0.843709	0	0	1	1	0	1
1633958	25	9	41	46	48	26	44	1	19	1	4	6	3	5	6	3	TA'	GG'	CT'	CC'	TT'	CT'	GG'	GA'	CT'	TT'	GA'	TA'	GA'	GT'	CT'	GG'	AA'	CT'	44	-2.41527	-0.861108	-2.38599	-5.66236	-2.55225	-0.197115	-0.817866	0.906961	1	0	0	0	0	1
1633915	32	0	35	43	42	36	48	1	21	3	4	8	2	5	7	9	TT'	GG'	CT'	CG'	TT'	TT'	GT'	GA'	CT'	TT'	GA'	TT'	GG'	GT'	TT'	GG'	GA'	CC'	44	-1.59074	-0.861108	-2.03889	-4.49073	-0.217676	1.05566	0.741276	-1.71904	0	0	0	1	0	0
1633867	27	3	42	44	40	47	42	1	20	3	2	5	5	5	11	6	TT'	GG'	CT'	CC'	TT'	CT'	GG'	GA'	CC'	TT'	GG'	TT'	GG'	TT'	CT'	GG'	AA'	CT'	44	-1.38385	-2.84752	-1.15353	-5.38489	-1.38496	0.160821	-0.0382947	-0.843709	0	0	0	0	0	1
1633924	16	9	32	46	44	26	45	1	20	2	3	4	4	5	7	11	TT'	GG'	CT'	CC'	TT'	CT'	GG'	GA'	TT'	TT'	AA'	TT'	GA'	TT'	TT'	GG'	GA'	CT'	34	-2.71482	-1.85431	-1.76976	-6.33889	0.560515	-1.80782	-0.0382947	0.906961	0	0	0	0	0	1
1633907	22	2	33	40	37	47	35	0	22	0	2	3	6	2	6	8	TT'	GG'	CC'	CC'	GT'	TT'	GG'	GG'	CT'	TT'	GG'	TA'	GG'	TT'	TT'	GG'	AA'	CC'	24	-3.25833	-4.82548	-1.82174	-9.90554	-0.606771	-0.734018	1.52085	-1.13549	0	0	1	0	1	0
1633857	30	6	48	40	40	32	35	1	19	2	4	9	5	6	10	13	TA'	GG'	CT'	CC'	TT'	TT'	GT'	GA'	TT'	TT'	GG'	AA'	GG'	GG'	CT'	GG'	AA'	CC'	24	-0.522249	-0.201789	-1.47464	-2.19867	1.33871	0.697724	-0.817866	0.0316263	1	0	0	0	0	0
1633936	27	6	40	41	43	36	37	1	22	4	4	9	7	4	10	7	TT'	TG'	CT'	CG'	GT'	CT'	GT'	GG'	CT'	TT'	GG'	TT'	GG'	GG'	CT'	GG'	AA'	CC'	44	-0.522249	-1.52043	-0.242174	-2.28485	-0.995867	0.160821	1.52085	0.0316263	0	1	0	1	1	1
1633956	26	2	33	48	47	31	40	1	22	2	3	8	5	7	8	11	TT'	GG'	CT'	CC'	TT'	TT'	TT'	GA'	CT'	TT'	GG'	TA'	AA'	TT'	TT'	GT'	AA'	CT'	44	-1.32825	-0.535675	-1.47464	-3.33856	0.560515	-0.0181471	1.52085	-1.13549	0	0	0	0	0	0
1633877	24	6	49	42	32	42	43	0	22	3	2	7	1	4	5	10	TT'	GG'	CC'	CC'	TT'	CT'	TT'	GG'	TT'	TT'	GA'	TA'	GG'	GT'	CT'	GG'	AA'	CT'	24	-2.39674	-3.50684	-2.33401	-8.23758	0.17142	-0.376083	1.52085	0.0316263	0	0	1	0	0	1
1633920	31	4	37	36	35	48	28	1	21	5	3	10	7	5	10	11	TT'	GG'	CT'	CC'	TT'	TT'	GG'	GA'	CT'	TT'	GG'	TT'	GA'	GT'	CC'	GG'	AA'	TT'	24	-0.241228	-1.85431	0.0789367	-2.0166	0.560515	0.876692	0.741276	-0.55193	0	0	0	0	0	0
1633851	20	12	36	42	40	37	42	1	21	7	4	11	7	6	12	4	TA'	GG'	CC'	CC'	TT'	CT'	GT'	GG'	CT'	TT'	GG'	TA'	GA'	TT'	CT'	GT'	GA'	CT'	23	0.564771	-0.201789	0.721157	1.08414	-2.16315	-1.09195	0.741276	1.7823	1	0	1	0	0	1
1633864	34	6	42	35	45	39	39	0	20	5	4	9	4	6	9	10	TT'	TG'	CT'	CC'	TT'	TT'	GG'	GA'	TT'	TT'	GA'	TT'	GG'	GG'	CT'	GG'	GA'	CC'	44	-0.784738	-0.201789	-0.806426	-1.79295	0.17142	1.41359	-0.0382947	0.0316263	0	1	0	0	0	0
1633929	22	7	53	39	44	31	46	1	20	12	4	18	15	7	22	9	TT'	GG'	TT'	CC'	GT'	TT'	GG'	AA'	TT'	TT'	GG'	TA'	GG'	GT'	CT'	GG'	GA'	CC'	22	5.15681	0.45753	4.68768	10.302	-0.217676	-0.734018	-0.0382947	0.323405	0	0	0	0	1	0
1633885	32	0	33	47	39	34	39	1	21	2	5	9	8	6	13	8	TT'	GG'	CC'	CC'	TT'	TT'	GT'	GG'	CC'	TT'	GG'	TA'	GG'	GG'	TT'	GT'	AA'	CC'	44	0.265218	0.791417	-0.589273	0.467361	-0.606771	1.05566	0.741276	-1.71904	0	0	1	0	0	0
1633960	9	8	36	40	34	36	34	0	21	5	4	7	4	5	7	6	TT'	GG'	TT'	CC'	TT'	TT'	TT'	AA'	TT'	TT'	GG'	AA'	AA'	TT'	CC'	GG'	GA'	CC'	44	-1.87176	-0.861108	-0.806426	-3.53929	-1.38496	-3.0606	0.741276	0.615183	0	0	0	0	0	0
1633918	19	5	32	46	32	28	39	1	19	3	3	8	7	6	12	12	TT'	GG'	CT'	CC'	GT'	CT'	GT'	GA'	CT'	TT'	GA'	TA'	GG'	GT'	CT'	GG'	AA'	CC'	44	-0.278293	-1.19499	-0.563284	-2.03657	0.949611	-1.27092	-0.817866	-0.260152	0	0	0	0	1	1
1633940	29	3	33	40	43	36	44	1	21	0	3	7	3	5	6	13	TA'	GG'	CT'	CC'	TT'	CT'	TT'	GA'	CT'	TT'	GG'	TA'	AA'	GT'	CT'	GG'	GA'	CC'	24	-2.13425	-1.85431	-2.7071	-6.69566	1.33871	0.518756	0.741276	-0.843709	1	0	0	0	0	1
1633893	24	5	41	40	47	33	42	1	20	2	3	5	2	5	8	12	TT'	GG'	CT'	CC'	GG'	TT'	GT'	GA'	CC'	TT'	GA'	TA'	GA'	GT'	CC'	GT'	AA'	CT'	24	-2.17131	-1.85431	-2.36	-6.38562	0.949611	-0.376083	-0.0382947	-0.260152	0	0	0	0	1	0
1633948	18	6	34	33	39	40	40	0	21	1	5	7	5	4	8	7	TT'	TG'	CC'	CC'	TT'	CT'	GG'	GG'	TT'	TT'	GG'	AA'	GG'	GG'	CT'	GG'	AA'	CC'	44	-1.60927	-0.527221	-1.79575	-3.93224	-0.995867	-1.44989	0.741276	0.0316263	0	1	1	0	0	1
1633938	27	4	42	36	43	39	40	1	20	2	2	6	5	7	10	10	TA'	GG'	CT'	CC'	TT'	CT'	GT'	GA'	TT'	TT'	GG'	TA'	GG'	GT'	TT'	GG'	AA'	CT'	44	-1.36531	-1.52888	-1.47464	-4.36883	0.17142	0.160821	-0.0382947	-0.55193	1	0	0	0	0	1
1633892	24	9	42	44	46	32	44	1	20	2	3	7	4	6	7	11	TA'	GG'	CC'	CC'	GT'	TT'	TT'	GG'	CT'	TT'	GG'	TA'	GG'	GT'	TT'	GG'	GA'	CT'	44	-1.87176	-1.19499	-1.76976	-4.83651	0.560515	-0.376083	-0.0382947	0.906961	1	0	1	0	1	0
1633921	24	5	41	40	38	34	44	1	21	4	3	7	8	4	10	8	TT'	GG'	TT'	CC'	TT'	TT'	GT'	AA'	TT'	TT'	GG'	TA'	GG'	GG'	CT'	GG'	GA'	CC'	24	-1.08429	-2.51363	0.0529473	-3.54498	-0.606771	-0.376083	0.741276	-0.260152	0	0	0	0	0	0
1633859	28	4	40	36	29	45	37	1	18	10	5	17	10	4	11	9	TT'	TG'	CC'	CC'	GG'	TT'	GG'	GG'	TT'	TT'	GA'	TA'	GG'	GT'	TT'	GG'	GA'	CC'	44	1.98841	-0.527221	2.56985	4.03104	-0.217676	0.339788	-1.59744	-0.55193	0	1	1	0	1	0
1633833	23	3	40	45	44	32	42	1	22	2	4	8	3	5	7	10	TA'	GG'	CT'	CC'	GT'	TT'	GT'	GA'	CT'	TT'	GG'	TA'	GG'	GT'	CT'	GG'	AA'	CC'	44	-1.59074	-0.861108	-2.06488	-4.51672	0.17142	-0.55505	1.52085	-0.843709	1	0	0	0	1	0
1633835	7	6	37	36	41	44	43	0	18	0	3	4	1	4	5	10	TT'	GG'	CT'	CC'	GT'	CT'	GT'	GA'	CT'	TT'	GG'	TT'	GG'	GG'	TT'	GG'	GA'	TT'	24	-3.2398	-2.51363	-3.29734	-9.05077	0.17142	-3.41853	-1.59744	0.0316263	0	0	0	0	1	1
1633883	17	14	43	47	51	31	47	0	19	6	3	12	9	6	15	12	TT'	GG'	CC'	CC'	TT'	TT'	GT'	GG'	CT'	TT'	GG'	TA'	GG'	TT'	CC'	GG'	AA'	CC'	24	1.63326	-1.19499	0.990289	1.42855	0.949611	-1.62886	-0.817866	2.36585	0	0	1	0	0	0
1633945	20	5	40	40	51	34	45	0	22	5	4	7	7	5	7	9	TT'	GG'	CT'	CC'	TT'	TT'	TT'	GA'	CT'	TT'	GA'	AA'	GG'	GT'	CT'	GG'	GA'	CC'	22	-1.87176	-0.861108	0.0789367	-2.65393	-0.217676	-1.09195	1.52085	-0.260152	0	0	0	0	0	0
1633927	29	2	40	37	37	46	34	1	21	2	4	8	5	6	10	7	TA'	GG'	CC'	CG'	TT'	TT'	GT'	GG'	CT'	TT'	GA'	AA'	GG'	TT'	TT'	GG'	AA'	CC'	44	-0.80327	-0.201789	-1.47464	-2.4797	-0.995867	0.518756	0.741276	-1.13549	1	0	1	1	0	0
1633879	28	6	42	43	45	37	42	0	21	2	4	8	5	9	11	9	TA'	GG'	CT'	CC'	TT'	TT'	GG'	GA'	CT'	TT'	GG'	AA'	GG'	GG'	TT'	GG'	AA'	TT'	22	-0.540781	1.77617	-1.47464	-0.239249	-0.217676	0.339788	0.741276	0.0316263	1	0	0	0	0	0
1633855	22	8	48	36	35	45	36	1	19	7	3	10	6	6	9	10	TA'	GG'	CT'	CG'	TT'	CT'	GG'	GA'	TT'	TT'	GG'	TA'	GA'	GT'	CT'	GG'	AA'	TT'	44	-0.503717	-1.19499	0.426036	-1.27267	0.17142	-0.734018	-0.817866	0.615183	1	0	0	1	0	1
1633886	29	2	36	44	36	32	38	1	21	3	4	9	5	7	10	10	TA'	TG'	CT'	CC'	TT'	CT'	TT'	GA'	CC'	TT'	GA'	AA'	GG'	GT'	CT'	GT'	AA'	CC'	24	-0.522249	0.45753	-1.15353	-1.21824	0.17142	0.518756	0.741276	-1.13549	1	1	0	0	0	1
1633863	26	10	33	35	44	42	42	0	20	1	3	5	2	6	8	7	TT'	GG'	CT'	CC'	GT'	TT'	GT'	GA'	TT'	TT'	GG'	TA'	GA'	GT'	CT'	GT'	GA'	TT'	24	-2.17131	-1.19499	-2.68111	-6.04742	-0.995867	-0.0181471	-0.0382947	1.19874	0	0	0	0	1	0
1633865	33	13	44	36	46	22	53	0	20	7	3	13	8	7	16	9	TA'	GG'	TT'	CC'	TT'	TT'	GT'	AA'	CC'	TT'	GG'	TA'	GG'	GT'	CT'	GG'	AA'	CC'	24	2.17677	-0.535675	1.01628	2.65737	-0.217676	1.23463	-0.0382947	2.07407	1	0	0	0	0	0
1633926	28	12	44	43	59	23	52	0	20	7	3	13	12	7	18	14	TT'	GG'	CC'	CC'	GT'	TT'	GG'	GG'	TT'	TT'	GG'	AA'	AA'	TT'	CT'	GT'	AA'	CT'	44	2.70175	-0.535675	2.19676	4.36283	1.7278	0.339788	-0.0382947	1.7823	0	0	1	0	1	0
1633876	24	12	37	39	46	43	41	1	23	6	3	10	6	7	13	7	TT'	GG'	TT'	CG'	TT'	CT'	GG'	AA'	CC'	TT'	GG'	TT'	GA'	TT'	CT'	GT'	GA'	CC'	44	0.546239	-0.535675	0.104926	0.11549	-0.995867	-0.376083	2.30042	1.7823	0	0	0	1	0	1
[truncated: 11 more columns]
